# Supplementary material for: Impact of endometriosis on women’s life decisions and goal attainment: a cross-sectional survey of members of an online patient community
Source: PubMed Central journal article supplement — BMJ Open. 2022 Apr 26;12(4):e052765. doi: 10.1136/bmjopen-2021-052765 (PMC9047767; doi:10.1136/bmjopen-2021-052765), 2022-04-26
Supplement: bmjopen-2021-052765.draft_revisions.pdf [file bmjopen-2021-052765.draft_revisions.pdf]

# BMJ Open

BMJ Open is committed to open peer review. As part of this commitment we make the peer review history of every article we publish publicly available.

When an article is published we post the peer reviewers' comments and the authors' responses online. We also post the versions of the paper that were used during peer review. These are the versions that the peer review comments apply to.

The versions of the paper that follow are the versions that were submitted during the peer review process. They are not the versions of record or the final published versions. They should not be cited or distributed as the published version of this manuscript.

BMJ Open is an open access journal and the full, final, typeset and author-corrected version of record of the manuscript is available on our site with no access controls, subscription charges or pay-per-view fees (<http://bmjopen.bmj.com>).

If you have any questions on BMJ Open's open peer review process please email [info.bmjopen@bmj.com](mailto:info.bmjopen@bmj.com)

# BMJ Open

## The impact of endometriosis on women's life decisions and goal attainment

|                               |                                                                                                                                                                                                                                                                                                                                                                                                                                                                                                                                                                                                  |
|-------------------------------|--------------------------------------------------------------------------------------------------------------------------------------------------------------------------------------------------------------------------------------------------------------------------------------------------------------------------------------------------------------------------------------------------------------------------------------------------------------------------------------------------------------------------------------------------------------------------------------------------|
| Journal:                      | <i>BMJ Open</i>                                                                                                                                                                                                                                                                                                                                                                                                                                                                                                                                                                                  |
| Manuscript ID                 | bmjopen-2021-052765                                                                                                                                                                                                                                                                                                                                                                                                                                                                                                                                                                              |
| Article Type:                 | Original research                                                                                                                                                                                                                                                                                                                                                                                                                                                                                                                                                                                |
| Date Submitted by the Author: | 25-May-2021                                                                                                                                                                                                                                                                                                                                                                                                                                                                                                                                                                                      |
| Complete List of Authors:     | Missmer, Stacey A.; Michigan State University College of Human Medicine; Harvard University T H Chan School of Public Health<br>Tu, Frank; NorthShore University HealthSystem; University of Chicago Pritzker School of Medicine<br>Soliman, Ahmed M.; AbbVie Inc<br>Chiuve, Stephanie; AbbVie Inc<br>Cross, Sarah; AbbVie Inc<br>Eichner, Samantha; AbbVie Inc<br>Antunez Flores, Oscar; AbbVie Inc<br>Horne, Andrew; The University of Edinburgh MRC Centre for Reproductive Health,<br>Schneider, Beth; MyHealthTeams<br>As-Sanie, Sawsan; University of Michigan, Obstetrics and Gynaecology |
| Keywords:                     | GYNAECOLOGY, Community gynaecology < GYNAECOLOGY, QUALITATIVE RESEARCH                                                                                                                                                                                                                                                                                                                                                                                                                                                                                                                           |
|                               |                                                                                                                                                                                                                                                                                                                                                                                                                                                                                                                                                                                                  |

SCHOLARONE™  
Manuscripts

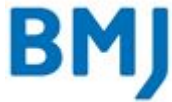

I, the Submitting Author has the right to grant and does grant on behalf of all authors of the Work (as defined in the below author licence), an exclusive licence and/or a non-exclusive licence for contributions from authors who are: i) UK Crown employees; ii) where BMJ has agreed a CC-BY licence shall apply, and/or iii) in accordance with the terms applicable for US Federal Government officers or employees acting as part of their official duties; on a worldwide, perpetual, irrevocable, royalty-free basis to BMJ Publishing Group Ltd ("BMJ") its licensees and where the relevant Journal is co-owned by BMJ to the co-owners of the Journal, to publish the Work in this journal and any other BMJ products and to exploit all rights, as set out in our [licence](#).

The Submitting Author accepts and understands that any supply made under these terms is made by BMJ to the Submitting Author unless you are acting as an employee on behalf of your employer or a postgraduate student of an affiliated institution which is paying any applicable article publishing charge ("APC") for Open Access articles. Where the Submitting Author wishes to make the Work available on an Open Access basis (and intends to pay the relevant APC), the terms of reuse of such Open Access shall be governed by a Creative Commons licence – details of these licences and which [Creative Commons](#) licence will apply to this Work are set out in our licence referred to above.

Other than as permitted in any relevant BMJ Author's Self Archiving Policies, I confirm this Work has not been accepted for publication elsewhere, is not being considered for publication elsewhere and does not duplicate material already published. I confirm all authors consent to publication of this Work and authorise the granting of this licence.

## The impact of endometriosis on women's life decisions and goal attainment

Stacey A Missmer,<sup>1</sup> Frank F Tu,<sup>2</sup> Ahmed M Soliman,<sup>3</sup> Stephanie E Chiuve,<sup>3</sup> Sarah Cross,<sup>3</sup>  
Samantha Eichner,<sup>3</sup> Oscar Antunez Flores,<sup>3</sup> Andrew W Horne,<sup>4</sup> Beth Schneider,<sup>5</sup> Sawsan As-  
Sanie<sup>6</sup>

<sup>1</sup>Department of Epidemiology, Harvard T. H. Chan School of Public Health; and Boston Center  
for Endometriosis, Boston, Massachusetts, USA, and Department of Obstetrics, Gynecology,  
and Reproductive Biology, Michigan State University, Grand Rapids, Michigan, USA;

<sup>2</sup>Department of Obstetrics and Gynecology, NorthShore University Health System and Pritzker  
School of Medicine, University of Chicago, Evanston, Illinois, USA; <sup>3</sup>AbbVie Inc, North Chicago,  
Illinois, USA; <sup>4</sup>Medical Research Council Centre for Reproductive Health, University of  
Edinburgh, Edinburgh, UK; <sup>5</sup>MyHealthTeams, San Francisco, California, USA; <sup>6</sup>Department of  
Obstetrics and Gynecology, University of Michigan, Ann Arbor, Michigan, USA.

**Word Count:** 3893 words

**Key Words:** Qualitative Research; Gynaecology; Community Gynaecology

**Correspondence to**

Dr Stacey A Missmer

Professor of Obstetrics, Gynecology, and Reproductive Biology

Michigan State University College of Human Medicine

15 Michigan Street NE

Grand Rapids, MI 49503

Phone: 616-234-2705

Email: [missmers@msu.edu](mailto:missmers@msu.edu)

**ABSTRACT**

**Objective** To examine women's perceptions of endometriosis-associated disease burden and its impact on life decisions and goal attainment.

**Methods:** An anonymous online survey was distributed in October 2018 through the social media network MyEndometriosisTeam.com to women aged 19 years and older living in several English-speaking countries who self-identified as having endometriosis.

**Results:** A total of 743 women completed the survey (69% from North America, 17% United Kingdom, 6% Oceania/Australia). Women reported high levels of pain when pain was at its worst (mean score, 8.9 on severity scale of 0 [no pain] to 10 [worst imaginable pain]) and most (56%) experienced pain daily. Women reported other negative experiences attributed to endometriosis, including emergency department visits (66%), multiple surgeries (55%), and prescription treatments for symptoms of endometriosis (72%). Women indicated that they believed endometriosis had a negative impact on their educational and professional achievements, social lives/relationships, and overall physical health. Most women "somewhat agreed"/ "strongly agreed" that endometriosis caused them to lose time in life (82%), have a less positive opinion about their future (80%), and had prohibited them from reaching their full life potential (76%).

**Conclusion:** Pain and negative experiences related to endometriosis were perceived to negatively impact major life-course decisions and attainment of goals. Greater practitioner awareness of the impact endometriosis has on a woman's life-course and the importance of meaningful dialogue with patients may be important to improve long-term management of the disease and help identify women who are most vulnerable.

1  
2  
3 **Abstract Word Count: 241**  
4  
5  
6

7 **Strengths and limitations of this study**  
8  
9

- 10
- 11 • Strength: Quantitative survey of meaningful sample size spanning multiple countries
  - 12 • Strength: Targeted research questions were made possible by use of a social network  
13 that allowed questions to be developed based on existing conversations on the platform  
14
  - 15 • Strength: Use of social network familiar to patients may have led to increased honesty in  
16 responses to sensitive topics  
17
  - 18 • Limitation: No comparisons were made between women who had endometriosis versus  
19 women who did not have endometriosis or women who had other chronic conditions,  
20 particularly those associated with pain  
21
  - 22 • Limitation: Patient responses were self-reported and not confirmed by medical records  
23 or other data  
24  
25  
26  
27  
28  
29  
30  
31  
32  
33  
34  
35  
36  
37  
38  
39  
40  
41  
42  
43  
44  
45  
46  
47  
48  
49  
50  
51  
52  
53  
54  
55  
56  
57  
58  
59  
60

## BACKGROUND

Endometriosis is an often chronic gynecologic disorder that impacts 10% of women of reproductive age.<sup>1</sup> Endometrial-like tissue thriving outside the uterus leads to local and systemic inflammation that can result in a wide range of life-impacting effects, including pelvic pain, dysmenorrhea, dyspareunia, and infertility.<sup>2-4</sup> These debilitating effects have an immense impact on a patient's quality of life and overall well-being.<sup>5,6</sup> For example, symptoms of endometriosis may have a negative impact on women's psychological health,<sup>7,8</sup> strain social and intimate relationships,<sup>5,9-11</sup> and lead to losses in productivity both at home and in the workplace.<sup>12</sup>

Outside the physical and emotional toll, the collective symptoms of endometriosis are also associated with direct and indirect costs that are burdensome to patients. Visits to physicians, visits to the emergency department, pharmacy claims, and other direct expenses are estimated to cost between \$12,000 to \$15,000 per patient per year in the United States, and the loss of work and productivity may amount to additional thousands of dollars lost per patient.<sup>12-16</sup>

Most studies examining chronic diseases like endometriosis focus on one or two specific areas of the disease, such as its social, physical, or psychological impact at a specific point in time.<sup>17,18</sup> In contrast, few studies have examined the life-course impact of endometriosis and how symptoms and experiences resulting from the disease influence major life events, decisions, and the overall ability of patients to attain their life goals.<sup>17,18</sup> The few existing studies have small sample sizes or are qualitative, relying on informational interviews to ascertain life-course impact of the disease.<sup>11,19,20</sup> Understanding life-course impairment as opposed to focusing on the symptoms of the disease (such as pain or infertility that are most often addressed individually not holistically) is vital because of the complicated interrelationship among symptoms and their downstream effects. Individual symptoms can influence critical life



1  
2  
3 decisions (eg, work, education, or personal relationships) in ways that are interrelated and can  
4 impact other areas of a patient's life. For example, chronic pain may influence the type and  
5 amount of work performed or whether a patient decides to work at all, which in turn can have  
6 financial implications on the patient's lifestyle, family, relationships, or sense of personal  
7 fulfillment.<sup>17,18</sup> Symptoms may determine where a patient chooses to live because of financial  
8 considerations, healthcare access, or proximity to support networks. Similarly, dyspareunia  
9 related to endometriosis may lead some women to avoid intimate relationships, which may have  
10 downstream implications for marriage, family planning, and mental and emotional health.<sup>21,22</sup>  
11 Cumulatively, persistent symptoms of endometriosis and their impact on daily activities and  
12 family and intimate relationships can negatively impact the trajectory of women's lives and are  
13 profound and far reaching.  
14  
15  
16  
17  
18  
19  
20  
21  
22  
23  
24  
25  
26  
27

28 Examining the cumulative life-course impact of endometriosis may have an influence on a  
29 physician's ability to understand a woman's complete experience with the disease, help identify  
30 patients who are most vulnerable to its impacts, and inform options for management.<sup>18,20,23,24</sup> A  
31 fuller understanding of the life-course impact of endometriosis may also elucidate patterns of  
32 patient needs and identify forms of supportive multidisciplinary care necessary, including the  
33 need for early referral to specialists and other professionals who provide complementary  
34 healthcare. These needs are likely to change over time, during different phases of each  
35 patient's life. For example, teams that include gynecologists and pain specialists may help  
36 patients manage endometriosis-associated pain symptoms; reproductive endocrinologists may  
37 help manage infertility, if this occurs; sexual health counselors may collaborate with patients  
38 who have dyspareunia; and counselors/psychologists may assist with chronic stress and mental  
39 health issues.<sup>25</sup> Physicians who are responsive to patients' individual needs and values can  
40 positively support overall quality of life in those patients who experience infertility<sup>26,27</sup> and  
41 endometriosis.<sup>21</sup>  
42  
43  
44  
45  
46  
47  
48  
49  
50  
51  
52  
53  
54  
55  
56  
57  
58  
59  
60

1  
2  
3 The objective of this multinational survey was to gain a better understanding of patient  
4 perspectives on how endometriosis impacts their daily activities and identify how the disease  
5 may influence women's major life decisions and attainment of their goals.  
6  
7  
8  
9

## 10 11 **METHODS**

### 12 13 14 15 **Ethics approval**

16  
17 The Advarra Institutional Review Board (Columbia, MD, USA) reviewed the cross-sectional  
18 survey for participants in the United States (exempt determination #Pro00029982,  
19 26 September 2018). Informed consent was not obtained due to the exempt nature of this  
20 survey; however, participants did consent to participate in a survey and email invitations were  
21 provided to people who opted to receive communications.  
22  
23  
24  
25  
26  
27  
28  
29  
30  
31

### 32 33 **Survey development**

34  
35 An online survey was created in a collaborative effort between AbbVie (North Chicago, IL, USA)  
36 and MyHealthTeams (San Francisco, CA, USA), a company that creates social networks for  
37 communities of individuals living with chronic conditions to foster discussion and provide support  
38 among people facing similar circumstances. The survey was provided in English and was  
39 available online from October 3 through October 25, 2018. The 14 survey questions about  
40 women's experiences with endometriosis were based on our knowledge about the disease  
41 state, existing publications, and online conversations participants were having (**see Patient and**  
42 **public Involvement** for further details). In addition, the survey contained 4 screening questions  
43 and 6 demographic questions (identified as Supporting Information). The primary goal of the  
44 survey was to capture patients' perspectives on the negative impact of endometriosis on  
45  
46  
47  
48  
49  
50  
51  
52  
53  
54  
55  
56  
57  
58  
59  
60

1  
2  
3 different aspects of their life course, including how endometriosis has affected their work,  
4 education, relationships, overall life decisions, and attainment of goals. This portion of the  
5 survey was modeled after a validated instrument created to measure life-course impact of  
6 disease in patients with psoriasis.<sup>22</sup> Survey questions were rotated to avoid any bias introduced  
7 by order-of-answer selections. Most survey questions were closed-ended and provided multiple-  
8 choice options to participants; two questions were open-ended and allowed participants to  
9 provide written responses detailing any life accomplishments they believed were impeded by  
10 endometriosis or to offer anything else they wanted to share about the impact endometriosis  
11 had on their lives. The survey used in this study is included in the supplementary material.  
12  
13  
14  
15  
16  
17  
18  
19  
20  
21  
22  
23

#### 24 **Patient and public involvement**

25  
26  
27  
28 Survey questions were developed based on organic conversations members were having on  
29 MyEndometriosisTeam.com to ensure both relevance of topics and patient-focused language,  
30 and then piloted with several individuals for qualitative feedback. The social media network,  
31 MyEndometriosisTeam.com was developed for women living with endometriosis and consists of  
32 more than 108,000 members across 13 countries. Based on institutional review board  
33 exemption requirements, people were asked at the beginning of the survey if they agreed to  
34 participate, and email invitations were sent only to those people who opted into receiving  
35 communications.  
36  
37  
38  
39  
40  
41  
42  
43  
44  
45  
46

#### 47 **Participant eligibility and recruitment**

48  
49  
50  
51 Members of the social network MyEndometriosisTeam.com were recruited through 33,000 email  
52 invitations. Invitations posted on the public Facebook page for MyEndometriosisTeam.com  
53 recruited additional women to participate in the survey, which was live from October 3 to  
54  
55  
56  
57  
58  
59  
60

1  
2  
3 October 25, 2018. The English-language survey was conducted among an international  
4 population of women who were at least 19 years of age and who self-identified as having  
5 endometriosis. The survey was anonymous, and answers could not be linked to individual  
6 members.  
7  
8  
9  
10

## 11 12 13 **Survey analysis**

14  
15  
16  
17 Descriptive statistics were used to tabulate survey responses in this cross-sectional study. After  
18 descriptive statistics were quantified for all respondents, a subanalysis was performed that  
19 restricted the survey responder population to women who “somewhat agreed” or “strongly  
20 agreed” that they were “less positive about the future” (LPAF) or that they “had not reached their  
21 full potential” (NRFP) because of endometriosis. These two questions were selected for this  
22 subanalysis to focus on the life-course impact attributed to endometriosis as identified by those  
23 who reported low optimism or low goal attainment.  
24  
25  
26  
27  
28  
29  
30  
31  
32  
33

## 34 **RESULTS**

### 35 36 37 **Survey response and demographics**

38  
39  
40  
41  
42 A total of 743 women completed the survey (table 1), which was live from October 3 to October  
43 25, 2018.  
44  
45  
46  
47  
48

49 Among respondents to the English-language survey, 474 (64%) were from the United States,  
50 and 269 (36%) were from other countries, including one-fifth from the United Kingdom (17%),  
51 and one-fifth summed from Canada, Australia, South Africa, Ireland, New Zealand, and The  
52 Netherlands (table 1). Most women were younger than age 40 years. Almost half of the  
53  
54  
55  
56  
57  
58  
59  
60

Missmer SA, *et al*

---

1  
2  
3 respondents were unaware of their stage of endometriosis (according to the rASRM scoring  
4 system), which was obtained at their most recent surgery (48%). Among the 52% respondents  
5 who recalled knowing their rASRM score, most reported having stage 4 (table 1).  
6  
7  
8  
9  
10  
11  
12  
13  
14  
15  
16  
17  
18  
19  
20  
21  
22  
23  
24  
25  
26  
27  
28  
29  
30  
31  
32  
33  
34  
35  
36  
37  
38  
39  
40  
41  
42  
43  
44  
45  
46  
47  
48  
49  
50  
51  
52  
53  
54  
55  
56  
57  
58  
59  
60

**Table 1** Demographics and burden of endometriosis

| Characteristic                        | Respondents, n (%)<br>(N=743) |
|---------------------------------------|-------------------------------|
| Age at time of survey, years          |                               |
| 19–29                                 | 206 (28)                      |
| 30–39                                 | 339 (46)                      |
| 40–49                                 | 180 (24)                      |
| 50 or older                           | 18 (2)                        |
| Country                               |                               |
| United States (excluding Puerto Rico) | 474 (64)                      |
| United Kingdom                        | 128 (17)                      |
| Canada                                | 38 (5)                        |
| Australia                             | 37 (5)                        |
| South Africa                          | 20 (3)                        |
| Ireland                               | 17 (2)                        |
| Other                                 | 15 (2)                        |
| New Zealand                           | 11 (1)                        |
| The Netherlands                       | 3 (0.4)                       |
| Level of education                    |                               |
| Some high school or less              | 33 (4)                        |
| High school diploma                   | 111 (15)                      |
| Some college                          | 214 (29)                      |
| College degree                        | 254 (34)                      |
| Graduate school/degree                | 111 (15)                      |
| Prefer not to answer                  | 20 (3)                        |
| Endometriosis stage                   |                               |
| Stage 1                               | 33 (4)                        |
| Stage 2                               | 39 (5)                        |
| Stage 3                               | 93 (13)                       |
| Stage 4                               | 223 (30)                      |
| Not sure                              | 355 (48)                      |
| Method of diagnosis                   |                               |
| Laparoscopic surgery                  | 650 (87)                      |
| Clinical only                         | 87 (12)                       |
| Not sure                              | 6 (0.8)                       |

## Diagnosis and symptoms

### *Diagnosis*

Women began experiencing symptoms of endometriosis at a young age, with many experiencing symptoms by age 15. Most women reported having a diagnosis of endometriosis made several years after the appearance of symptoms, on average approximately 9 years. Nearly half of women (42%) said it took 10 years or longer after the initial onset of their symptoms to receive a surgical or clinical diagnosis of endometriosis. The delay was longer the younger the woman's age at symptom onset; it took an average of 13 years to surgical diagnosis for women who began experiencing symptoms by age 13. Most women reported their diagnosis had been confirmed by laparoscopy (table 1).

### *Endometriosis-associated pain*

Most women (56%) reported experiencing pain daily, and nearly an additional one-quarter of women reported feeling endometriosis-associated pain a few times per week. When asked to rate how severe their pain was in the last 12 months on a scale from 0 (no pain) to 10 (worst imaginable pain), more than half of the respondents (54%) rated their worst pain within the last 12 months as a 9 or 10. About two-thirds of women reported their endometriosis-associated pain had worsened over the years when asked if endometriosis-related pain had gotten better, worse, or stayed the same.

## Life-course impairment

### *Education and employment potential*

Many of the women surveyed (40%) said they “somewhat agreed” or “strongly agreed” that they had experienced difficulties achieving their educational goals or had missed school (55%) because of endometriosis-associated symptoms (figure 1A). Almost half of participants (45%) “somewhat agreed” or “strongly agreed” that they could not work full time, and a similar percentage (47%) reported not working at a job they would have preferred. Most reported that they had missed work (74%) or earned less money than they could have (54%) because of endometriosis-associated symptoms.

### *Relationships and social engagements*

Most women (83%) “somewhat agreed” or “strongly agreed” that endometriosis-associated symptoms led to problems in their intimate relationships and/or created a barrier to starting a family (58%). Most women similarly believed that endometriosis-associated symptoms had led them to limit their social activities (82%), made them less outgoing (81%), and caused them to travel less (59%) (figure 1B).

### *Physical well-being*

Most women “somewhat agreed” or “strongly agreed” endometriosis limited their ability to stay active (79%) and maintain a healthy diet (55%) (figure 1C). A high proportion of women (43%) perceived that endometriosis-associated symptoms resulted in use of alcohol, drugs, or cigarettes.



### *Life-course impairment overall*

Overall, most women (80%) “somewhat agreed” or “strongly agreed” endometriosis-associated symptoms had caused them to lose time from their daily lives (figure 1D). A similar number of women reported that they were less positive about the future because of their endometriosis-associated symptoms (80%), and 75% “somewhat agreed” or “strongly agreed” that endometriosis-associated symptoms had kept them from reaching their full potential in life.

### **Experiences and emotions associated with endometriosis**

Women reported that numerous experiences attributed to endometriosis had altered their life potential in a negative way (figure 2A) or negatively impacted their lives in other ways (figure 2B). The most frequent responses were common symptoms of endometriosis, including pelvic pain apart from menstruation, painful menstruation, pelvic pain during menstruation, and painful sexual intercourse.

Most women surveyed reported that endometriosis impacted their ability to perform daily tasks. However, many of the negative experiences attributed to endometriosis were related to the use of healthcare services and treatments. For example, women reported taking prescription pain medications, visiting emergency departments, having multiple surgeries, being hospitalized overnight, taking prescription medication for depression or anxiety, or seeing a mental health professional because of their endometriosis-associated symptoms. Around half the women surveyed reported that the experiences that had the most negative impact on their lives were their need to take prescription medication and the multiple surgeries for endometriosis. In addition, most women surveyed reported several negative emotions that they attributed to endometriosis, including feeling depressed, anxious, unsexy, or having low self-esteem (figure 2C).

1  
2  
3 Women managed the impact of their endometriosis in different ways (figure 2D). Most  
4 commonly this included talking to a spouse or partner about their condition, using non-medical  
5 strategies such as diet or exercise to control their pain and seeking support from friends and  
6 family.  
7  
8  
9  
10

### 11 12 13 **Additional analysis of women who believed their future and life potential were more** 14 **impacted by endometriosis** 15

16  
17  
18 Most of the sample included women who “somewhat agreed” or “strongly agreed” they were  
19 LPAF (79%; n=589) or had NRFP in life (75%; n=556) because of endometriosis, and several  
20 questions limited to these women were further analyzed (Supporting Information table 1).  
21  
22

23 Overall, women who believed they were LPAF or had NRFP reported more negative  
24 experiences compared with the fewer respondents who did not indicate they were LPAF (non-  
25 LPAF, 21%; n=154) or had NRFP (non-NRFP, 25%; n=187). Daily pain was reported by a  
26 higher proportion of women who believed they were LPAF or had NRPF because of  
27 endometriosis compared with other women (62% LPAF vs 34% non-LPAF; 61% NRFP vs 40%  
28 non-NRFP; Supporting Information table 1A). More women who believed they were LPAF or  
29 had NRFP also reported negative experiences related to education and work they attributed to  
30 endometriosis, including having earned less money (61% LPAF vs 29% non-LPAF; 66% NRFP  
31 vs 21% non-NRFP), not working a preferred job (54% LPAF vs 25% non-LPAF; 58% NRFP vs  
32 17% non-NRFP), or not achieving educational goals (44% LPAF vs 21% non-LPAF; 47% NRFP  
33 vs 16% non-NRFP) (Supporting Information table 1B). A higher proportion of women who  
34 believed their future and life potential were more impacted by their disease reported  
35 endometriosis-related experiences altered their life potential in a negative way (Supporting  
36 Information table 1C). Similarly, more of these women reported negative experiences and  
37  
38  
39  
40  
41  
42  
43  
44  
45  
46  
47  
48  
49  
50  
51  
52  
53  
54  
55  
56  
57  
58  
59  
60

1  
2  
3 emotions they attributed to endometriosis (Supporting Information table 1D, E). All women used  
4 similar strategies to cope with and mitigate the impact of endometriosis on their lives  
5  
6  
7 (Supporting Information table 1F).  
8  
9

## 11 **DISCUSSION**

12  
13  
14  
15  
16 A survey of women with endometriosis who self-reported pronounced symptoms also reported  
17 experiences that were perceived by them to negatively impact their views of the future and  
18 overall life potential. For many women, endometriosis-associated symptoms negatively affect  
19 various areas of their lives, including education and employment, relationships and social  
20 engagements, and physical well-being. Participants indicated that adverse experiences related  
21 to management of their disease and its impact on everyday life also believed that their future  
22 and life potential was negatively impacted by endometriosis.  
23  
24  
25  
26  
27  
28  
29

30  
31  
32 The severity of pain reported by women who completed the online survey indicates that  
33 respondents in our study may have had a greater symptom burden than did women participating  
34 in previous studies using similar pain scales.<sup>28-30</sup> Women in our study also reported slightly  
35 lengthier delays in diagnosis after the onset of their first symptoms. Findings in previous studies  
36 have illustrated that delays are common in diagnosing endometriosis.<sup>13,31-39</sup> Although some  
37 recent literature suggests that the delay in diagnosis may be slowly improving,<sup>37</sup> the use of non-  
38 invasive and accurate diagnostic tools could improve diagnosis times and reduce women's pain  
39 and distress.<sup>39,40</sup> The delays in diagnosis reported by our study participants and others indicate  
40 many women experiencing troublesome symptoms of endometriosis may still wait extended  
41 periods before receiving a definitive diagnosis and initiating treatment.  
42  
43  
44  
45  
46  
47  
48  
49  
50  
51  
52  
53  
54  
55  
56  
57  
58  
59  
60

1  
2  
3 The higher pain burden and longer diagnostic delay reported in our sample, which may include  
4 higher numbers of women who sought social network support because they were more  
5 frustrated with their disease experience, could conceivably be due in part to their longer  
6 struggles with more challenging symptoms than would be observed in the general population of  
7 women with diagnosed endometriosis. Results from a recent study using the same social  
8 network to recruit participants found that the majority of respondents rated their worst pain  
9 higher than 7 on a 10-point scale, only a little lower than the pain rating given by the women in  
10 our study.<sup>41</sup> Additionally, the previous study participants also experienced a diagnostic delay,  
11 supporting the theory that recruitment from this member-centered network may draw more  
12 women who have struggled longer with their disease.<sup>41</sup> Interestingly, overall trends in diagnostic  
13 delays observed between age groups in our study are consistent with reports in previous  
14 research, that being women whose symptom onset was at a younger age experienced longer  
15 times to diagnosis.<sup>13,33,37</sup>

16  
17  
18  
19  
20  
21  
22  
23  
24  
25  
26  
27  
28  
29  
30  
31  
32  
33 Many respondents said they missed school and were generally unable to achieve their  
34 educational goals because of endometriosis. There is a dearth of research on the impact of  
35 endometriosis on women's educational aspirations and their ability to achieve goals due to  
36 endometriosis-associated symptoms compared with the impact endometriosis has on  
37 professional work or other areas of life.<sup>9</sup> Findings from some existing studies suggest  
38 endometriosis-associated symptoms may impact grades, attendance, or completion of  
39 educational programs.<sup>19,20,42</sup> Although informative, these studies were more qualitative in nature  
40 and involved small sample sizes.<sup>19,20,42</sup> A quantitative study examining the lives of 78 women  
41 15 years after receiving a verified diagnosis of endometriosis found only a fraction of women  
42 reported that their disease had a negative impact on their education.<sup>11</sup> However, the women  
43 included in that study seemed to report less frequent pain and endometriosis-related effects like  
44 depression compared with the reports made by women in our study. Furthermore, the small

1  
2  
3 sample was collected at a single Norwegian hospital and the findings may not be representative  
4 of women's experiences with endometriosis on a wider scale.<sup>11</sup> Regardless, any impact on  
5 education is concerning, and our study results emphasize the need for additional research into  
6 this overlooked area in women with endometriosis. Research on other medical conditions, like  
7 adolescent fibromyalgia, supports that chronic pain can negatively impact education, reinforcing  
8 the likelihood that endometriosis may have a similar impact.<sup>43,44</sup>  
9  
10  
11  
12  
13  
14  
15  
16  
17

18 Respondents in the current study also reported endometriosis-associated symptoms caused  
19 them to miss work, earn less money, prevented them from a job they would have preferred, or  
20 impeded their working full time or part time. Many health conditions that can occur with  
21 endometriosis can impact work productivity and potential, including depression, other chronic  
22 pain conditions or disorders, and digestive disorders.<sup>45</sup> Endometriosis was self-reported by  
23 respondents in this study, and it is possible that other chronic conditions (particularly, chronic  
24 overlapping pain conditions) may also contribute to women's perceived interference with  
25 productivity and employment opportunities. Indeed, more than half of women with symptomatic  
26 endometriosis can present with comorbid pain syndromes,<sup>46</sup> and these may include conditions  
27 associated with pelvic pain, like dysmenorrhea, irritable bowel syndrome, or painful bladder  
28 syndrome.<sup>47,48</sup> However, findings from previous studies have illustrated that endometriosis-  
29 associated symptoms may lead to losses in productivity both at home and in the workplace,  
30 potentially impacting professional achievement.<sup>12,36,49,50</sup> In our study, higher proportions of  
31 women who indicated that they were LPAF or had NRFP because of endometriosis reported  
32 painful symptoms and negative experiences compared with other respondents. Also, women  
33 who were LPAF or had NRFP more often believed it was harder for them to perform daily tasks  
34 because of their disease.  
35  
36  
37  
38  
39  
40  
41  
42  
43  
44  
45  
46  
47  
48  
49  
50  
51  
52  
53  
54  
55  
56  
57  
58  
59  
60

1  
2  
3 Our results further support that endometriosis symptoms are disruptive and may lead to loss of  
4 productivity, ultimately influencing women's major life decisions or consequences, including  
5 whether to work at reduced capacity or pursue preferred jobs. Results from a recent multicenter  
6 study of women with confirmed endometriosis and a matched comparison group found the  
7 disease forced some women to seek work outside desired professions, which, in turn, resulted  
8 in health-related limitations in career choices.<sup>50</sup> These collective findings are concerning,  
9 because satisfaction in a chosen profession—or at a minimum options available to make life  
10 decisions regarding one's profession—is an important component of an overall satisfying quality  
11 of life, and the decision to work less or pursue a less desirable job may have downstream  
12 implications for women's finances, relationships, social lives, or travel decisions.<sup>17,50</sup>  
13  
14  
15  
16  
17  
18  
19  
20  
21  
22  
23  
24  
25

26 Respondents to our survey reported endometriosis had a negative impact on their relationships;  
27 social engagements; and ability to have children, when desired, which is consistent with findings  
28 from a host of previous studies demonstrating the negative impact of endometriosis on social  
29 well-being and health-related quality of life.<sup>9,12,36,49</sup> Interestingly, 46% of women in our study who  
30 reported experiencing infertility is slightly higher than the 14%–40% range reported in previous  
31 studies, again hinting at our population's higher symptom burden.<sup>36,41,51</sup> Other chronic pain  
32 conditions have also impacted these life-course components, including conditions related to  
33 musculoskeletal pain and chronic back pain.<sup>52,53</sup>  
34  
35  
36  
37  
38  
39  
40  
41  
42  
43

44 Similar to decisions involving education and professional achievement, life choices involving the  
45 pursuit of intimate relationships or starting a family may have downstream implications in other  
46 areas, like finance, psychological well-being, or employment, which may have their own  
47 downstream impacts on additional aspects of a person's life course.<sup>17</sup> Likewise, women  
48 frequently reported not being physically active and having poorer diets because of their disease.  
49 Although few studies have examined this aspect of endometriosis, findings from two smaller  
50  
51  
52  
53  
54  
55  
56  
57  
58  
59  
60

1  
2  
3 studies have suggested that pain associated with the disease may also have a negative impact  
4 on exercise and nutrition.<sup>9,32,54</sup>  
5  
6  
7

8  
9 Of particular concern was the view of many women that their disease made them increase their  
10 use of alcohol, drugs, or cigarettes. Research into whether pain and experiences related to  
11 endometriosis may be associated with higher rates of substance abuse is severely lacking.  
12  
13 However, there are demonstrated associations between other chronic pain conditions and  
14 substance abuse that support our finding.<sup>55,56</sup> Results from our study draw attention to this issue  
15 and highlight substance abuse as an important avenue for additional investigations.  
16  
17  
18  
19  
20  
21  
22  
23

24 Findings from our study indicate that women with endometriosis may experience many  
25 healthcare-related side effects. Of particular concern, patients noted that treatments meant to  
26 help reduce the burden of endometriosis may have their own negative impact. Many women  
27 perceived that use of prescription medications and multiple surgeries to control the symptoms of  
28 endometriosis had a negative impact on their life potential, and this response was stronger in  
29 women who indicated they were LPAF or believed they had NRFP due to their disease. Results  
30 from one recent study showed that medical treatment for a condition may increase a patient's  
31 stress levels and potentially affect their psychological health.<sup>57</sup> Patients who were taking  
32 prescription medications and who experienced more challenging adverse effects from their  
33 therapies had higher perceived stress levels, and women undergoing multiple surgeries were  
34 especially impacted. These reports underscore the potential value of supportive psychological  
35 care for patients with endometriosis as part of effective long-term disease management.  
36  
37  
38  
39  
40  
41  
42  
43  
44  
45  
46  
47  
48  
49  
50

51 In general, women experienced a range of consequences that they attributed to living with and  
52 managing the limitations imposed by endometriosis. While each woman experienced the impact  
53 of endometriosis differently, the majority believed that they were living life less fully than they  
54  
55  
56  
57  
58  
59  
60

1  
2  
3 could have because of their endometriosis-associated symptoms. This belief was informed by  
4 the symptoms and healthcare requirements they faced, and, in turn, may have influenced major  
5 life decisions that could have their own deleterious effects on personal fulfillment and life  
6 potential. The interconnectedness of effects triggered by major life decisions highlights the  
7 importance of conducting further research into the cumulative burden of debilitating diseases  
8 like endometriosis within the context of an individual's life course.  
9  
10  
11  
12  
13  
14  
15  
16  
17  
18  
19  
20  
21  
22  
23  
24  
25  
26  
27  
28  
29  
30  
31  
32  
33  
34  
35  
36  
37  
38  
39  
40  
41  
42  
43  
44  
45  
46  
47  
48  
49  
50  
51  
52  
53  
54  
55  
56  
57  
58  
59  
60



**CONCLUSIONS**

Most women in our international survey experienced a high burden associated with the disease and reported that endometriosis-associated pain and associated experiences had a negative impact on their outlook about their future and overall life potential. Women believed endometriosis impacted life decisions surrounding education, their professional lives, their social lives, and their physical well-being. Our study of the impact of endometriosis on a woman's life course helps provide a clearer understanding of her complete experience with their disease. Our findings also suggest there is a need to develop early, effective treatments and to provide access to effective treatment to limit the impact of endometriosis on a woman's life course.

1  
2  
3 **Acknowledgements** Financial assistance in developing the survey and collecting data was  
4 provided by AbbVie. In partnership with MyHealthTeams, AbbVie participated in the  
5 interpretation of data, review, and approval of the manuscript, and was involved in the decision  
6 to submit the manuscript for publication. Medical writing support, funded by AbbVie, was  
7 provided by Michael M. Schofield, PhD, and Kersten Reich, MPH, CMPP™, of JB Ashtin, who  
8 developed the first draft based on an author-approved outline and assisted in implementing  
9 author revisions.  
10  
11  
12  
13  
14  
15  
16  
17  
18  
19

20 **Contributors:** SAM, FT, OAF, AH, BS, and SA-S contributed to the study concept and design.  
21 BS contributed to data acquisition and statistical analysis. SAM, FT, AMS, SEC, SC, SE, OAF,  
22 AH, BS, and SA-S contributed to data interpretation.  
23  
24  
25  
26  
27

28 **Funding** Financial support for this study was provided by AbbVie Inc. Award/Grant number is  
29 not applicable.  
30  
31  
32  
33  
34  
35

36 **Competing interests** SA Missmer is a consultant for AbbVie, Oratel Diagnostics, and Celmatix,  
37 and receives research support from the National Institutes of Health, Department of Defense,  
38 and the Marriott Family Foundations.  
39  
40  
41  
42  
43

44 FF Tu has received research support from NICHD-NIH, NIDDK-NIH, earns royalties from  
45 UpToDate, and has served as a consultant for AbbVie, Myovant, and Uroshape.  
46  
47  
48  
49

50 AM Soliman, S Chiuve, S Cross, S Eichner, and O Antunez Flores are employees of AbbVie  
51 and may own AbbVie stocks/stock options.  
52  
53  
54  
55  
56  
57  
58  
59  
60

Missmer SA, *et al*

---

1  
2  
3 A Horne has received grant funding from the UK MRC, NIHR, CSO, Wellbeing of Women,  
4 Ferring, Astra Zeneca, the Charles Wolfson Charitable Trust, and Standard Life. His institution  
5  
6 has received consultancy fees from Roche Diagnostics, Nordic Pharma, Ferring and AbbVie. He  
7  
8 is Chair of the RCOG Academic Board, ESHRE National Representative for the UK, WES  
9  
10 Board Member and Ambassador, SEUD Board Member, Trustee and Medical Advisor to  
11  
12 Endometriosis UK, and Medical Advisor to Pelvic Pain Support Network.  
13  
14  
15

16  
17  
18 B Schneider is an employee of MyHealthTeams, which received compensation for the study,  
19  
20 and conducted the research on behalf of AbbVie.  
21  
22  
23

24 S As-Sanie earns author royalties from UpToDate, and has served as a consultant for AbbVie,  
25  
26 Myovant, and Eximis.  
27  
28  
29

### 30 **Data Sharing Statement**

31  
32  
33 AbbVie is committed to responsible data sharing regarding the clinical trials and  
34  
35 studies we sponsor. This includes access to anonymized, individual and trial-level data  
36  
37 (analysis data sets), as well as other information (eg, protocols and clinical study  
38  
39 reports), as long as the trials are not part of an ongoing or planned regulatory  
40  
41 submission. This includes requests for clinical trial data for unlicensed products and  
42  
43 indications.  
44  
45  
46

47 This study data can be requested by any qualified researchers who engage in rigorous,  
48  
49 independent scientific research, and will be provided following review and approval of a  
50  
51 research proposal and statistical analysis plan and execution of a data sharing  
52  
53 agreement. Data requests can be submitted at any time and the data will be accessible  
54  
55 for 12 months, with possible extensions considered. For more information on the  
56  
57  
58  
59  
60

1  
2  
3 process, or to submit a request, visit the following link: [https://www.abbvie.com/our-](https://www.abbvie.com/our-science/clinical-trials/clinical-trials-data-and-information-sharing/data-and-information-sharing-with-qualified-researchers.html)  
4  
5 science/clinical-trials/clinical-trials-data-and-information-sharing/data-and-information-  
6  
7 sharing-with-qualified-researchers.html.  
8  
9

### 11 **License Statement:**

12  
13  
14  
15  
16 I, the Submitting Author has the right to grant and does grant on behalf of all authors of the  
17  
18 Work (as defined in the below author licence), an exclusive licence and/or a non-exclusive  
19  
20 licence for contributions from authors who are: i) UK Crown employees; ii) where BMJ has  
21  
22 agreed a CC-BY licence shall apply, and/or iii) in accordance with the terms applicable for US  
23  
24 Federal Government officers or employees acting as part of their official duties; on a worldwide,  
25  
26 perpetual, irrevocable, royalty-free basis to BMJ Publishing Group Ltd ("BMJ") its licensees and  
27  
28 where the relevant Journal is co-owned by BMJ to the co-owners of the Journal, to publish the  
29  
30 Work in BMJ Open and any other BMJ products and to exploit all rights, as set out in  
31  
32 our licence.  
33  
34  
35  
36

37 The Submitting Author accepts and understands that any supply made under these terms is  
38  
39 made by BMJ to the Submitting Author unless you are acting as an employee on behalf of your  
40  
41 employer or a postgraduate student of an affiliated institution which is paying any applicable  
42  
43 article publishing charge ("APC") for Open Access articles. Where the Submitting Author wishes  
44  
45 to make the Work available on an Open Access basis (and intends to pay the relevant APC),  
46  
47 the terms of reuse of such Open Access shall be governed by a Creative Commons licence –  
48  
49 details of these licences and which Creative Commons licence will apply to this Work are set out  
50  
51 in our licence referred to above.  
52  
53  
54  
55  
56  
57  
58  
59  
60

**REFERENCES**

1. Zondervan KT, Becker CM, Missmer SA. Endometriosis. *N Engl J Med* 2020;382:1244-56.
2. Kennedy S, Bergqvist A, Chapron C, *et al*. ESHRE guideline for the diagnosis and treatment of endometriosis. *Hum Reprod* 2005;20:2698-704.
3. Practice bulletin no. 114: management of endometriosis. *Obstet Gynecol* 2010;116:223-36.
4. Zondervan KT, Becker CM, Koga K, *et al*. Endometriosis. *Nat Rev Dis Primers* 2018;4:9.
5. De Graaff AA, D'Hooghe TM, Dunselman GA, *et al*. The significant effect of endometriosis on physical, mental and social wellbeing: results from an international cross-sectional survey. *Hum Reprod* 2013;28:2677-85.
6. Gallagher JS, DiVasta AD, Vitonis AF, *et al*. The Impact of Endometriosis on Quality of Life in Adolescents. *J Adolesc Health* 2018;63:766-72.
7. Lagana AS, La Rosa VL, Rapisarda AMC, *et al*. Anxiety and depression in patients with endometriosis: impact and management challenges. *Int J Womens Health* 2017;9:323-30.
8. Vannuccini S, Lazzeri L, Orlandini C, *et al*. Mental health, pain symptoms and systemic comorbidities in women with endometriosis: a cross-sectional study. *J Psychosom Obstet Gynaecol* 2018;39:315-20.
9. Culley L, Law C, Hudson N, *et al*. A qualitative study of the impact of endometriosis on male partners. *Hum Reprod* 2017;32:1667-73.
10. Denny E, Mann CH. Endometriosis-associated dyspareunia: the impact on women's lives. *J Fam Plann Reprod Health Care* 2007;33:189-93.

11. Fagervold B, Jenssen M, Hummelshoj L, *et al*. Life after a diagnosis with endometriosis - a 15 years follow-up study. *Acta Obstet Gynecol Scand* 2009;88:914-9.
12. Soliman AM, Coyne KS, Gries KS, *et al*. The Effect of Endometriosis Symptoms on Absenteeism and Presenteeism in the Workplace and at Home. *J Manag Care Spec Pharm* 2017;23:745-54.
13. Klein S, D'Hooghe T, Meuleman C, *et al*. What is the societal burden of endometriosis-associated symptoms? a prospective Belgian study. *Reprod Biomed Online* 2014;28:116-24.
14. Simoens S, Dunselman G, Dirksen C, *et al*. The burden of endometriosis: costs and quality of life of women with endometriosis and treated in referral centres. *Hum Reprod* 2012;27:1292-9.
15. Soliman AM, Taylor HS, Bonafede M, *et al*. Incremental direct and indirect cost burden attributed to endometriosis surgeries in the United States. *Fertil Steril* 2017;107:1181-90 e2.
16. Soliman AM, Yang H, Du EX, *et al*. The direct and indirect costs associated with endometriosis: a systematic literature review. *Hum Reprod* 2016;31:712-22.
17. Bhatti Z, Salek M, Finlay A. Chronic diseases influence major life changing decisions: a new domain in quality of life research. *J R Soc Med* 2011;104:241-50.
18. Kimball AB, Gieler U, Linder D, *et al*. Psoriasis: is the impairment to a patient's life cumulative? *J Eur Acad Dermatol Venereol* 2010;24:989-1004.
19. Huntington A, Gilmour JA. A life shaped by pain: women and endometriosis. *J Clin Nurs* 2005;14:1124-32.
20. Moradi M, Parker M, Sneddon A, *et al*. Impact of endometriosis on women's lives: a qualitative study. *BMC Womens Health* 2014;14:123.

- 1  
2  
3  
4 21. Apers S, Dancet EAF, Aarts JWM, *et al*. The association between experiences with patient-  
5 centred care and health-related quality of life in women with endometriosis. *Reprod Biomed*  
6 *Online* 2018;36:197-205.  
7  
8  
9  
10 22. Witzeman K, Antunez Flores O, Renzelli-Cain RI, *et al*. Patient-Physician Interactions  
11 Regarding Dyspareunia with Endometriosis: Online Survey Results. *J Pain Res*  
12 2020;13:1579-89.  
13  
14  
15  
16 23. Culley L, Law C, Hudson N, *et al*. The social and psychological impact of endometriosis on  
17 women's lives: a critical narrative review. *Hum Reprod Update* 2013;19:625-39.  
18  
19  
20  
21 24. Oehmke F, Weyand J, Hackethal A, *et al*. Impact of endometriosis on quality of life: a pilot  
22 study. *Gynecol Endocrinol* 2009;25:722-5.  
23  
24  
25  
26 25. Ugwumadu L, Chakrabarti R, Williams-Brown E, *et al*. The role of the multidisciplinary team  
27 in the management of deep infiltrating endometriosis. *Gynecol Surg* 2017;14:15.  
28  
29  
30  
31 26. Aarts JW, Huppelschoten AG, van Empel IW, *et al*. How patient-centred care relates to  
32 patients' quality of life and distress: a study in 427 women experiencing infertility. *Hum*  
33 *Reprod* 2012;27:488-95.  
34  
35  
36  
37  
38 27. Gameiro S, Canavarro MC, Boivin J. Patient centred care in infertility health care: direct and  
39 indirect associations with wellbeing during treatment. *Patient Educ Couns* 2013;93:646-54.  
40  
41  
42  
43 28. Bourdel N, Alves J, Pickering G, *et al*. Systematic review of endometriosis pain assessment:  
44 how to choose a scale? *Hum Reprod Update* 2015;21:136-52.  
45  
46  
47  
48 29. Chawla S. Treatment of Endometriosis and Chronic Pelvic Pain with Letrozole and  
49 Norethindrone Acetate. *Med J Armed Forces India* 2010;66:213-5.  
50  
51  
52  
53  
54  
55  
56  
57  
58  
59  
60

- 1  
2  
3 30. Facchin F, Barbara G, Saita E, *et al*. Impact of endometriosis on quality of life and mental  
4 health: pelvic pain makes the difference. *J Psychosom Obstet Gynaecol* 2015;36:135-41.  
5  
6  
7  
8 31. Ballard K, Lowton K, Wright J. What's the delay? A qualitative study of women's experiences  
9 of reaching a diagnosis of endometriosis. *Fertil Steril* 2006;86:1296-301.  
10  
11  
12  
13 32. Bernuit D, Ebert AD, Halis G, *et al*. Female perspectives on endometriosis: findings from the  
14 uterine bleeding and pain women's research study. *Journal of Endometriosis* 2011;3:73-85.  
15  
16  
17  
18 33. Greene R, Stratton P, Cleary SD, *et al*. Diagnostic experience among 4,334 women  
19 reporting surgically diagnosed endometriosis. *Fertil Steril* 2009;91:32-9.  
20  
21  
22  
23 34. Hadfield R, Mardon H, Barlow D, *et al*. Delay in the diagnosis of endometriosis: a survey of  
24 women from the USA and the UK. *Hum Reprod* 1996;11:878-80.  
25  
26  
27  
28 35. Hudelist G, Fritzer N, Thomas A, *et al*. Diagnostic delay for endometriosis in Austria and  
29 Germany: causes and possible consequences. *Hum Reprod* 2012;27:3412-6.  
30  
31  
32  
33 36. Nnoaham KE, Hummelshoj L, Webster P, *et al*. Impact of endometriosis on quality of life  
34 and work productivity: a multicenter study across ten countries. *Fertil Steril* 2011;96:366-73  
35 e8.  
36  
37  
38  
39 37. Soliman AM, Fuldeore M, Snabes MC. Factors Associated with Time to Endometriosis  
40 Diagnosis in the United States. *J Womens Health (Larchmt)* 2017;26:788-97.  
41  
42  
43  
44 38. Staal AH, van der Zanden M, Nap AW. Diagnostic Delay of Endometriosis in the  
45 Netherlands. *Gynecol Obstet Invest* 2016;81:321-4.  
46  
47  
48  
49 39. Nnoaham KE, Hummelshoj L, Kennedy SH, *et al*. Developing symptom-based predictive  
50 models of endometriosis as a clinical screening tool: results from a multicenter study. *Fertil*  
51 *Steril* 2012;98:692-701 e5.  
52  
53  
54  
55  
56  
57  
58  
59  
60



- 1  
2  
3 40. Brosens I, Puttemans P, Campo R, *et al*. Non-invasive methods of diagnosis of  
4 endometriosis. *Curr Opin Obstet Gynecol* 2003;15:519-22.  
5  
6  
7  
8 41. Lamvu G, Antunez-Flores O, Orady M, *et al*. Path to diagnosis and women's perspectives  
9 on the impact of endometriosis pain. *Journal of Endometriosis and Pelvic Pain Disorders*  
10 2020:2284026520903214.  
11  
12  
13  
14 42. Gilmour JA, Huntington A, Wilson HV. The impact of endometriosis on work and social  
15 participation. *Int J Nurs Pract* 2008;14:443-8.  
16  
17  
18  
19 43. Murray CB, Groenewald CB, de la Vega R, *et al*. Long-term impact of adolescent chronic  
20 pain on young adult educational, vocational, and social outcomes. *Pain* 2020;161:439-45.  
21  
22  
23  
24 44. Kashikar-Zuck S, Lynch AM, Graham TB, *et al*. Social functioning and peer relationships of  
25 adolescents with juvenile fibromyalgia syndrome. *Arthritis Rheum* 2007;57:474-80.  
26  
27  
28  
29 45. de Graaf R, Tuithof M, van Dorsselaer S, *et al*. Comparing the effects on work performance  
30 of mental and physical disorders. *Soc Psychiatry Psychiatr Epidemiol* 2012;47:1873-83.  
31  
32  
33  
34 46. Smorgick N, Marsh CA, As-Sanie S, *et al*. Prevalence of pain syndromes, mood conditions,  
35 and asthma in adolescents and young women with endometriosis. *J Pediatr Adolesc Gynecol*  
36 2013;26:171-5.  
37  
38  
39  
40 47. Yosef A, Allaire C, Williams C, *et al*. Multifactorial contributors to the severity of chronic  
41 pelvic pain in women. *Am J Obstet Gynecol* 2016;215:760 e1-60 e14.  
42  
43  
44  
45 48. Evans SF, Brooks TA, Esterman AJ, *et al*. The comorbidities of dysmenorrhea: a clinical  
46 survey comparing symptom profile in women with and without endometriosis. *J Pain Res*  
47 2018;11:3181-94.  
48  
49  
50  
51  
52  
53  
54  
55  
56  
57  
58  
59  
60

- 1  
2  
3  
4 49. Fourquet J, Baez L, Figueroa M, *et al*. Quantification of the impact of endometriosis  
5 symptoms on health-related quality of life and work productivity. *Fertil Steril* 2011;96:107-12.  
6  
7  
8  
9 50. Sperschneider ML, Hengartner MP, Kohl-Schwartz A, *et al*. Does endometriosis affect  
10 professional life? A matched case-control study in Switzerland, Germany and Austria. *BMJ*  
11 *open* 2019;9:e019570.  
12  
13  
14  
15 51. Prescott J, Farland LV, Tobias DK, *et al*. A prospective cohort study of endometriosis and  
16 subsequent risk of infertility. *Hum Reprod* 2016;31:1475-82.  
17  
18  
19  
20 52. Geisser ME, Cano A, Leonard MT. Factors associated with marital satisfaction and mood  
21 among spouses of persons with chronic back pain. *J Pain* 2005;6:518-25.  
22  
23  
24  
25 53. Leonard MT, Cano A. Pain affects spouses too: personal experience with pain and  
26 catastrophizing as correlates of spouse distress. *Pain* 2006;126:139-46.  
27  
28  
29  
30 54. Fourquet J, Gao X, Zavala D, *et al*. Patients' report on how endometriosis affects health,  
31 work, and daily life. *Fertil Steril* 2010;93:2424-28.  
32  
33  
34  
35 55. Maleki N, Tahaney K, Thompson BL, *et al*. At the intersection of alcohol use disorder and  
36 chronic pain. *Neuropsychology* 2019;33:795-807.  
37  
38  
39  
40 56. Groenewald CB, Law EF, Fisher E, *et al*. Associations Between Adolescent Chronic Pain  
41 and Prescription Opioid Misuse in Adulthood. *J Pain* 2019;20:28-37.  
42  
43  
44  
45 57. Lazzeri L, Orlandini C, Vannuccini S, *et al*. Endometriosis and perceived stress: impact of  
46 surgical and medical treatment. *Gynecol Obstet Invest* 2015;79:229-33.  
47  
48  
49  
50  
51  
52  
53  
54  
55  
56  
57  
58  
59  
60

**FIGURE LEGENDS**

**Figure 1** Life course impact of endometriosis. Women were asked to indicate how much they agreed with statements involving the impact of endometriosis on (A) educational and professional achievements, (B) social life and relationships, (C) physical well-being, (D) overall life course.

**Figure 2** Experiences and emotions attributed to endometriosis. Respondents were asked to select which experiences related to endometriosis had the most negative impact on their life potential (A). Women were also asked to indicate which general negative experiences (B) and emotions (C) they had undergone because of endometriosis and what kinds of approaches they had taken to manage the impact of endometriosis (D).

FIGURE 1

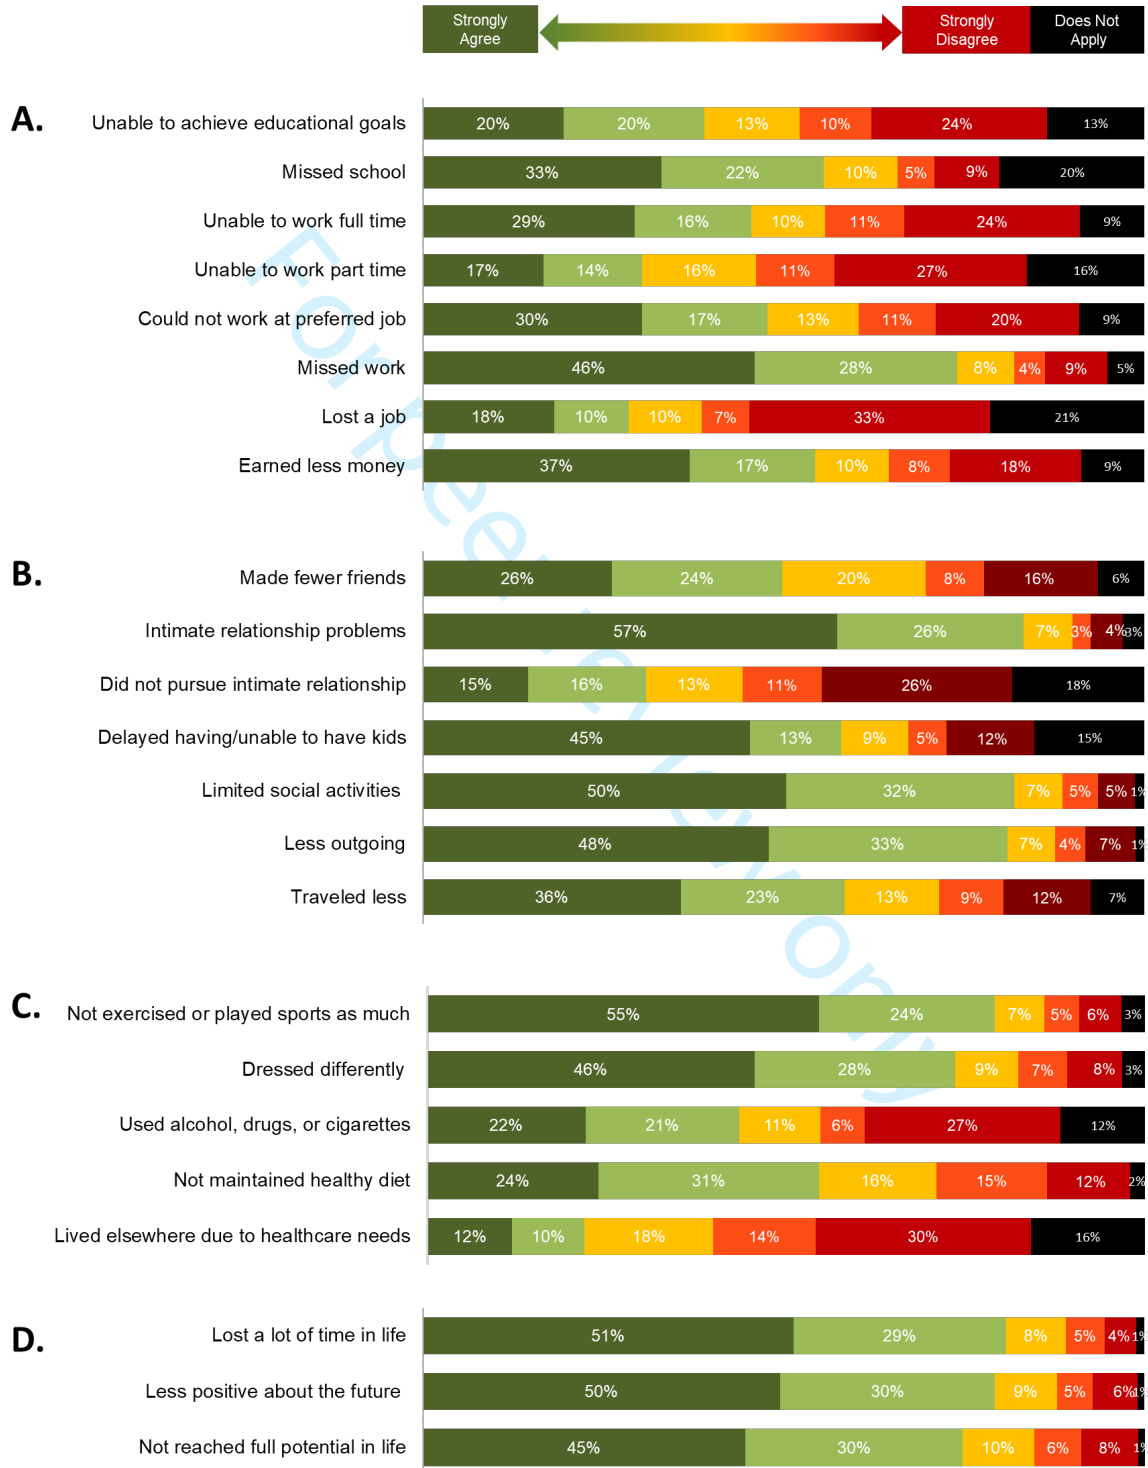

FIGURE 2

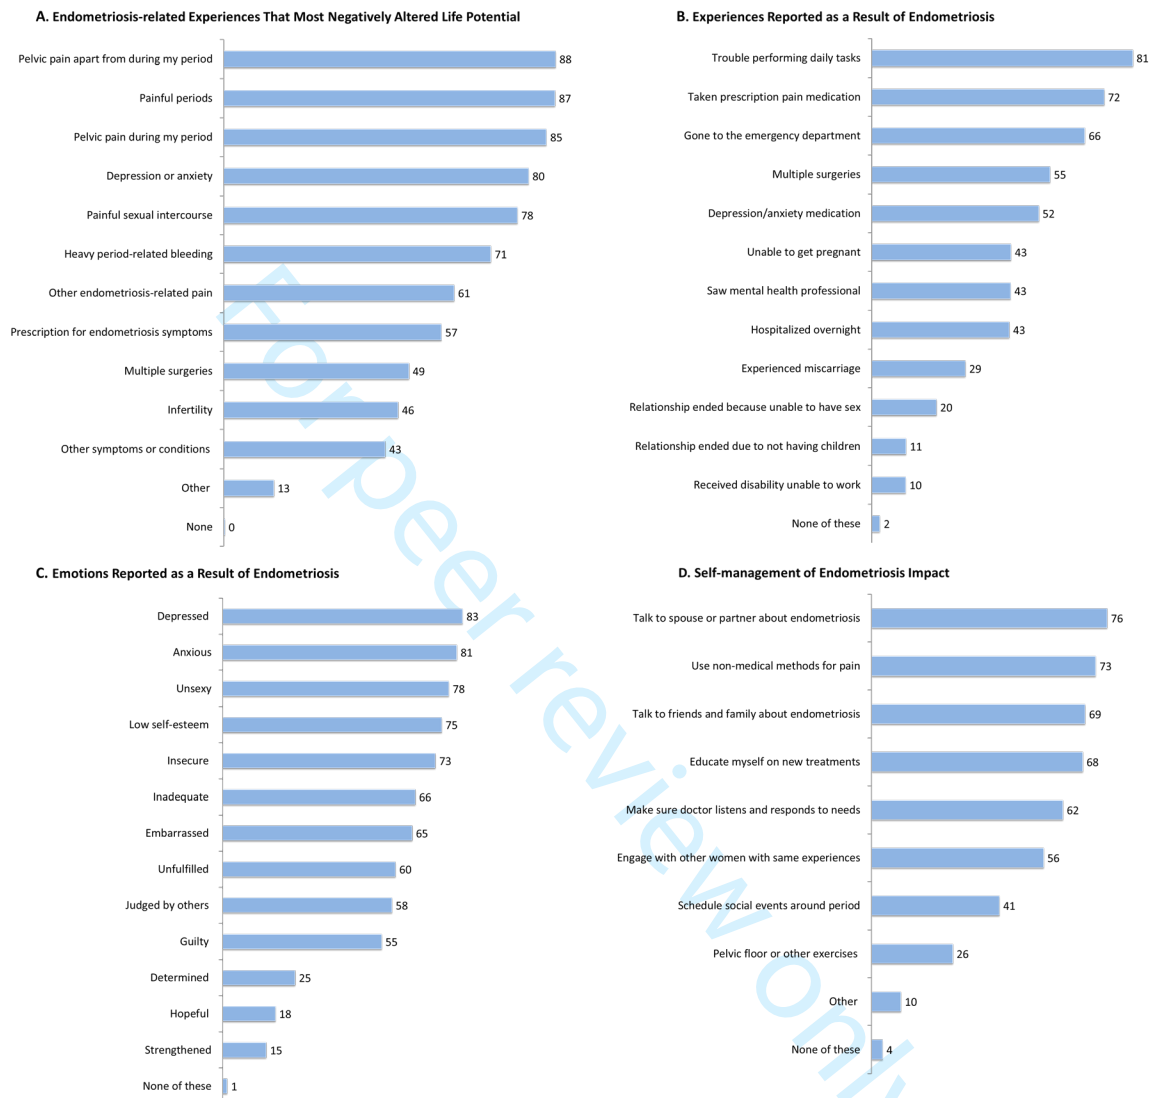

## The impact of endometriosis on women's life decisions and goal attainment

Stacey A Missmer,<sup>1</sup> Frank F Tu,<sup>2</sup> Ahmed M Soliman,<sup>3</sup> Stephanie E Chiuve,<sup>3</sup> Sarah Cross,<sup>3</sup>  
Samantha Eichner,<sup>3</sup> Oscar Antunez Flores,<sup>3</sup> Andrew W Horne,<sup>4</sup> Beth Schneider,<sup>5</sup> Sawsan As-  
Sanie<sup>6</sup>

<sup>1</sup>Department of Epidemiology, Harvard T. H. Chan School of Public Health; and Boston Center for Endometriosis, Boston, Massachusetts, USA, and Department of Obstetrics, Gynecology, and Reproductive Biology, Michigan State University, Grand Rapids, Michigan, USA;

<sup>2</sup>Department of Obstetrics and Gynecology, NorthShore University Health System and Pritzker School of Medicine, University of Chicago, Evanston, Illinois, USA; <sup>3</sup>AbbVie Inc, North Chicago, Illinois, USA; <sup>4</sup>Medical Research Council Centre for Reproductive Health, University of Edinburgh, Edinburgh, UK; <sup>5</sup>MyHealthTeams, San Francisco, California, USA; <sup>6</sup>Department of Obstetrics and Gynecology, University of Michigan, Ann Arbor, Michigan, USA.

## SUPPORTING INFORMATION

**Supporting Information Table 1.** Women indicated how much they agreed or disagreed with the impact of endometriosis on the following: (A) pain, (B) work and education, (C) life experiences altered in a negative way, (D) impact on life, (E) feelings, (F) management of impact.

**Survey.** MyEndometriosisTeam Survey – Life Course Impact Survey

## Supporting Information Table 1.

| <b>S1A</b>                                               | <b>Daily</b> | <b>A few times<br/>a week</b> | <b>A few times<br/>a month</b> | <b>Weekly</b> | <b>Monthly</b> | <b>Every few<br/>months</b> | <b>Never</b> | <b>Once or<br/>twice a<br/>year</b> |
|----------------------------------------------------------|--------------|-------------------------------|--------------------------------|---------------|----------------|-----------------------------|--------------|-------------------------------------|
| <b>Total, n (%)<br/>(N = 743)</b>                        | 415 (55.9)   | 160 (21.5)                    | 78 (10.5)                      | 43 (5.8)      | 31 (4.2)       | 9 (1.2)                     | 4 (0.5)      | 3 (0.4)                             |
| <b>Less positive about future, n (%)<br/>(n = 589)</b>   | 362 (61.5)   | 120 (20.4)                    | 50 (8.5)                       | 31 (5.3)      | 16 (2.7)       | 6 (1.0)                     | 2 (0.3)      | 2 (0.3)                             |
| <b>Remaining respondents<br/>(n = 154)</b>               | 53 (34.4)    | 40 (26.0)                     | 28 (18.2)                      | 12 (7.8)      | 15 (9.7)       | 3 (1.9)                     | 2 (1.3)      | 1 (0.6)                             |
| <b>Did not reach full potential, n (%)<br/>(n = 556)</b> | 341 (61.3)   | 121 (21.8)                    | 44 (7.9)                       | 28 (5.0)      | 13 (2.3)       | 6 (1.1)                     | 2 (0.4)      | 1 (0.2)                             |
| <b>Remaining respondents<br/>(n = 187)</b>               | 74 (39.6)    | 39 (20.9)                     | 15 (8.0)                       | 34 (18.2)     | 18 (9.6)       | 3 (1.6)                     | 2 (1.1)      | 2 (1.1)                             |

  

| <b>S1B</b>                                               | <b>Missed days of<br/>work</b> | <b>Missed school</b> | <b>Earned less<br/>money</b> | <b>Could not<br/>work at<br/>preferred job</b> | <b>Unable to<br/>work full time</b> | <b>Unable to<br/>achieve<br/>educational<br/>goals</b> | <b>Unable to<br/>work part time</b> | <b>Lost a job</b> |
|----------------------------------------------------------|--------------------------------|----------------------|------------------------------|------------------------------------------------|-------------------------------------|--------------------------------------------------------|-------------------------------------|-------------------|
| <b>Total, n (%)<br/>(N = 743)</b>                        | 550 (74.9)                     | 413 (56.3)           | 404 (55.0)                   | 355 (48.4)                                     | 338 (46.0)                          | 290 (39.5)                                             | 226 (30.8)                          | 212 (28.9)        |
| <b>Less positive about future, n (%)<br/>(n = 589)</b>   | 463 (78.6)                     | 343 (58.2)           | 359 (61.0)                   | 316 (53.7)                                     | 300 (50.9)                          | 257 (43.6)                                             | 202 (34.3)                          | 190 (32.3)        |
| <b>Remaining respondents<br/>(n = 154)</b>               | 87 (56.5)                      | 70 (45.5)            | 45 (29.2)                    | 39 (25.3)                                      | 38 (24.7)                           | 33 (21.4)                                              | 24 (15.6)                           | 22 (14.3)         |
| <b>Did not reach full potential, n (%)<br/>(n = 556)</b> | 448 (80.6)                     | 329 (59.2)           | 365 (65.6)                   | 323 (58.1)                                     | 295 (53.1)                          | 261 (46.9)                                             | 205 (36.9)                          | 193 (34.7)        |
| <b>Remaining respondents<br/>(n = 187)</b>               | 102 (54.5)                     | 84 (44.9)            | 39 (20.9)                    | 32 (17.1)                                      | 43 (23.0)                           | 29 (15.5)                                              | 21 (11.2)                           | 19 (10.2)         |



Missmer SA, *et al*

**S1C**

|                                                          | Pelvic pain<br>apart from<br>period | Painful<br>periods | Pelvic pain<br>during period | Depression or<br>anxiety | Painful sexual<br>intercourse | Heavy period-<br>related<br>bleeding | Other<br>endometriosi<br>s-related pain | Taken<br>prescription<br>for symptoms | Multiple<br>surgeries | Infertility | Other<br>symptoms or<br>conditions |
|----------------------------------------------------------|-------------------------------------|--------------------|------------------------------|--------------------------|-------------------------------|--------------------------------------|-----------------------------------------|---------------------------------------|-----------------------|-------------|------------------------------------|
| <b>Total, n (%)<br/>(N = 743)</b>                        | 651 (87.6)                          | 650 (87.5)         | 633 (85.2)                   | 598 (80.5)               | 576 (77.5)                    | 524 (70.5)                           | 452 (60.8)                              | 427 (57.5)                            | 363 (48.9)            | 342 (46.0)  | 317 (42.7)                         |
| <b>Less positive about future, n (%)<br/>(n = 589)</b>   | 528 (89.6)                          | 517 (87.8)         | 506 (85.9)                   | 505 (85.7)               | 461 (78.3)                    | 413 (70.1)                           | 382 (64.9)                              | 353 (59.9)                            | 297 (50.4)            | 272 (46.2)  | 268 (45.5)                         |
| <b>Remaining respondents<br/>(n = 154)</b>               | 123 (79.9)                          | 133 (86.4)         | 127 (82.5)                   | 93 (60.4)                | 115 (74.7)                    | 111 (72.1)                           | 70 (45.5)                               | 74 (48.1)                             | 66 (42.9)             | 70 (45.5)   | 49 (31.8)                          |
| <b>Did not reach full potential, n (%)<br/>(n = 556)</b> | 500 (89.9)                          | 491 (88.3)         | 482 (86.7)                   | 476 (85.6)               | 430 (77.3)                    | 400 (71.9)                           | 366 (65.8)                              | 332 (59.7)                            | 284 (51.1)            | 261 (46.9)  | 259 (46.6)                         |
| <b>Remaining respondents<br/>(n = 187)</b>               | 151 (80.7)                          | 159 (85.0)         | 151 (80.7)                   | 122 (65.2)               | 146 (78.1)                    | 124 (66.3)                           | 86 (46.0)                               | 95 (50.8)                             | 79 (42.2)             | 81 (43.3)   | 58 (31.0)                          |

**S1D**

|                                                          | Trouble<br>performing<br>daily tasks | Taken Rx<br>pain<br>medication | Gone to ER | Multiple<br>surgeries | Depression/<br>anxiety<br>medication | Unable to<br>get<br>pregnant | Saw mental<br>health<br>professional | Hospitalized<br>overnight | Experienced<br>miscarriage | Relationship<br>ended<br>because<br>unable to<br>have sex |
|----------------------------------------------------------|--------------------------------------|--------------------------------|------------|-----------------------|--------------------------------------|------------------------------|--------------------------------------|---------------------------|----------------------------|-----------------------------------------------------------|
| <b>Total, n (%)<br/>(N = 743)</b>                        | 594 (80.9)                           | 529 (72.1)                     | 485 (66.1) | 406 (55.3)            | 380 (51.8)                           | 317 (43.2)                   | 316 (43.1)                           | 313 (42.6)                | 213 (29.0)                 | 147 (20.0)                                                |
| <b>Less positive about future, n (%)<br/>(n = 589)</b>   | 500 (84.9)                           | 442 (75.0)                     | 406 (68.9) | 333 (56.5)            | 327 (55.5)                           | 251 (42.6)                   | 276 (46.9)                           | 266 (45.2)                | 167 (28.4)                 | 132 (22.4)                                                |
| <b>Remaining respondents<br/>(n = 154)</b>               | 94 (61.0)                            | 87 (56.5)                      | 79 (51.3)  | 73 (47.4)             | 53 (34.4)                            | 66 (42.9)                    | 40 (26.0)                            | 47 (30.5)                 | 46 (29.9)                  | 15 (9.7)                                                  |
| <b>Did not reach full potential, n (%)<br/>(n = 556)</b> | 478 (86.0)                           | 421 (75.7)                     | 390 (70.1) | 311 (55.9)            | 308 (55.4)                           | 239 (43.0)                   | 265 (47.7)                           | 249 (44.8)                | 166 (29.9)                 | 132 (23.7)                                                |
| <b>Remaining respondents<br/>(n = 187)</b>               | 116 (62.0)                           | 108 (57.8)                     | 95 (50.8)  | 95 (50.8)             | 72 (38.5)                            | 78 (41.7)                    | 51 (27.3)                            | 64 (34.2)                 | 47 (25.1)                  | 15 (8.0)                                                  |

| <b>S1E</b>                                              |  | <b>Depressed</b> | <b>Anxious</b> | <b>Unsexy</b> | <b>Low self-esteem</b> | <b>Insecure</b> | <b>Inadequate</b> | <b>Embarrassed</b> | <b>Unfulfilled</b> | <b>Judged by others</b> | <b>Guilty</b> |
|---------------------------------------------------------|--|------------------|----------------|---------------|------------------------|-----------------|-------------------|--------------------|--------------------|-------------------------|---------------|
| <b>Total, n (%)</b><br>(N = 743)                        |  | 607 (82.7)       | 592 (80.7)     | 572 (77.9)    | 554 (75.5)             | 538 (73.3)      | 487 (66.3)        | 479 (65.3)         | 437 (59.5)         | 428 (58.3)              | 402 (54.8)    |
| <b>Less positive about future, n (%)</b><br>(n = 589)   |  | 517 (87.8)       | 491 (83.4)     | 468 (79.5)    | 478 (81.2)             | 469 (79.6)      | 421 (71.5)        | 415 (70.5)         | 387 (65.7)         | 380 (64.5)              | 350 (59.4)    |
| <b>Remaining respondents</b><br>(n = 154)               |  | 90 (58.4)        | 101 (65.6)     | 104 (67.5)    | 76 (49.4)              | 69 (44.8)       | 66 (42.9)         | 64 (41.6)          | 50 (32.5)          | 48 (31.2)               | 52 (33.8)     |
| <b>Did not reach full potential, n (%)</b><br>(n = 556) |  | 487 (87.6)       | 462 (83.1)     | 441 (79.3)    | 443 (79.7)             | 434 (78.1)      | 401 (72.1)        | 393 (70.7)         | 375 (67.4)         | 352 (63.3)              | 330 (59.4)    |
| <b>Remaining respondents</b><br>(n = 187)               |  | 120 (64.2)       | 130 (69.5)     | 131 (70.1)    | 111 (59.4)             | 104 (55.6)      | 86 (46.0)         | 86 (46.0)          | 62 (33.2)          | 76 (40.6)               | 72 (38.5)     |

  

| <b>S1F</b>                                              |  | <b>Talk to spouse or partner</b> | <b>Use non-medical methods for pain</b> | <b>Talk to friends and family</b> | <b>Educate self on treatments</b> | <b>Make doctor listen and respond to needs</b> | <b>Engage with other women with same experiences</b> | <b>Schedule social events around period</b> | <b>Pelvic floor or other exercises</b> | <b>Other</b> | <b>None of these</b> |
|---------------------------------------------------------|--|----------------------------------|-----------------------------------------|-----------------------------------|-----------------------------------|------------------------------------------------|------------------------------------------------------|---------------------------------------------|----------------------------------------|--------------|----------------------|
| <b>Total, n (%)</b><br>(N = 743)                        |  | 560 (76.3)                       | 533 (72.6)                              | 508 (69.2)                        | 502 (68.4)                        | 455 (62.0)                                     | 409 (55.7)                                           | 304 (41.4)                                  | 193 (26.3)                             | 70 (9.5)     | 26 (3.5)             |
| <b>Less positive about future, n (%)</b><br>(n = 589)   |  | 445 (75.6)                       | 425 (72.2)                              | 409 (69.4)                        | 409 (69.4)                        | 369 (62.6)                                     | 337 (57.2)                                           | 257 (43.6)                                  | 162 (27.5)                             | 61 (10.4)    | 19 (3.2)             |
| <b>Remaining respondents</b><br>(n = 154)               |  | 115 (74.7)                       | 108 (70.1)                              | 99 (64.3)                         | 93 (60.4)                         | 86 (55.8)                                      | 72 (46.8)                                            | 47 (30.5)                                   | 31 (20.1)                              | 9 (5.8)      | 7 (4.5)              |
| <b>Did not reach full potential, n (%)</b><br>(n = 556) |  | 418 (75.2)                       | 405 (72.8)                              | 383 (68.9)                        | 394 (70.9)                        | 345 (62.1)                                     | 325 (58.5)                                           | 246 (44.2)                                  | 153 (27.5)                             | 59 (10.6)    | 20 (3.6)             |
| <b>Remaining respondents</b><br>(n = 187)               |  | 142 (75.9)                       | 128 (68.4)                              | 125 (66.8)                        | 108 (57.8)                        | 110 (58.8)                                     | 84 (44.9)                                            | 58 (31.0)                                   | 40 (21.4)                              | 11 (5.9)     | 6 (3.2)              |

## Survey.

### MyEndometriosisTeam Survey – Life Course Impact Survey

#### Introduction

Part of our mission at MyEndometriosisTeam is to help build awareness and understanding of the impact that endometriosis can have on daily life. Creating a better understanding of what other women with endometriosis go through is important to many members. The aim of this study is to understand real-life experiences of women living with chronic endometriosis. This includes how it may influence life choices and any long-lasting effect it has.

This survey should take approximately 8 minutes to complete. Your participation is completely voluntary, and your responses are anonymous. MyEndometriosisTeam never shares any personally identifying information. Highlights of the findings of this research survey will be shared back with the MyEndometriosisTeam community. We are conducting this survey in collaboration with one of our pharmaceutical partners. This is one of the ways we keep MyEndometriosisTeam free while making sure your voice is heard. If you have any questions regarding the survey, please contact [support@myendometriosisteam.com](mailto:support@myendometriosisteam.com).

If you are 19 years of age or older, live in the United States (excluding Puerto Rico), understand the statements above and freely consent to participate in this research, click on the “Yes, I agree” button to begin the survey.

Yes, I agree

No thanks, I'd rather not participate

#### Section 1: Screening Questions

S1. Which of the following describes you?

Male (**Terminate**)

Female

1  
2  
3 S2. What is your age?  
4

5 Under 19 (**Terminate**)  
6

7 19-29  
8

9 30-39  
10

11 40-49  
12

13 50-59  
14

15 60 or older  
16  
17

18  
19 S3. Which one of the following best describes your condition?  
20

21 Stage 1 endometriosis  
22

23 Stage 2 endometriosis  
24

25 Stage 3 endometriosis  
26

27 Stage 4 endometriosis  
28

29 Not sure what stage of endometriosis I have  
30

31 I do not have endometriosis (**Terminate**)  
32  
33

34  
35 S4. In which country do you currently live?  
36

37 United States (excluding Puerto Rico) (**Continue**)  
38

39 Australia  
40

41 Canada  
42

43 Ireland  
44

45 Netherlands  
46

47 New Zealand  
48

49 South Africa  
50

51 United Kingdom  
52

53 Other  
54  
55

56 Section 1: Endometriosis Severity  
57  
58

1. At what age did your endometriosis symptoms begin? (drop down menu)
2. At approximately what age did you start your first period? (drop down menu)
3. Thinking about when you first started to experience endometriosis symptoms, approximately how many years did it take before you were diagnosed with endometriosis? (drop down menu)
4. Did you ever have a surgical procedure such as a laparoscopy or laparotomy to confirm you have endometriosis?
  - Yes
  - No
  - Not sure
5. Which one of the following best describes how often you typically feel some type of endometriosis-related pain?
  - Daily
  - A few times a week
  - Weekly
  - A few times a month
  - Monthly
  - Every few months
  - Once or twice a year
  - Never
6. Please rate how severe your endometriosis related pain has been at its worst in the last 12 months using a scale from 0 to 10 where 0=no pain and 10=worst imaginable pain. (Drop down menu).

7. Over the years, has your endometriosis related pain gotten better, gotten worse or stayed the same?

Gotten much better

Gotten somewhat better

Stayed the same

Gotten somewhat worse

Gotten much worse

## Section 2: Impact on Quality of Life and Life Choices

8. Please indicate how much you agree or disagree with the following statements about the impact endometriosis has had **on your entire life up to now.**

(Rotate order)

### **Because of my endometriosis:**

| (Please select one box for each row)               | Strongly disagree | Some-what Disagr | Neutral | Some-what Agree | Strongly agree | Not Applic-able |
|----------------------------------------------------|-------------------|------------------|---------|-----------------|----------------|-----------------|
| I was unable to achieve my educational goals       | 1                 | 2                | 3       | 4               | 5              | 6               |
| I missed many days of school                       | 1                 | 2                | 3       | 4               | 5              | 6               |
| I was unable to work full time                     | 1                 | 2                | 3       | 4               | 5              | 6               |
| I was unable to work part time                     | 1                 | 2                | 3       | 4               | 5              | 6               |
| I could not work at the job I would have preferred | 1                 | 2                | 3       | 4               | 5              | 6               |
| I missed many days of work                         | 1                 | 2                | 3       | 4               | 5              | 6               |
| I lost a job                                       | 1                 | 2                | 3       | 4               | 5              | 6               |

|                                                                     |   |   |   |   |   |   |
|---------------------------------------------------------------------|---|---|---|---|---|---|
| I earned less money than I could have                               | 1 | 2 | 3 | 4 | 5 | 6 |
| I made fewer friends                                                | 1 | 2 | 3 | 4 | 5 | 6 |
| I have had problems with sexual or intimate relationships           | 1 | 2 | 3 | 4 | 5 | 6 |
| I have not dated or pursued an intimate relationship                | 1 | 2 | 3 | 4 | 5 | 6 |
| I have delayed having or have been unable to have children          | 1 | 2 | 3 | 4 | 5 | 6 |
| I have limited my social activities                                 | 1 | 2 | 3 | 4 | 5 | 6 |
| I have not exercised or played sports as much as I would have liked | 1 | 2 | 3 | 4 | 5 | 6 |
| I do not live where I would like due to my healthcare needs         | 1 | 2 | 3 | 4 | 5 | 6 |
| I lost a lot of time in my life                                     | 1 | 2 | 3 | 4 | 5 | 6 |
| I have travelled less than I would have liked                       | 1 | 2 | 3 | 4 | 5 | 6 |
| I have dressed differently than I would have liked                  | 1 | 2 | 3 | 4 | 5 | 6 |
| I have used alcohol, drugs or smoked cigarettes                     | 1 | 2 | 3 | 4 | 5 | 6 |
| I have not maintained a healthy diet                                | 1 | 2 | 3 | 4 | 5 | 6 |
| I have been less outgoing                                           | 1 | 2 | 3 | 4 | 5 | 6 |
| I have been less positive about the future                          | 1 | 2 | 3 | 4 | 5 | 6 |
| I have not reached my full potential in life                        | 1 | 2 | 3 | 4 | 5 | 6 |

- 1  
2  
3 9. What endometriosis-related experiences, if any, do you think have most contributed to  
4 altering your life potential in a negative way? Select all that apply. (Rotate order)  
5  
6

7 Painful sexual intercourse

8 Pelvic pain during my period

9 Pelvic pain apart from during my period

10 Painful periods

11 Heavy period-related bleeding

12 Other endometriosis related pain

13 Infertility

14 Depression or anxiety

15 Multiple surgeries

16 Prescription treatment to control endometriosis symptoms

17 Other symptoms or conditions (please specify)

18 Other (please specify)

19 None  
20  
21  
22  
23  
24  
25  
26  
27  
28  
29  
30  
31  
32  
33  
34  
35  
36  
37  
38  
39  
40  
41  
42  
43  
44  
45  
46  
47  
48  
49  
50  
51  
52  
53  
54  
55  
56  
57  
58  
59  
60



- 1  
2  
3 10. Which, if any of these, have you experienced as a result of your endometriosis? Check  
4 all that apply. (Rotate order)  
5  
6

7 Taken prescription medication for the pain (for example, opioids)

8 Taken prescription medication to treat depression or anxiety

9 Had multiple surgical procedures

10 Been hospitalized overnight

11 Gone to the emergency room

12 Received disability income due to being unable to work

13 Had a miscarriage (whether or not it was due to having endometriosis)

14 Had trouble performing daily tasks

15 Saw a mental health professional (e. g., psychiatrist, counselor)

16 Was unable to get pregnant

17 Had a relationship end because I was unable to have children

18 Had a relationship end because I was unable to have sex

19 None of these  
20  
21  
22  
23  
24  
25  
26  
27  
28  
29  
30  
31  
32  
33  
34  
35  
36  
37  
38  
39  
40  
41  
42  
43  
44  
45  
46  
47  
48  
49  
50  
51  
52  
53  
54  
55  
56  
57  
58  
59  
60

- 1  
2  
3 11. And which, if any of these emotions, have you experienced as a result of your  
4 endometriosis? Check all that apply. (Rotate order)  
5  
6

7 **I have felt...**  
8

9 Low self esteem  
10

11 Judged by others  
12

13 Inadequate  
14

15 Unsexy  
16

17 Insecure  
18

19 Guilty  
20

21 Determined  
22

23 Strengthened  
24

25 Hopeful  
26

27 Embarrassed  
28

29 Unfulfilled  
30

31 Depressed  
32

33 Anxious  
34

35 None of these  
36  
37  
38  
39  
40  
41  
42  
43  
44  
45  
46  
47  
48  
49  
50  
51  
52  
53  
54  
55  
56  
57  
58  
59  
60

- 1  
2  
3 12. Which of the following, if any, have you done to help manage the impact of endometriosis?  
4 Select all that apply. (rotate order)  
5

6  
7 Schedule social events around my period

8  
9 Engage with other women going through the same experiences

10  
11 Talk to my friends and family about endometriosis

12  
13 Talk to my spouse or partner about my endometriosis

14  
15 Pelvic floor or other exercises to lessen pain during sex

16  
17 Make sure my doctor listens and responds to my needs

18  
19 Educate myself on new treatments

20  
21 Use non-medical methods for controlling pain (e.g., ice or heat, lubricants during sex)

22  
23 Other (please describe)

24  
25 None of these

- 26  
27 13. Because of endometriosis, is there anything you feel you were unable to accomplish in  
28 your life? (open end)

- 29  
30 14. Is there anything else you would like us to know about the impact endometriosis has had  
31 on your life? (open end)  
32

33 Just a few last questions.  
34  
35  
36

- 37 D1. Which of the following best describes the area where you live?  
38  
39  
40

41 Urban

42 Suburban

43 Rural

44 Not sure / prefer not to say  
45  
46  
47  
48  
49  
50  
51  
52  
53  
54  
55  
56  
57  
58  
59  
60

1  
2  
3 D2. What is the highest level of education you have achieved?  
4  
5  
6

7 Less than high school

8 Some high school

9 High school or equivalent (e. g., GED)

10 Some college, but no degree

11 Associate degree

12 College degree (e.g., B.A., B.S.)

13 Some graduate school, but no degree

14 Graduate school (e.g., M.S. M.D., Ph.D.)

15 Prefer not to answer  
16  
17  
18  
19  
20  
21  
22  
23  
24

25 D3. What is your current employment status?  
26  
27

28 Working full time

29 Working part time

30 Unemployed, not looking for work

31 Unemployed, looking for work

32 Retired

33 Unable to work

34 Prefer not to answer  
35  
36  
37  
38  
39  
40  
41  
42  
43  
44  
45  
46  
47  
48  
49  
50  
51  
52  
53  
54  
55  
56  
57  
58  
59  
60

1  
2  
3 D4. Which of the following best describes your marital status?  
4  
5

6  
7 Single/never married

8 Married

9 Widowed

10 Divorced or separated

11 Prefer not to answer

12  
13  
14  
15  
16  
17  
18 (Skip D5 if “married” or “prefer not to answer” selected in D4)  
19  
20  
21

22 D5. Are you currently in an intimate relationship?  
23  
24  
25

26 Yes

27 No

28 Prefer not to answer  
29  
30  
31  
32

33 D6. How many children, if any, do you have?  
34  
35  
36  
37

38 None

39 1

40 2

41 3

42 4

43 5 or more

44 Prefer not to answer  
45  
46  
47  
48  
49  
50  
51

52 Thank you for answering these questions.  
53  
54  
55  
56  
57  
58  
59  
60

# BMJ Open

## The impact of endometriosis on women's life decisions and goal attainment measured in a cross-sectional survey of members of an online patient community

|                                 |                                                                                                                                                                                                                                                                                                                                                                                                                                                                                                                                                                                                  |
|---------------------------------|--------------------------------------------------------------------------------------------------------------------------------------------------------------------------------------------------------------------------------------------------------------------------------------------------------------------------------------------------------------------------------------------------------------------------------------------------------------------------------------------------------------------------------------------------------------------------------------------------|
| Journal:                        | <i>BMJ Open</i>                                                                                                                                                                                                                                                                                                                                                                                                                                                                                                                                                                                  |
| Manuscript ID                   | bmjopen-2021-052765.R1                                                                                                                                                                                                                                                                                                                                                                                                                                                                                                                                                                           |
| Article Type:                   | Original research                                                                                                                                                                                                                                                                                                                                                                                                                                                                                                                                                                                |
| Date Submitted by the Author:   | 30-Sep-2021                                                                                                                                                                                                                                                                                                                                                                                                                                                                                                                                                                                      |
| Complete List of Authors:       | Missmer, Stacey A.; Michigan State University College of Human Medicine; Harvard University T H Chan School of Public Health<br>Tu, Frank; NorthShore University HealthSystem; University of Chicago Pritzker School of Medicine<br>Soliman, Ahmed M.; AbbVie Inc<br>Chiuve, Stephanie; AbbVie Inc<br>Cross, Sarah; AbbVie Inc<br>Eichner, Samantha; AbbVie Inc<br>Antunez Flores, Oscar; AbbVie Inc<br>Horne, Andrew; The University of Edinburgh MRC Centre for Reproductive Health,<br>Schneider, Beth; MyHealthTeams<br>As-Sanie, Sawsan; University of Michigan, Obstetrics and Gynaecology |
| <b>Primary Subject Heading</b>: | Obstetrics and gynaecology                                                                                                                                                                                                                                                                                                                                                                                                                                                                                                                                                                       |
| Secondary Subject Heading:      | Obstetrics and gynaecology, Qualitative research                                                                                                                                                                                                                                                                                                                                                                                                                                                                                                                                                 |
| Keywords:                       | GYNAECOLOGY, Community gynaecology < GYNAECOLOGY, QUALITATIVE RESEARCH                                                                                                                                                                                                                                                                                                                                                                                                                                                                                                                           |
|                                 |                                                                                                                                                                                                                                                                                                                                                                                                                                                                                                                                                                                                  |

SCHOLARONE™  
Manuscripts



I, the Submitting Author has the right to grant and does grant on behalf of all authors of the Work (as defined in the below author licence), an exclusive licence and/or a non-exclusive licence for contributions from authors who are: i) UK Crown employees; ii) where BMJ has agreed a CC-BY licence shall apply, and/or iii) in accordance with the terms applicable for US Federal Government officers or employees acting as part of their official duties; on a worldwide, perpetual, irrevocable, royalty-free basis to BMJ Publishing Group Ltd ("BMJ") its licensees and where the relevant Journal is co-owned by BMJ to the co-owners of the Journal, to publish the Work in this journal and any other BMJ products and to exploit all rights, as set out in our [licence](#).

The Submitting Author accepts and understands that any supply made under these terms is made by BMJ to the Submitting Author unless you are acting as an employee on behalf of your employer or a postgraduate student of an affiliated institution which is paying any applicable article publishing charge ("APC") for Open Access articles. Where the Submitting Author wishes to make the Work available on an Open Access basis (and intends to pay the relevant APC), the terms of reuse of such Open Access shall be governed by a Creative Commons licence – details of these licences and which [Creative Commons](#) licence will apply to this Work are set out in our licence referred to above.

Other than as permitted in any relevant BMJ Author's Self Archiving Policies, I confirm this Work has not been accepted for publication elsewhere, is not being considered for publication elsewhere and does not duplicate material already published. I confirm all authors consent to publication of this Work and authorise the granting of this licence.

1  
2  
3 1 **The impact of endometriosis on women's life decisions and goal attainment measured in**  
4  
5 2 **a cross-sectional survey of members of an online patient community**  
6  
7

8  
9 3 Stacey A Missmer,<sup>1</sup> Frank F Tu,<sup>2</sup> Ahmed M Soliman,<sup>3</sup> Stephanie E Chiuve,<sup>3</sup> Sarah Cross,<sup>3</sup>  
10  
11 4 Samantha Eichner,<sup>3</sup> Oscar Antunez Flores,<sup>3</sup> Andrew W Horne,<sup>4</sup> Beth Schneider,<sup>5</sup> Sawsan As-  
12  
13 5 Sanie<sup>6</sup>  
14  
15

16  
17  
18 6 <sup>1</sup>Department of Epidemiology, Harvard T. H. Chan School of Public Health; and Boston Center  
19  
20 7 for Endometriosis, Boston, Massachusetts, USA, and Department of Obstetrics, Gynecology,  
21  
22 8 and Reproductive Biology, Michigan State University, Grand Rapids, Michigan, USA;

23  
24 9 <sup>2</sup>Department of Obstetrics and Gynecology, NorthShore University Health System and Pritzker  
25  
26 10 School of Medicine, University of Chicago, Evanston, Illinois, USA; <sup>3</sup>AbbVie Inc, North Chicago,  
27  
28 11 Illinois, USA; <sup>4</sup>Medical Research Council Centre for Reproductive Health, University of  
29  
30 12 Edinburgh, Edinburgh, UK; <sup>5</sup>MyHealthTeams, San Francisco, California, USA; <sup>6</sup>Department of  
31  
32 13 Obstetrics and Gynecology, University of Michigan, Ann Arbor, Michigan, USA.  
33  
34

35  
36 14 **Word Count:** 3893 words  
37  
38

39  
40  
41 15 **Key Words:** Qualitative Research; Gynaecology; Community Gynaecology  
42  
43  
44

45 16  
46  
47  
48

49 17  
50

51 18  
52

53 19  
54

55 20  
56  
57  
58  
59  
60



1  
2  
3 1  
4  
5 2  
6  
7 3  
8  
9 4  
10  
11 5  
12  
13 6  
14  
15 7  
16  
17 8  
18  
19 9  
20  
21  
22  
23  
24  
25  
26  
27  
28  
29  
30  
31  
32  
33  
34  
35  
36  
37  
38  
39  
40  
41  
42  
43  
44  
45  
46  
47  
48  
49  
50  
51  
52  
53  
54  
55  
56  
57  
58  
59  
60

**Correspondence to**

Dr Stacey A Missmer

Professor of Obstetrics, Gynecology, and Reproductive Biology

Michigan State University College of Human Medicine

15 Michigan Street NE

Grand Rapids, MI 49503

Phone: 616-234-2705

Email: [stacey.missmer@channing.harvard.edu](mailto:stacey.missmer@channing.harvard.edu)

## 1 ABSTRACT

2  
3  
4  
5  
6  
7  
8 **Objectives:** To examine women's perceptions of endometriosis-associated disease burden and  
9  
10 its impact on life decisions and goal attainment.

11  
12  
13  
14  
15 **Design:** An anonymous online survey was distributed in October 2018 through the social media  
16  
17 network MyEndometriosisTeam.com.

18  
19  
20  
21  
22 **Participants:** Women aged 19 years and older living in several English-speaking countries who  
23  
24 self-identified as having endometriosis.

25  
26  
27  
28  
29  
30  
31  
32 **Outcome measures:** Patients' perspectives on how endometriosis has affected their work,  
33  
34 education, relationships, overall life decisions, and attainment of goals. Subanalyses were  
35  
36 performed for women who identified as "less positive about the future" (LPAF) or had "not  
37  
38 reached their full potential" (NRFP) due to endometriosis.

39  
40  
41  
42  
43  
44  
45  
46  
47  
48  
49  
50  
51  
52  
53  
54  
55  
56  
57  
58  
59  
60  
**Results:** 743 women completed the survey. Women reported high levels of pain when pain was  
at its worst (mean score, 8.9 on severity scale of 0 [no pain] to 10 [worst imaginable pain]) and  
most (56%, n=415) experienced pain daily. Women reported other negative experiences  
attributed to endometriosis, including emergency department visits (66%, n=485), multiple  
surgeries (55%, n=406), and prescription treatments for symptoms of endometriosis (72%,  
n=529). Women indicated that they believed endometriosis had a negative impact on their  
educational and professional achievements, social lives/relationships, and overall physical  
health. Most women "somewhat agreed"/"strongly agreed" that endometriosis caused them to  
lose time in life (81%, n=601), feel LPAF (80%, n=589), and feel they had NRFP (75%, n=556).  
Women who identified as LPAF or NRFP generally reported more negative experiences than  
those who were non-LPAF or non-NRFP.

1  
2  
3 1 **Conclusions:** Pain and negative experiences related to endometriosis were perceived to  
4  
5 2 negatively impact major life-course decisions and attainment of goals. Greater practitioner  
6  
7 3 awareness of the impact that endometriosis has on a woman's life course and the importance of  
8  
9 4 meaningful dialogue with patients may be important for improving long-term management of the  
10  
11 5 disease and help identify women who are most vulnerable.  
12  
13

14  
15 6 **Abstract Word Count:** 291 (300 word maximum)  
16  
17

18  
19 7 **Strengths and limitations of this study**  
20  
21

- 22 8 • Strength: Quantitative survey with a meaningful sample size and sample population that  
23  
24 9 spanned multiple countries  
25  
26 10 • Strength: Targeted research questions developed based on existing conversations on a  
27  
28 11 social network platform  
29  
30 12 • Strength: Use of social network familiar to patients, facilitating honesty in responses to  
31  
32 13 sensitive topics  
33  
34 14 • Limitation: Possible self-selection bias due to voluntary participation in an online  
35  
36 15 community and no targeted sampling; quantitative data may not be generalizable to all  
37  
38 16 women with endometriosis  
39  
40 17 • Limitation: Self-reported patient responses that were not confirmed by medical records  
41  
42 18 or other complementary data  
43  
44  
45  
46  
47  
48  
49  
50  
51  
52  
53  
54  
55  
56  
57  
58  
59  
60

## 1 BACKGROUND

2 Endometriosis is an often chronic gynecologic disorder that impacts 10% of women of  
3 reproductive age.<sup>1</sup> Endometrial-like tissue thriving outside the uterus leads to local and systemic  
4 inflammation that can result in a wide range of life-impacting effects, including pelvic pain,  
5 dysmenorrhea, dyspareunia, and infertility.<sup>2-4</sup> These debilitating effects have an immense impact  
6 on a patient's quality of life and overall well-being.<sup>5,6</sup> For example, symptoms of endometriosis  
7 may have a negative impact on women's psychological health,<sup>7,8</sup> strain social and intimate  
8 relationships,<sup>5,9-11</sup> and lead to losses in productivity, both at home and in the workplace.<sup>12</sup> These  
9 issues have been further exacerbated by the COVID-19 pandemic, which has led to reduced  
10 access to medical care, delayed treatments, increased stress, loss of work productivity, and  
11 mandated self-isolation.<sup>13,14</sup>

12 Outside the physical and emotional toll, the collective symptoms of endometriosis are also  
13 associated with direct and indirect costs that are burdensome to patients. Visits to physicians  
14 and emergency departments, pharmacy claims, and other direct expenses are estimated to cost  
15 between \$12,000 to \$15,000 per patient per year in the United States, and the loss of work and  
16 productivity may amount to additional losses of thousands of dollars per patient.<sup>12,15-18</sup>

17 Most studies examining chronic diseases like endometriosis focus on one or two specific areas  
18 of the disease, such as its social, physical, or psychological impact at a specific point in  
19 time.<sup>19,20</sup> In contrast, few studies have examined the impact of endometriosis on a woman's life  
20 course based on how symptoms and experiences resulting from the disease influence major life  
21 events and decisions (such as whether to pursue educational opportunities, choose a career  
22 path, establish intimate relationships, and plan for a family) and the overall ability of patients to  
23 attain their life goals.<sup>19,20</sup> The few existing studies have small sample sizes or are qualitative,

1  
2  
3 1 relying on informational interviews to ascertain the life-course impact of the disease, but  
4  
5 2 highlight the substantial impacts that endometriosis can have on social activities, intimate  
6  
7 3 relationships, education, work productivity, and psychological well-being.<sup>11,21-23</sup> Understanding  
8  
9 4 life-course impairment, as opposed to focusing on the symptoms of the disease (such as pain or  
10  
11 5 infertility, which are most often addressed individually not holistically), is vital because of the  
12  
13 6 complicated interrelationship among symptoms and their downstream effects. Individual  
14  
15 7 symptoms can influence critical life decisions (eg, work, education, or personal relationships) in  
16  
17 8 ways that are interrelated and can impact other areas of a patient's life. For example, chronic  
18  
19 9 pain may influence the type and amount of work performed or whether a patient decides to work  
20  
21 10 at all, which, in turn, can have financial implications on the patient's lifestyle, family,  
22  
23 11 relationships, or sense of personal fulfillment.<sup>19,20</sup> Symptoms may determine where a patient  
24  
25 12 chooses to live because of financial considerations, healthcare access, or proximity to support  
26  
27 13 networks. Similarly, dyspareunia related to endometriosis may lead some women to avoid  
28  
29 14 intimate relationships, which may have downstream implications for marriage, family planning,  
30  
31 15 and mental and emotional health.<sup>24,25</sup> Cumulatively, persistent symptoms of endometriosis and  
32  
33 16 their impact on daily activities and family and intimate relationships can negatively impact the  
34  
35 17 trajectory of women's lives and are profound and far-reaching.  
36  
37  
38  
39  
40  
41  
42  
43  
44  
45  
46  
47  
48  
49  
50  
51  
52  
53  
54  
55  
56  
57  
58  
59  
60

1 The objective of this multinational survey was to gain a better understanding of patient  
2 perspectives on how endometriosis impacts their daily activities and identify how the disease  
3 may influence women's major life decisions and attainment of their goals. In addition, we sought  
4 to understand the endometriosis-related life-course impacts specifically in women who reported  
5 low optimism or low goal attainment. Insights into a patient's complete experience with  
6 endometriosis are needed to develop and provide access to effective treatments to reduce the  
7 negative impacts of endometriosis on a woman's life course. Greater awareness of the potential  
8 negative life-course impacts of endometriosis is important for helping physicians to identify and  
9 understand patients' needs and improve the long-term management of endometriosis.

## 10 **METHODS**

### 11 **Ethics approval**

12 The Advarra Institutional Review Board (Columbia, MD, USA) reviewed the cross-sectional  
13 survey for participants in the United States and determined that informed consent was not  
14 required (exempt determination #Pro00029982, 26 September 2018). However, participants did  
15 consent to participate in a survey and email invitations were provided to people who opted to  
16 receive communications.

### 17 **Survey development**

18 An online survey was created in a collaborative effort between AbbVie (North Chicago, IL, USA)  
19 and MyHealthTeams (San Francisco, CA, USA), a company that creates social networks for  
20 communities of individuals living with chronic conditions to foster discussion and provide support  
21 among people facing similar circumstances. The survey was programmed and administered

1 through Qualtrics, an online survey tool that allows users to capture survey responses in an  
2 anonymized manner. The survey was provided in English and was available online on the social  
3 media network website MyEndometriosisTeam.com from October 3 through October 25, 2018.  
4 The 14 survey questions about women's experiences with endometriosis were based on our  
5 knowledge about the disease state, existing publications, and online conversations participants  
6 were having (**see Patient and public involvement** for further detail). In addition, the survey  
7 contained 4 screening questions and 6 demographic questions (identified as Supporting  
8 Information). The primary goal of the survey was to capture patients' perspectives on the  
9 negative impacts of endometriosis on different aspects of their life courses, including how  
10 endometriosis has affected their work, education, relationships, overall life decisions, and  
11 attainment of goals. This portion of the survey was modeled after a validated instrument created  
12 to measure life-course impact of disease in patients with psoriasis.<sup>25</sup> Survey questions were  
13 rotated to avoid any bias introduced by order of answer selections. Most survey questions were  
14 closed-ended and provided multiple-choice options to participants; two questions were open-  
15 ended and allowed participants to provide written responses detailing any life accomplishments  
16 they believed were impeded by endometriosis or to offer anything else they wanted to share  
17 about the impact of endometriosis on their lives. Responses were required for all closed-ended  
18 questions; therefore, no imputations for missing data were required. The survey used in this  
19 study is included in the supplementary material.

## 20 **Patient and public involvement**

21 Survey questions were developed based on reviewing conversations members were having on  
22 MyEndometriosisTeam.com to ensure both relevance of topics and patient-focused language.  
23 The social media network, MyEndometriosisTeam.com, was developed for women living with  
24 endometriosis and consists of more than 108,000 members across 13 countries. Based on

1 institutional review board exemption requirements, people were asked at the beginning of the  
2 survey if they agreed to participate, and email invitations were sent only to those people who  
3 opted into receiving communications.

#### 4 **Participant eligibility and recruitment**

5 Members of the social network MyEndometriosisTeam.com were recruited through 33,000 email  
6 invitations. Invitations posted on the public Facebook page for MyEndometriosisTeam recruited  
7 additional women to participate in the survey, which was live on the MyEndometriosisTeam.com  
8 website from October 3 to October 25, 2018. The English-language survey was conducted  
9 among an international population of women who were at least 19 years of age and who self-  
10 identified as having endometriosis. The survey was anonymous and answers could not be  
11 linked to individual members.

#### 12 **Survey analysis**

13 Descriptive statistics were used to tabulate survey responses in this cross-sectional study. After  
14 descriptive statistics were quantified for all respondents, a subanalysis was performed that  
15 restricted the survey responder population to women who “somewhat agreed” or “strongly  
16 agreed” that they were “less positive about the future” (LPAF) or that they “had not reached their  
17 full potential” (NRFP) because of endometriosis. These two questions were selected for this  
18 subanalysis to focus on the life-course impact attributed to endometriosis as identified by those  
19 who reported low optimism or low goal attainment.



**Table 1** Demographics and burden of endometriosis

| Characteristic               | Overall Respondents, n (%) (N=743) | LPAF Respondents, n (%) (N=589) | NRFP Respondents, n (%) (N=556) |
|------------------------------|------------------------------------|---------------------------------|---------------------------------|
| Age at time of survey, years |                                    |                                 |                                 |
| 19–29                        | 206 (28)                           | 179 (30)                        | 155 (28)                        |
| 30–39                        | 339 (46)                           | 269 (46)                        | 259 (47)                        |
| 40–49                        | 180 (24)                           | 128 (22)                        | 129 (23)                        |
| 50 or older                  | 18 (2)                             | 13 (2)                          | 13 (2)                          |

## RESULTS

### Survey response and demographics

A total of 743 women completed the survey (table 1), which was live from October 3 to October 25, 2018.

Among respondents to the English-language survey, 474 (64%) were from the United States, and 269 (36%) were from other countries, including one-fifth from the United Kingdom (17%, n=128), and one-fifth summed from Canada, Australia, South Africa, Ireland, New Zealand, and The Netherlands (table 1). Most women (73%, n=542) were younger than 40 years of age.

Almost half of the respondents (48%, n=355) were unaware of their stage of endometriosis (according to the rASRM scoring system), which was obtained at their most recent surgery.

Among the 52% of respondents who recalled their rASRM score, most (57%, n=223) reported having stage 4 endometriosis (table 1). Baseline demographics were generally comparable between the overall study population and women who identified as LFAP or NRFP (table 1).

| Country                                             |          |          |          |
|-----------------------------------------------------|----------|----------|----------|
| United States (excluding Puerto Rico <sup>a</sup> ) | 474 (64) | 370 (63) | 364 (65) |
| United Kingdom                                      | 128 (17) | 102 (17) | 92 (17)  |
| Canada                                              | 38 (5)   | 32 (5)   | 30 (5)   |
| Australia                                           | 37 (5)   | 31 (5)   | 27 (5)   |
| South Africa                                        | 20 (3)   | 15 (3)   | 9 (2)    |
| Ireland                                             | 17 (2)   | 15 (3)   | 12 (2)   |
| Other                                               | 15 (2)   | 12 (2)   | 13 (2)   |
| New Zealand                                         | 11 (1)   | 9 (2)    | 8 (1)    |
| The Netherlands                                     | 3 (0.4)  | 3 (1)    | 1 (<0.1) |
| Level of education                                  |          |          |          |
| Some high school or less                            | 33 (4)   | 21 (4)   | 20 (4)   |
| High school diploma                                 | 111 (15) | 80 (14)  | 76 (14)  |
| Some college                                        | 214 (29) | 164 (28) | 176 (32) |
| College degree                                      | 254 (34) | 129 (22) | 113 (20) |
| Graduate school/degree                              | 111 (15) | 59 (10)  | 50 (9)   |
| Prefer not to answer                                | 20 (3)   | 15 (3)   | 10 (2)   |
| Endometriosis stage                                 |          |          |          |
| Stage 1                                             | 33 (4)   | 24 (4)   | 22 (4)   |
| Stage 2                                             | 39 (5)   | 28 (5)   | 29 (5)   |
| Stage 3                                             | 93 (13)  | 70 (12)  | 73 (13)  |
| Stage 4                                             | 223 (30) | 191 (32) | 171 (31) |
| Not sure                                            | 355 (48) | 276 (47) | 261 (47) |
| Method of diagnosis                                 |          |          |          |
| Laparoscopic surgery                                | 650 (87) | 518 (88) | 494 (89) |
| Clinical only                                       | 87 (12)  | 66 (11)  | 57 (10)  |
| Not sure                                            | 6 (0.8)  | 5 (1)    | 5 (1)    |

<sup>a</sup>Patients from Puerto Rico were separated from the United States population into the "other" category due to IRB exemption qualifications that were different for residents of Puerto Rico versus residents of the 50 states of the United States.

## 1 Diagnosis and symptoms

### 2 Diagnosis

1  
2  
3 1 Women began experiencing symptoms of endometriosis at a young age, with many  
4  
5 2 experiencing symptoms by age 15. Most women (74%, n=549) reported having a diagnosis of  
6  
7 3 endometriosis made more than 3 years after the appearance of symptoms (average delay of  
8  
9 4 approximately 9 years). Nearly half of women (42%, n=313) said it took 10 years or longer after  
10  
11 5 the initial onset of their symptoms to receive a surgical or clinical diagnosis of endometriosis.  
12  
13 6 The younger the woman's age at symptom onset, the longer the delay; it took, on average, 13  
14  
15 7 years to reach a surgical diagnosis for women who began experiencing symptoms by age 13.  
16  
17 8 Most women (87%, n=650) reported their diagnosis had been confirmed by laparoscopy (table  
18  
19 9 1).

#### 10 *Endometriosis-associated pain*

11 Most women (56%, n=415) reported experiencing pain daily and nearly an additional one-  
12  
13 12 quarter of them reported feeling endometriosis-associated pain a few times per week. When  
14  
15 13 asked to rate how severe their pain was in the last 12 months on a scale from 0 (no pain) to 10  
16  
17 14 (worst imaginable pain), more than half of the respondents (54%) rated their worst pain within  
18  
19 15 the last 12 months as a 9 or 10. About two-thirds of women reported their endometriosis-  
20  
21 16 associated pain had worsened over the years when asked if endometriosis-related pain had  
22  
23 17 gotten better, worse, or stayed the same.

#### 18 **Life-course impairment**

##### 19 *Education and employment potential*

20 Many of the women surveyed said they "somewhat agreed" or "strongly agreed" that they had  
21  
22 21 experienced difficulties achieving their educational goals (40%, n=290) or had missed school  
23  
24 22 (55%, n=413) because of endometriosis-associated symptoms (figure 1A). Almost half of

1 participants (45%, n=338) “somewhat agreed” or “strongly agreed” that they could not work full  
2 time, and a similar percentage (47%, n=355) reported not working at a job they would have  
3 preferred. Most reported that they had missed work (74%, n=550) or earned less money than  
4 they could have (54%, n=404) because of endometriosis-associated symptoms. These findings  
5 were consistent among patients in the United States compared with the rest of the world  
6 (supporting information figure 1).

### 7 *Relationships and social engagements*

8 Most women “somewhat agreed” or “strongly agreed” that endometriosis-associated symptoms  
9 led to problems in their intimate relationships (83%, n=613) and/or created a barrier to starting a  
10 family (58%, n=431). Most women similarly believed that endometriosis-associated symptoms  
11 had led them to limit their social activities (82%, n=609), made them less outgoing (81%,  
12 n=602), and caused them to travel less (59%, n=434) (figure 1B).

### 13 *Physical well-being*

14 Most women “somewhat agreed” or “strongly agreed” endometriosis limited their ability to stay  
15 active (79%, n=588) and maintain a healthy diet (55%, n=406) (figure 1C). A high proportion of  
16 women (43%, n=323) perceived that endometriosis-associated symptoms resulted in use of  
17 alcohol, drugs, or cigarettes.

### 18 *Life-course impairment overall*

19 Overall, most women (80%, n=601) “somewhat agreed” or “strongly agreed” endometriosis-  
20 associated symptoms had caused them to lose time from their daily lives (figure 1D). A similar  
21 number of women reported that they were less positive about the future because of their  
22 endometriosis-associated symptoms (80%, n=589), and 75% (n=556) “somewhat agreed” or

1  
2  
3 1 “strongly agreed” that endometriosis-associated symptoms had kept them from reaching their  
4  
5 2 full potential in life.  
6  
7

### 9 3 **Experiences and emotions associated with endometriosis**

10 4 Women reported that numerous experiences attributed to endometriosis had altered their life  
11  
12 5 potential in a negative way (figure 2A) or negatively impacted their lives in other ways  
13  
14 6 (figure 2B). The most frequent responses were common symptoms of endometriosis, including  
15  
16 7 pelvic pain apart from menstruation, painful menstruation, pelvic pain during menstruation, and  
17  
18 8 painful sexual intercourse.  
19  
20  
21

22  
23  
24  
25 9 Most women surveyed reported that endometriosis impacted their ability to perform daily tasks  
26  
27 10 (81%, n=594); however, many of the negative experiences attributed to endometriosis were  
28  
29 11 related to the use of healthcare services and treatments. For example, women reported taking  
30  
31 12 prescription pain medications (72%, n=529), visiting emergency departments (66%, n=485),  
32  
33 13 having multiple surgeries (55%, n=406), being hospitalized overnight (43%, n=313), taking  
34  
35 14 prescription medication for depression or anxiety (52%, n=380), or seeing a mental health  
36  
37 15 professional because of their endometriosis-associated symptoms (43%, n=316). Around half of  
38  
39 16 the women surveyed reported that the experiences that most negatively impacted their lives  
40  
41 17 were their need to take prescription medication (57%, n=427) and the multiple surgeries for  
42  
43 18 endometriosis (49%, n=363). In addition, most women surveyed reported several negative  
44  
45 19 emotions that they attributed to endometriosis, including feeling depressed (83%, n=607),  
46  
47 20 anxious (81%, n=592), unsexy (78%, n=572), or having low self-esteem (75%, n=554; figure  
48  
49 21 2C).  
50  
51  
52  
53  
54  
55  
56  
57  
58  
59  
60

1  
2  
3 1 Women managed the impact of their endometriosis in different ways (figure 2D). Most  
4  
5 2 commonly, this included talking to a spouse or partner about their condition, using non-medical  
6  
7 3 strategies (such as diet or exercise) to control their pain, and seeking support from friends and  
8  
9 4 family.  
10  
11  
12

13  
14 5 **Additional analysis of women who believed their future and life potential were more**  
15  
16 6 **impacted by endometriosis**  
17

18  
19 7 Most of the sample included women who “somewhat agreed” or “strongly agreed” that they were  
20  
21 8 LPAF (80%; n=589) or had NRFP in life (75%; n=556) because of endometriosis, and several  
22  
23 9 questions limited to these women were further analyzed (Supporting Information table 1).  
24  
25 10 Overall, the observational data in this study suggested women who believed they were LPAF or  
26  
27 11 had NRFP generally reported more negative experiences than the fewer respondents who did  
28  
29 12 not indicate they were LPAF (non-LPAF, 21%; n=154) or had NRFP (non-NRFP, 25%; n=187).  
30  
31 13 Daily pain was reported by a higher proportion of women who believed they were LPAF or had  
32  
33 14 NRPF because of endometriosis, compared with other women (62% LPAF vs 34% non-LPAF;  
34  
35 15 61% NRFP vs 40% non-NRFP; Supporting Information table 1A). More women who believed  
36  
37 16 they were LPAF or had NRFP also reported negative experiences related to education and work  
38  
39 17 they attributed to endometriosis, including having earned less money (61% LPAF vs 29% non-  
40  
41 18 LPAF; 66% NRFP vs 21% non-NRFP), not working a preferred job (54% LPAF vs 25% non-  
42  
43 19 LPAF; 58% NRFP vs 17% non-NRFP), or not achieving educational goals (44% LPAF vs 21%  
44  
45 20 non-LPAF; 47% NRFP vs 16% non-NRFP) (Supporting Information table 1B). A higher  
46  
47 21 proportion of women who believed their future and life potential were more impacted by their  
48  
49 22 disease reported endometriosis-related experiences altered their life potential in a negative way  
50  
51 23 (Supporting Information table 1C). Similarly, more of these women reported negative  
52  
53 24 experiences and emotions they attributed to endometriosis (Supporting Information table 1D, E).  
54  
55  
56  
57  
58  
59  
60

1  
2  
3 1 All women used similar strategies to cope with and mitigate the impact of endometriosis on their  
4  
5 2 lives (Supporting Information table 1F).  
6

7 3

9 4 **DISCUSSION**

11  
12  
13  
14 5 A survey of women with endometriosis who self-reported pronounced symptoms also reported  
15  
16 6 experiences that were perceived by them to negatively impact their views of the future and  
17  
18 7 overall life potential. For many women, endometriosis-associated symptoms negatively affect  
19  
20 8 various areas of their lives, including education and employment, relationships and social  
21  
22 9 engagements, and physical well-being. Participants indicated that adverse experiences related  
23  
24 10 to management of their disease and its impact on everyday life also believed that their future  
25  
26 11 and life potential were negatively impacted by endometriosis.  
27

28  
29  
30 12 Examining the cumulative life-course impact of endometriosis may influence a physician's ability  
31  
32 13 to understand a woman's complete experience with the disease, help identify patients who are  
33  
34 14 most vulnerable to its impacts, and inform options for management.<sup>9,20,22,26</sup> A fuller  
35  
36 15 understanding of the life-course impact of endometriosis may also elucidate patterns of patient  
37  
38 16 needs and identify which forms of supportive multidisciplinary care are necessary, including the  
39  
40 17 need for early referral to specialists and other professionals who provide complementary  
41  
42 18 healthcare. These needs are likely to change over time, during the different phases of each  
43  
44 19 patient's life. For example, teams that include gynecologists and pain specialists may help  
45  
46 20 patients manage endometriosis-associated pain symptoms; reproductive endocrinologists may  
47  
48 21 help manage infertility, if this occurs; sexual health counselors may collaborate with patients  
49  
50 22 who have dyspareunia; and counselors/psychologists may assist with chronic stress and mental  
51  
52 23 health issues.<sup>27</sup> Physicians who are responsive to patients' individual needs and values can  
53  
54 24 positively support overall quality of life in those patients who experience infertility<sup>28,29</sup> and other  
55  
56  
57  
58  
59  
60

1  
2  
3 1 negative symptoms of endometriosis, such as chronic abdominal pain, dysmenorrhea, and  
4  
5 2 dyspareunia.<sup>24</sup> Endometriosis may also contribute to social inequalities; further research is  
6  
7 3 needed to explore this topic and develop social policies to address these inequalities.  
8  
9

10  
11 4 The severity of pain reported by women who completed the online survey indicates that  
12  
13 5 respondents in our study may have had a greater symptom burden than did women participating  
14  
15 6 in previous studies using similar pain scales.<sup>30-32</sup> Women in our study also reported slightly  
16  
17 7 lengthier delays in diagnosis after the onset of their first symptoms. Findings in previous studies  
18  
19 8 have illustrated that delays are common in diagnosing endometriosis.<sup>15,33-41</sup> Although some  
20  
21 9 recent literature suggests that the delay in diagnosis may be slowly improving,<sup>39</sup> the use of non-  
22  
23 10 invasive and accurate diagnostic tools could improve diagnosis times and reduce women's pain  
24  
25 11 and distress.<sup>41,42</sup> The delays in diagnosis reported by our study participants and others indicate  
26  
27 12 many women experiencing troublesome symptoms of endometriosis may still wait extended  
28  
29 13 periods before receiving a definitive diagnosis and initiating treatment.  
30  
31  
32  
33

34  
35 14 The higher pain burden and longer diagnostic delay reported in our sample, which may include  
36  
37 15 higher numbers of women who sought social network support because they were more  
38  
39 16 frustrated with their disease experience, could conceivably be due in part to their longer  
40  
41 17 struggles with more challenging symptoms than would be observed in the general population of  
42  
43 18 women with diagnosed endometriosis. Results from a recent study using the same social  
44  
45 19 network to recruit participants found that the majority of respondents rated their worst pain  
46  
47 20 higher than 7 on a 10-point scale, only a little lower than the pain rating given by the women in  
48  
49 21 our study.<sup>43</sup> Additionally, the previous study participants also experienced a diagnostic delay,  
50  
51 22 supporting the theory that recruitment from this member-centered network may draw more  
52  
53 23 women who have struggled longer with their disease.<sup>43</sup> Interestingly, overall trends in diagnostic  
54  
55 24 delays observed between age groups in our study are consistent with reports in previous  
56  
57  
58  
59  
60



1  
2  
3 1 research, ie, women whose symptom onset occurred at a younger age experienced longer  
4  
5 2 times to diagnosis.<sup>15,35,39</sup>  
6  
7  
8  
9 3 Many respondents said they missed school and were generally unable to achieve their  
10  
11 4 educational goals because of endometriosis. There is a dearth of research on the impact of  
12  
13 5 endometriosis on women's educational aspirations and their ability to achieve goals due to  
14  
15 6 endometriosis-associated symptoms, compared with the impact endometriosis has on  
16  
17 7 professional work or other areas of life.<sup>9</sup> Findings from some existing studies suggest  
18  
19 8 endometriosis-associated symptoms may impact grades, attendance, or completion of  
20  
21 9 educational programs.<sup>21,22,44</sup> Although informative, these studies were more qualitative in nature  
22  
23 10 and involved small sample sizes.<sup>21,22,44</sup> A quantitative study examining the lives of 78 women  
24  
25 11 15 years after receiving a verified diagnosis of endometriosis found only a fraction of women  
26  
27 12 reported that their disease had a negative impact on their education.<sup>11</sup> However, the women  
28  
29 13 included in that study seemed to report less frequent pain and endometriosis-related effects, like  
30  
31 14 depression, compared with the reports made by women in our study. Furthermore, the small  
32  
33 15 sample was collected at a single Norwegian hospital and the findings may not be representative  
34  
35 16 of women's experiences with endometriosis on a wider scale.<sup>11</sup> Regardless, any impact on  
36  
37 17 education is concerning, and our study results emphasize the need for additional research into  
38  
39 18 this overlooked area in women with endometriosis. Research on other medical conditions, like  
40  
41 19 adolescent fibromyalgia, supports that chronic pain can negatively impact education, reinforcing  
42  
43 20 the likelihood that endometriosis may have a similar impact.<sup>45,46</sup>  
44  
45  
46  
47  
48  
49 21 Respondents in the current study also reported endometriosis-associated symptoms caused  
50  
51 22 them to miss work, earn less money, prevented them from a job they would have preferred, or  
52  
53 23 impeded their working full time or part time. Many health conditions that can occur with  
54  
55 24 endometriosis can impact work productivity and potential, including depression, other chronic

1 pain conditions or disorders, and digestive disorders.<sup>47</sup> Endometriosis was self-reported by  
2 respondents in this study, and it is possible that other chronic conditions (particularly, chronic  
3 overlapping pain conditions) may also contribute to women's perceived interference with  
4 productivity and employment opportunities. Indeed, more than half of women with symptomatic  
5 endometriosis can present with comorbid pain syndromes,<sup>48</sup> and these may include conditions  
6 associated with pelvic pain, like dysmenorrhea, irritable bowel syndrome, or painful bladder  
7 syndrome.<sup>49,50</sup> Findings from previous studies have also illustrated that endometriosis-  
8 associated symptoms may lead to losses in productivity both at home and in the workplace,  
9 potentially impacting professional achievement.<sup>12,38,51,52</sup> In our study, higher proportions of  
10 women who indicated that they were LPAF or had NRFP because of endometriosis reported  
11 painful symptoms and negative experiences compared with other respondents. Also, women  
12 who were LPAF or had NRFP more often believed it was harder to perform daily tasks because  
13 of their disease.

14 Our results further support that endometriosis symptoms are disruptive and may lead to loss of  
15 productivity, ultimately influencing women's major life decisions or consequences, including  
16 whether to work at reduced capacity or pursue preferred jobs. Results from a recent multicenter  
17 study of women with confirmed endometriosis and a matched comparison group found the  
18 disease forced some women to seek work outside desired professions, which, in turn, resulted  
19 in health-related limitations in career choices.<sup>52</sup> These collective findings are concerning  
20 because satisfaction in a chosen profession—or, at a minimum, the options available to make  
21 life decisions regarding one's profession—is an important component of an overall satisfying  
22 quality of life, and the decision to work less or pursue a less desirable job may have  
23 downstream implications for women's finances, relationships, social lives, or travel  
24 decisions.<sup>19,52</sup>

1  
2  
3 1 Respondents to our survey reported endometriosis had a negative impact on their relationships,  
4  
5 2 social engagements, and ability to have children (when desired), which is consistent with  
6  
7 3 findings from a host of previous studies that demonstrated the negative impacts of  
8  
9 4 endometriosis on social well-being and health-related quality of life.<sup>9,12,38,51</sup> Interestingly, 46% of  
10  
11 5 women in our study reported experiencing infertility, which is slightly higher than the 14%–40%  
12  
13 6 range reported in previous studies, again hinting at our population's higher symptom  
14  
15 7 burden.<sup>38,43,53</sup> Other chronic pain conditions have also impacted these life-course components,  
16  
17 8 including conditions related to musculoskeletal pain and chronic back pain.<sup>54,55</sup>  
18  
19  
20  
21 9 Similar to decisions involving education and professional achievement, life choices involving the  
22  
23 10 pursuit of intimate relationships or starting a family may have downstream implications in other  
24  
25 11 areas, like finance, psychological well-being, or employment, which may have their own  
26  
27 12 downstream impacts on additional aspects of a person's life course.<sup>19</sup> Likewise, women  
28  
29 13 frequently reported not being physically active and having poorer diets because of their disease.  
30  
31 14 Although few studies have examined this aspect of endometriosis, findings from two smaller  
32  
33 15 studies have suggested that pain associated with the disease may also have a negative impact  
34  
35 16 on exercise and nutrition.<sup>9,34,56</sup>  
36  
37  
38  
39  
40 17 Of particular concern was the view of many women that their disease made them increase their  
41  
42 18 use of alcohol, drugs, or cigarettes. Research into whether pain and experiences related to  
43  
44 19 endometriosis may be associated with higher rates of substance abuse is severely lacking.  
45  
46 20 However, there are demonstrated associations between other chronic pain conditions and  
47  
48 21 substance abuse that support our finding.<sup>57,58</sup> The results from our study draw attention to this  
49  
50 22 issue and highlight substance abuse as an important avenue for additional investigation.  
51  
52  
53  
54  
55  
56  
57  
58  
59  
60

1 The findings from our study indicate that women with endometriosis may experience many  
2 healthcare-related side effects. Of particular concern, patients noted that treatments meant to  
3 help reduce the burden of endometriosis may have their own negative impact. Many women  
4 perceived that use of prescription medications and multiple surgeries to control the symptoms of  
5 endometriosis had a negative impact on their life potential, and this response was stronger in  
6 women who indicated they were LPAF or believed they had NRFP due to their disease. Results  
7 from one recent study showed that medical treatment for a condition may increase a patient's  
8 stress levels and potentially affect their psychological health.<sup>59</sup> Patients who were taking  
9 prescription medications and who experienced more challenging adverse effects from their  
10 therapies had higher perceived stress levels, and women undergoing multiple surgeries were  
11 especially impacted. These reports underscore the potential value of supportive psychological  
12 care for patients with endometriosis as part of effective long-term disease management.

13 Limitations of this study include the selection of participants from an online community with  
14 voluntary participation, no targeted sampling, and no way to calculate a response rate. The  
15 participants were generally well educated, had access to health care, and participated in an  
16 online social network. Data on race, ethnicity, or socioeconomic status were not collected.  
17 Patients who experienced the most significant psychosocial impacts of endometriosis or lacked  
18 the resources to access the online community may not have been represented in the sample  
19 population, whereas the patients who were most affected by severe pelvic pain may have been  
20 more likely to participate in the study. These factors may have led to self-selection bias;  
21 therefore, the results of this study may not be generalizable to the overall population of patients  
22 with endometriosis.

23 In general, women experienced a range of consequences that they attributed to living with and  
24 managing the limitations imposed by endometriosis. In addition to pain, women reported that the

1  
2  
3 1 endometriosis-related experiences that most impacted their lives in a negative way included  
4  
5 2 depression or anxiety (80%), heavy menstrual bleeding (71%), the need to take prescription  
6  
7 3 treatments (57%) or undergo multiple surgeries (49%), or infertility (46%). In other studies,  
8  
9 4 women have reported not feeling “normal” or feminine, experiencing a range of negative  
10  
11 5 emotions (eg, anger, depression, hopelessness, disappointment, and exhaustion), having  
12  
13 6 limited physical or sexual activity, struggling to find appropriate treatments, feeling guilt over  
14  
15 7 disrupted relationships, and suffering in silence due to endometriosis-related  
16  
17 8 symptoms.<sup>22,23</sup> While each woman experienced the impact of endometriosis differently, the  
18  
19 9 majority believed that they were living life less fully than they could have because of their  
20  
21 10 endometriosis-associated symptoms. This belief was informed by the symptoms and healthcare  
22  
23 11 requirements they faced, and, in turn, may have influenced major life decisions that could have  
24  
25 12 their own deleterious effects on personal fulfillment and life potential. The interconnectedness of  
26  
27 13 effects triggered by major life decisions highlights the importance of conducting further research  
28  
29 14 into the cumulative burden of debilitating diseases like endometriosis within the context of an  
30  
31 15 individual’s life course.  
32  
33  
34  
35  
36

## 37 **CONCLUSIONS**

38  
39  
40  
41 17 Most women in our international survey experienced a high burden associated with the disease  
42  
43 18 and reported that endometriosis-associated pain and associated experiences had a negative  
44  
45 19 impact on their outlook about their future and overall life potential. Women believed  
46  
47 20 endometriosis impacted life decisions surrounding education, their professional lives, their social  
48  
49 21 lives, and their physical well-being. Our study of the impact of endometriosis on a woman’s life  
50  
51 22 course helps provide a clearer understanding of her complete experience with their disease.  
52  
53 23 Our findings also suggest there is a need to develop early, effective treatments and to provide  
54  
55 24 access to effective treatment to limit the impact of endometriosis on a woman’s life course.  
56  
57  
58  
59  
60

1

For peer review only

1  
2  
3 1 **Acknowledgements** Financial assistance in developing the survey and collecting data was  
4 provided by AbbVie. In partnership with MyHealthTeams, AbbVie participated in the  
5  
6 2 interpretation of data, review, and approval of the manuscript, and was involved in the decision  
7  
8 3 to submit the manuscript for publication. Medical writing support, funded by AbbVie, was  
9  
10 4 provided by Michael M. Schofield, PhD, and Kersten Reich, MPH, CMPP™, of JB Ashtin, who  
11  
12 5 developed the first draft based on an author-approved outline and assisted in implementing  
13  
14 6 author revisions.  
15  
16 7

17  
18  
19  
20 8 **Contributors:** SAM, FT, OAF, AH, BS, and SA-S contributed to the study concept and design.  
21  
22 9 BS contributed to data acquisition and statistical analysis. SAM, FT, AMS, SEC, SC, SE, OAF,  
23  
24 10 AH, BS, and SA-S contributed to data interpretation.  
25  
26

27  
28 11 **Funding** Financial support for this study was provided by AbbVie Inc. Award/Grant number is  
29  
30 12 not applicable.  
31  
32

33 13  
34  
35 14  
36  
37 15 **Competing interests** SA Missmer is a consultant for AbbVie, Oratel Diagnostics, and Celmatix  
38  
39 16 and receives research support from the National Institutes of Health, Department of Defense,  
40  
41 17 and Marriott Family Foundations.  
42  
43

44  
45  
46  
47 18 FF Tu has received research support from NICHD-NIH and NIDDK-NIH, earns royalties from  
48  
49 19 UpToDate, has served as a consultant for AbbVie, Myovant, and Uroshape, and conducts  
50  
51 20 sponsored research for Eximis and Dot Laboratories.  
52  
53

54 21  
55  
56  
57  
58  
59  
60

1  
2  
3 1 AM Soliman, S Chiuve, S Cross, S Eichner, and O Antunez Flores are employees of AbbVie  
4  
5 2 and may own AbbVie stock/stock options.  
6  
7

8  
9 3 A Horne has received grant funding from the UK MRC, NIHR, CSO, Wellbeing of Women,  
10  
11 4 Ferring, AstraZeneca, the Charles Wolfson Charitable Trust, and Standard Life. His institution  
12  
13 5 has received consultancy fees from Roche Diagnostics, Nordic Pharma, Ferring and AbbVie. He  
14  
15 6 is Chair of the RCOG Academic Board, ESHRE National Representative for the UK, WES  
16  
17 7 Board Member and Ambassador, SEUD Board Member, Trustee and Medical Advisor to  
18  
19 8 Endometriosis UK, and Medical Advisor to Pelvic Pain Support Network.  
20  
21

22  
23  
24 9 B Schneider is an employee of MyHealthTeams, which received compensation for the study and  
25  
26 10 conducted the research on behalf of AbbVie.  
27  
28

29  
30 11 S As-Sanie earns author royalties from UpToDate and has served as a consultant for AbbVie,  
31  
32 12 Myovant, and Eximis.  
33  
34

### 35 36 13 **Data Sharing Statement**

37  
38  
39 14 AbbVie is committed to responsible data sharing regarding the clinical trials and  
40  
41 15 studies we sponsor. This includes access to anonymized, individual and trial-level data  
42  
43 16 (analysis data sets), as well as other information (eg, protocols and clinical study  
44  
45 17 reports), as long as the trials are not part of an ongoing or planned regulatory  
46  
47 18 submission. This includes requests for clinical trial data for unlicensed products and  
48  
49 19 indications.  
50  
51

52  
53 20 This study data can be requested by any qualified researchers who engage in rigorous,  
54  
55 21 independent scientific research, and will be provided following review and approval of a  
56  
57  
58  
59  
60



1  
2  
3 1 research proposal and statistical analysis plan and execution of a data sharing  
4  
5 2 agreement. Data requests can be submitted at any time and the data will be accessible  
6  
7 3 for 12 months, with possible extensions considered. For more information on the  
8  
9 4 process, or to submit a request, visit the following link: [https://www.abbvie.com/our-](https://www.abbvie.com/our-science/clinical-trials/clinical-trials-data-and-information-sharing/data-and-information-sharing-with-qualified-researchers.html)  
10  
11 science/clinical-trials/clinical-trials-data-and-information-sharing/data-and-information-  
12 5 sharing-with-qualified-researchers.html.  
13  
14 6  
15  
16 7

For peer review only

**1 REFERENCES**

1. Zondervan KT, Becker CM, Missmer SA. Endometriosis. *N Engl J Med* 2020;382:1244-56.
2. Kennedy S, Bergqvist A, Chapron C, *et al*. Eshre guideline for the diagnosis and treatment of endometriosis. *Hum Reprod* 2005;20:2698-704.
3. Practice bulletin no. 114: Management of endometriosis. *Obstet Gynecol* 2010;116:223-36.
4. Zondervan KT, Becker CM, Koga K, *et al*. Endometriosis. *Nat Rev Dis Primers* 2018;4:9.
5. De Graaff AA, D'Hooghe TM, Dunselman GA, *et al*. The significant effect of endometriosis on physical, mental and social wellbeing: Results from an international cross-sectional survey. *Hum Reprod* 2013;28:2677-85.
6. Gallagher JS, DiVasta AD, Vitonis AF, *et al*. The impact of endometriosis on quality of life in adolescents. *J Adolesc Health* 2018;63:766-72.
7. Lagana AS, La Rosa VL, Rapisarda AMC, *et al*. Anxiety and depression in patients with endometriosis: Impact and management challenges. *Int J Womens Health* 2017;9:323-30.
8. Vannuccini S, Lazzeri L, Orlandini C, *et al*. Mental health, pain symptoms and systemic comorbidities in women with endometriosis: A cross-sectional study. *J Psychosom Obstet Gynaecol* 2018;39:315-20.
9. Culley L, Law C, Hudson N, *et al*. A qualitative study of the impact of endometriosis on male partners. *Hum Reprod* 2017;32:1667-73.
10. Denny E, Mann CH. Endometriosis-associated dyspareunia: The impact on women's lives. *J Fam Plann Reprod Health Care* 2007;33:189-93.

- 1  
2  
3 1 11. Fagervold B, Jenssen M, Hummelshoj L, *et al*. Life after a diagnosis with endometriosis - a  
4 2 15 years follow-up study. *Acta Obstet Gynecol Scand* 2009;88:914-9.  
5  
6  
7  
8 3 12. Soliman AM, Coyne KS, Gries KS, *et al*. The effect of endometriosis symptoms on  
9 4 absenteeism and presenteeism in the workplace and at home. *J Manag Care Spec Pharm*  
10 5 2017;23:745-54.  
11  
12  
13  
14  
15 6 13. Leonardi M, Horne AW, Armour M, *et al*. Endometriosis and the coronavirus (covid-19)  
16 7 pandemic: Clinical advice and future considerations. *Frontiers in Reproductive Health* 2020;2  
17  
18  
19  
20 8 14. Leonardi M, Horne AW, Vincent K, *et al*. Self-management strategies to consider to combat  
21 9 endometriosis symptoms during the covid-19 pandemic. *Hum Reprod Open*  
22 10 2020;2020:hoaa028.  
23  
24  
25  
26  
27 11 15. Klein S, D'Hooghe T, Meuleman C, *et al*. What is the societal burden of endometriosis-  
28 12 associated symptoms? A prospective belgian study. *Reprod Biomed Online* 2014;28:116-24.  
29  
30  
31  
32 13 16. Simoens S, Dunselman G, Dirksen C, *et al*. The burden of endometriosis: Costs and quality  
33 14 of life of women with endometriosis and treated in referral centres. *Hum Reprod*  
34 15 2012;27:1292-9.  
35  
36  
37  
38  
39 16 17. Soliman AM, Taylor HS, Bonafede M, *et al*. Incremental direct and indirect cost burden  
40 17 attributed to endometriosis surgeries in the united states. *Fertil Steril* 2017;107:1181-90 e2.  
41  
42  
43  
44 18 18. Soliman AM, Yang H, Du EX, *et al*. The direct and indirect costs associated with  
45 19 endometriosis: A systematic literature review. *Hum Reprod* 2016;31:712-22.  
46  
47  
48  
49 20 19. Bhatti Z, Salek M, Finlay A. Chronic diseases influence major life changing decisions: A new  
50 21 domain in quality of life research. *J R Soc Med* 2011;104:241-50.  
51  
52  
53  
54  
55  
56  
57  
58  
59  
60

- 1  
2  
3 1 20. Kimball AB, Gieler U, Linder D, *et al*. Psoriasis: Is the impairment to a patient's life  
4 2 cumulative? *J Eur Acad Dermatol Venereol* 2010;24:989-1004.  
5  
6  
7  
8 3 21. Huntington A, Gilmour JA. A life shaped by pain: Women and endometriosis. *J Clin Nurs*  
9 4 2005;14:1124-32.  
10  
11  
12  
13 5 22. Moradi M, Parker M, Sneddon A, *et al*. Impact of endometriosis on women's lives: A  
14 6 qualitative study. *BMC Womens Health* 2014;14:123.  
15  
16  
17  
18 7 23. Cole JM, Grogan S, Turley E. "The most lonely condition i can imagine": Psychosocial  
19 8 impacts of endometriosis on women's identity. *Feminism & Psychology* 2021;31:171-91.  
20  
21  
22  
23 9 24. Apers S, Dancet EAF, Aarts JWM, *et al*. The association between experiences with patient-  
24 10 centred care and health-related quality of life in women with endometriosis. *Reprod Biomed*  
25 11 *Online* 2018;36:197-205.  
26  
27  
28  
29  
30 12 25. Witzeman K, Antunez Flores O, Renzelli-Cain RI, *et al*. Patient-physician interactions  
31 13 regarding dyspareunia with endometriosis: Online survey results. *J Pain Res* 2020;13:1579-  
32 14 89.  
33  
34  
35  
36  
37 15 26. Oehmke F, Weyand J, Hackethal A, *et al*. Impact of endometriosis on quality of life: A pilot  
38 16 study. *Gynecol Endocrinol* 2009;25:722-5.  
39  
40  
41  
42 17 27. Ugwumadu L, Chakrabarti R, Williams-Brown E, *et al*. The role of the multidisciplinary team  
43 18 in the management of deep infiltrating endometriosis. *Gynecol Surg* 2017;14:15.  
44  
45  
46  
47  
48 19 28. Aarts JW, Huppelschoten AG, van Empel IW, *et al*. How patient-centred care relates to  
49 20 patients' quality of life and distress: A study in 427 women experiencing infertility. *Hum*  
50 21 *Reprod* 2012;27:488-95.  
51  
52  
53  
54  
55  
56  
57  
58  
59  
60

- 1  
2  
3 1 29. Gameiro S, Canavarro MC, Boivin J. Patient centred care in infertility health care: Direct and  
4 2 indirect associations with wellbeing during treatment. *Patient Educ Couns* 2013;93:646-54.  
5  
6  
7  
8 3 30. Bourdel N, Alves J, Pickering G, *et al*. Systematic review of endometriosis pain assessment:  
9 4 How to choose a scale? *Hum Reprod Update* 2015;21:136-52.  
10  
11  
12  
13 5 31. Chawla S. Treatment of endometriosis and chronic pelvic pain with letrozole and  
14 6 norethindrone acetate. *Med J Armed Forces India* 2010;66:213-5.  
15  
16  
17  
18 7 32. Facchin F, Barbara G, Saita E, *et al*. Impact of endometriosis on quality of life and mental  
19 8 health: Pelvic pain makes the difference. *J Psychosom Obstet Gynaecol* 2015;36:135-41.  
20  
21  
22  
23 9 33. Ballard K, Lowton K, Wright J. What's the delay? A qualitative study of women's experiences  
24 10 of reaching a diagnosis of endometriosis. *Fertil Steril* 2006;86:1296-301.  
25  
26  
27  
28 11 34. Bernuit D, Ebert AD, Halis G, *et al*. Female perspectives on endometriosis: Findings from  
29 12 the uterine bleeding and pain women's research study. *Journal of Endometriosis* 2011;3:73-  
30 13 85.  
31  
32  
33  
34 14 35. Greene R, Stratton P, Cleary SD, *et al*. Diagnostic experience among 4,334 women  
35 15 reporting surgically diagnosed endometriosis. *Fertil Steril* 2009;91:32-9.  
36  
37  
38  
39 16 36. Hadfield R, Mardon H, Barlow D, *et al*. Delay in the diagnosis of endometriosis: A survey of  
40 17 women from the USA and the uk. *Hum Reprod* 1996;11:878-80.  
41  
42  
43  
44 18 37. Hudelist G, Fritzer N, Thomas A, *et al*. Diagnostic delay for endometriosis in austria and  
45 19 germany: Causes and possible consequences. *Hum Reprod* 2012;27:3412-6.  
46  
47  
48  
49 20 38. Nnoaham KE, Hummelshoj L, Webster P, *et al*. Impact of endometriosis on quality of life  
50 21 and work productivity: A multicenter study across ten countries. *Fertil Steril* 2011;96:366-73  
51 22 e8.  
52  
53  
54  
55  
56  
57  
58  
59  
60

- 1  
2  
3 1 39. Soliman AM, Fuldeore M, Snabes MC. Factors associated with time to endometriosis  
4 2 diagnosis in the united states. *J Womens Health (Larchmt)* 2017;26:788-97.  
5  
6  
7  
8 3 40. Staal AH, van der Zanden M, Nap AW. Diagnostic delay of endometriosis in the  
9 4 netherlands. *Gynecol Obstet Invest* 2016;81:321-4.  
10  
11  
12  
13 5 41. Nnoaham KE, Hummelshoj L, Kennedy SH, *et al*. Developing symptom-based predictive  
14 6 models of endometriosis as a clinical screening tool: Results from a multicenter study. *Fertil*  
15 7 *Steril* 2012;98:692-701 e5.  
16  
17  
18  
19  
20 8 42. Brosens I, Puttemans P, Campo R, *et al*. Non-invasive methods of diagnosis of  
21 9 endometriosis. *Curr Opin Obstet Gynecol* 2003;15:519-22.  
22  
23  
24  
25 10 43. Lamvu G, Antunez-Flores O, Orady M, *et al*. Path to diagnosis and women's perspectives  
26 11 on the impact of endometriosis pain. *Journal of Endometriosis and Pelvic Pain Disorders*  
27 12 2020:2284026520903214.  
28  
29  
30  
31  
32 13 44. Gilmour JA, Huntington A, Wilson HV. The impact of endometriosis on work and social  
33 14 participation. *Int J Nurs Pract* 2008;14:443-8.  
34  
35  
36  
37 15 45. Murray CB, Groenewald CB, de la Vega R, *et al*. Long-term impact of adolescent chronic  
38 16 pain on young adult educational, vocational, and social outcomes. *Pain* 2020;161:439-45.  
39  
40  
41  
42 17 46. Kashikar-Zuck S, Lynch AM, Graham TB, *et al*. Social functioning and peer relationships of  
43 18 adolescents with juvenile fibromyalgia syndrome. *Arthritis Rheum* 2007;57:474-80.  
44  
45  
46  
47  
48 19 47. de Graaf R, Tuithof M, van Dorsselaer S, *et al*. Comparing the effects on work performance  
49 20 of mental and physical disorders. *Soc Psychiatry Psychiatr Epidemiol* 2012;47:1873-83.  
50  
51  
52  
53  
54  
55  
56  
57  
58  
59  
60

- 1  
2  
3 1 48. Smorgick N, Marsh CA, As-Sanie S, *et al*. Prevalence of pain syndromes, mood conditions,  
4 2 and asthma in adolescents and young women with endometriosis. *J Pediatr Adolesc Gynecol*  
5 3 2013;26:171-5.  
6  
7  
8  
9  
10 4 49. Yosef A, Allaire C, Williams C, *et al*. Multifactorial contributors to the severity of chronic  
11 5 pelvic pain in women. *Am J Obstet Gynecol* 2016;215:760 e1-60 e14.  
12  
13  
14  
15 6 50. Evans SF, Brooks TA, Esterman AJ, *et al*. The comorbidities of dysmenorrhea: A clinical  
16 7 survey comparing symptom profile in women with and without endometriosis. *J Pain Res*  
17 8 2018;11:3181-94.  
18  
19  
20  
21  
22 9 51. Fourquet J, Baez L, Figueroa M, *et al*. Quantification of the impact of endometriosis  
23 10 symptoms on health-related quality of life and work productivity. *Fertil Steril* 2011;96:107-12.  
24  
25  
26  
27 11 52. Sperschneider ML, Hengartner MP, Kohl-Schwartz A, *et al*. Does endometriosis affect  
28 12 professional life? A matched case-control study in switzerland, germany and austria. *BMJ*  
29 13 *open* 2019;9:e019570.  
30  
31  
32  
33  
34 14 53. Prescott J, Farland LV, Tobias DK, *et al*. A prospective cohort study of endometriosis and  
35 15 subsequent risk of infertility. *Hum Reprod* 2016;31:1475-82.  
36  
37  
38  
39 16 54. Geisser ME, Cano A, Leonard MT. Factors associated with marital satisfaction and mood  
40 17 among spouses of persons with chronic back pain. *J Pain* 2005;6:518-25.  
41  
42  
43  
44 18 55. Leonard MT, Cano A. Pain affects spouses too: Personal experience with pain and  
45 19 catastrophizing as correlates of spouse distress. *Pain* 2006;126:139-46.  
46  
47  
48  
49 20 56. Fourquet J, Gao X, Zavala D, *et al*. Patients' report on how endometriosis affects health,  
50 21 work, and daily life. *Fertil Steril* 2010;93:2424-28.  
51  
52  
53  
54  
55  
56  
57  
58  
59  
60

- 1  
2  
3 1 57. Maleki N, Tahaney K, Thompson BL, *et al*. At the intersection of alcohol use disorder and  
4 2 chronic pain. *Neuropsychology* 2019;33:795-807.  
5  
6  
7  
8 3 58. Groenewald CB, Law EF, Fisher E, *et al*. Associations between adolescent chronic pain and  
9 4 prescription opioid misuse in adulthood. *J Pain* 2019;20:28-37.  
10  
11  
12  
13 5 59. Lazzeri L, Orlandini C, Vannuccini S, *et al*. Endometriosis and perceived stress: Impact of  
14 6 surgical and medical treatment. *Gynecol Obstet Invest* 2015;79:229-33.  
15  
16  
17  
18  
19 7  
20  
21  
22  
23  
24  
25  
26  
27  
28  
29  
30  
31  
32  
33  
34  
35  
36  
37  
38  
39  
40  
41  
42  
43  
44  
45  
46  
47  
48  
49  
50  
51  
52  
53  
54  
55  
56  
57  
58  
59  
60



1  
2  
3 1 **FIGURE LEGENDS**  
4  
5

6  
7 2 **Figure 1** Life-course impact of endometriosis. Women were asked to indicate how much they  
8  
9 3 agreed with statements involving the impact of endometriosis on (A) educational and  
10  
11 4 professional achievements, (B) social life and relationships, (C) physical well-being, and (D)  
12  
13 5 overall life course.  
14  
15

16  
17  
18 6 **Figure 2** Experiences and emotions attributed to endometriosis. Respondents were asked to  
19  
20 7 select which experiences related to endometriosis had the most negative impacts on their life  
21  
22 8 potential (A). Women were also asked to indicate which general negative experiences (B) and  
23  
24 9 emotions (C) they had undergone because of endometriosis and what kinds of approaches they  
25  
26 10 had taken to manage the impact of endometriosis (D).  
27  
28  
29

30 11  
31  
32  
33

34 12  
35  
36  
37  
38  
39  
40  
41  
42  
43  
44  
45  
46  
47  
48  
49  
50  
51  
52  
53  
54  
55  
56  
57  
58  
59  
60

FIGURE 1



FIGURE 2

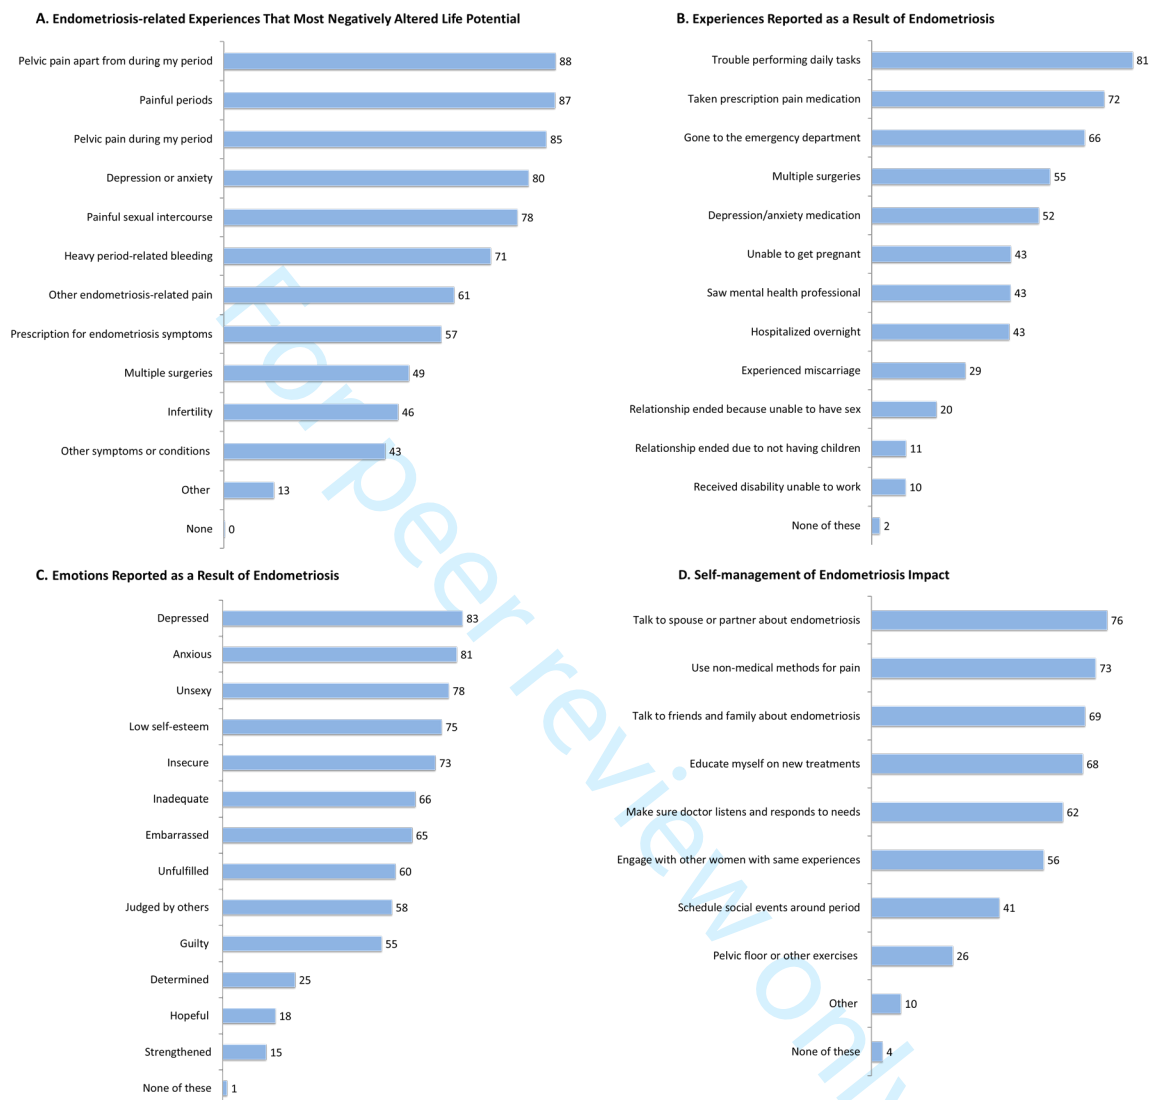

1  
2  
3 **The impact of endometriosis on women's life decisions and goal attainment measured in**  
4 **a cross-sectional survey of members of an online patient community**  
5  
6  
7

8  
9 Stacey A Missmer,<sup>1</sup> Frank F Tu,<sup>2</sup> Ahmed M Soliman,<sup>3</sup> Stephanie E Chiuve,<sup>3</sup> Sarah Cross,<sup>3</sup>  
10  
11 Samantha Eichner,<sup>3</sup> Oscar Antunez Flores,<sup>3</sup> Andrew W Horne,<sup>4</sup> Beth Schneider,<sup>5</sup> Sawsan As-  
12  
13 Sanie<sup>6</sup>  
14  
15

16  
17  
18 <sup>1</sup>Department of Epidemiology, Harvard T. H. Chan School of Public Health; and Boston Center  
19  
20 for Endometriosis, Boston, Massachusetts, USA, and Department of Obstetrics, Gynecology,  
21  
22 and Reproductive Biology, Michigan State University, Grand Rapids, Michigan, USA;

23  
24 <sup>2</sup>Department of Obstetrics and Gynecology, NorthShore University Health System and Pritzker  
25  
26 School of Medicine, University of Chicago, Evanston, Illinois, USA; <sup>3</sup>AbbVie Inc, North Chicago,  
27  
28 Illinois, USA; <sup>4</sup>Medical Research Council Centre for Reproductive Health, University of  
29  
30 Edinburgh, Edinburgh, UK; <sup>5</sup>MyHealthTeams, San Francisco, California, USA; <sup>6</sup>Department of  
31  
32 Obstetrics and Gynecology, University of Michigan, Ann Arbor, Michigan, USA.  
33  
34  
35  
36  
37  
38  
39  
40  
41  
42  
43  
44  
45  
46  
47  
48  
49  
50  
51  
52  
53  
54  
55  
56  
57  
58  
59  
60

## SUPPORTING INFORMATION

**Supporting Information Table 1.** Women indicated how much they agreed or disagreed with the impact of endometriosis on the following: (A) pain, (B) work and education, (C) life experiences altered in a negative way, (D) impact on life, (E) feelings, and (F) management of impact.

**Supporting Information Figure 1.** Impact of endometriosis on educational and professional achievements in the United States (A) and in the rest of the world (B).

**Survey.** MyEndometriosisTeam Survey – Life Course Impact Survey

Supporting Information Table 1.

| <b>S1A</b>                                               | <b>Daily</b> | <b>A few times<br/>a week</b> | <b>A few times<br/>a month</b> | <b>Weekly</b> | <b>Monthly</b> | <b>Every few<br/>months</b> | <b>Never</b> | <b>Once or<br/>twice a<br/>year</b> |
|----------------------------------------------------------|--------------|-------------------------------|--------------------------------|---------------|----------------|-----------------------------|--------------|-------------------------------------|
| <b>Total, n (%)<br/>(N = 743)</b>                        | 415 (55.9)   | 160 (21.5)                    | 78 (10.5)                      | 43 (5.8)      | 31 (4.2)       | 9 (1.2)                     | 4 (0.5)      | 3 (0.4)                             |
| <b>Less positive about future, n (%)<br/>(n = 589)</b>   | 362 (61.5)   | 120 (20.4)                    | 50 (8.5)                       | 31 (5.3)      | 16 (2.7)       | 6 (1.0)                     | 2 (0.3)      | 2 (0.3)                             |
| <b>Remaining respondents<br/>(n = 154)</b>               | 53 (34.4)    | 40 (26.0)                     | 28 (18.2)                      | 12 (7.8)      | 15 (9.7)       | 3 (1.9)                     | 2 (1.3)      | 1 (0.6)                             |
| <b>Did not reach full potential, n (%)<br/>(n = 556)</b> | 341 (61.3)   | 121 (21.8)                    | 44 (7.9)                       | 28 (5.0)      | 13 (2.3)       | 6 (1.1)                     | 2 (0.4)      | 1 (0.2)                             |
| <b>Remaining respondents<br/>(n = 187)</b>               | 74 (39.6)    | 39 (20.9)                     | 15 (8.0)                       | 34 (18.2)     | 18 (9.6)       | 3 (1.6)                     | 2 (1.1)      | 2 (1.1)                             |

  

| <b>S1B</b>                                               | <b>Missed days of<br/>work</b> | <b>Missed school</b> | <b>Earned less<br/>money</b> | <b>Could not<br/>work at<br/>preferred job</b> | <b>Unable to<br/>work full time</b> | <b>Unable to<br/>achieve<br/>educational<br/>goals</b> | <b>Unable to<br/>work part time</b> | <b>Lost a job</b> |
|----------------------------------------------------------|--------------------------------|----------------------|------------------------------|------------------------------------------------|-------------------------------------|--------------------------------------------------------|-------------------------------------|-------------------|
| <b>Total, n (%)<br/>(N = 743)</b>                        | 550 (74.9)                     | 413 (56.3)           | 404 (55.0)                   | 355 (48.4)                                     | 338 (46.0)                          | 290 (39.5)                                             | 226 (30.8)                          | 212 (28.9)        |
| <b>Less positive about future, n (%)<br/>(n = 589)</b>   | 463 (78.6)                     | 343 (58.2)           | 359 (61.0)                   | 316 (53.7)                                     | 300 (50.9)                          | 257 (43.6)                                             | 202 (34.3)                          | 190 (32.3)        |
| <b>Remaining respondents<br/>(n = 154)</b>               | 87 (56.5)                      | 70 (45.5)            | 45 (29.2)                    | 39 (25.3)                                      | 38 (24.7)                           | 33 (21.4)                                              | 24 (15.6)                           | 22 (14.3)         |
| <b>Did not reach full potential, n (%)<br/>(n = 556)</b> | 448 (80.6)                     | 329 (59.2)           | 365 (65.6)                   | 323 (58.1)                                     | 295 (53.1)                          | 261 (46.9)                                             | 205 (36.9)                          | 193 (34.7)        |
| <b>Remaining respondents<br/>(n = 187)</b>               | 102 (54.5)                     | 84 (44.9)            | 39 (20.9)                    | 32 (17.1)                                      | 43 (23.0)                           | 29 (15.5)                                              | 21 (11.2)                           | 19 (10.2)         |

| <b>S1C</b>                                               | Pelvic pain<br>apart from<br>period | Painful<br>periods | Pelvic pain<br>during period | Depression or<br>anxiety | Painful sexual<br>intercourse | Heavy period-<br>related<br>bleeding | Other<br>endometriosi<br>s-related pain | Taken<br>prescription<br>for symptoms | Multiple<br>surgeries | Infertility | Other<br>symptoms or<br>conditions |
|----------------------------------------------------------|-------------------------------------|--------------------|------------------------------|--------------------------|-------------------------------|--------------------------------------|-----------------------------------------|---------------------------------------|-----------------------|-------------|------------------------------------|
| <b>Total, n (%)<br/>(N = 743)</b>                        | 651 (87.6)                          | 650 (87.5)         | 633 (85.2)                   | 598 (80.5)               | 576 (77.5)                    | 524 (70.5)                           | 452 (60.8)                              | 427 (57.5)                            | 363 (48.9)            | 342 (46.0)  | 317 (42.7)                         |
| <b>Less positive about future, n (%)<br/>(n = 589)</b>   | 528 (89.6)                          | 517 (87.8)         | 506 (85.9)                   | 505 (85.7)               | 461 (78.3)                    | 413 (70.1)                           | 382 (64.9)                              | 353 (59.9)                            | 297 (50.4)            | 272 (46.2)  | 268 (45.5)                         |
| <b>Remaining respondents<br/>(n = 154)</b>               | 123 (79.9)                          | 133 (86.4)         | 127 (82.5)                   | 93 (60.4)                | 115 (74.7)                    | 111 (72.1)                           | 70 (45.5)                               | 74 (48.1)                             | 66 (42.9)             | 70 (45.5)   | 49 (31.8)                          |
| <b>Did not reach full potential, n (%)<br/>(n = 556)</b> | 500 (89.9)                          | 491 (88.3)         | 482 (86.7)                   | 476 (85.6)               | 430 (77.3)                    | 400 (71.9)                           | 366 (65.8)                              | 332 (59.7)                            | 284 (51.1)            | 261 (46.9)  | 259 (46.6)                         |
| <b>Remaining respondents<br/>(n = 187)</b>               | 151 (80.7)                          | 159 (85.0)         | 151 (80.7)                   | 122 (65.2)               | 146 (78.1)                    | 124 (66.3)                           | 86 (46.0)                               | 95 (50.8)                             | 79 (42.2)             | 81 (43.3)   | 58 (31.0)                          |

| <b>S1D</b>                                               | Trouble<br>performing<br>daily tasks | Taken Rx<br>pain<br>medication | Gone to ER | Multiple<br>surgeries | Depression/<br>anxiety<br>medication | Unable to<br>get<br>pregnant | Saw mental<br>health<br>professional | Hospitalized<br>overnight | Experienced<br>miscarriage | Relationship<br>ended<br>because<br>unable to<br>have sex |
|----------------------------------------------------------|--------------------------------------|--------------------------------|------------|-----------------------|--------------------------------------|------------------------------|--------------------------------------|---------------------------|----------------------------|-----------------------------------------------------------|
| <b>Total, n (%)<br/>(N = 743)</b>                        | 594 (80.9)                           | 529 (72.1)                     | 485 (66.1) | 406 (55.3)            | 380 (51.8)                           | 317 (43.2)                   | 316 (43.1)                           | 313 (42.6)                | 213 (29.0)                 | 147 (20.0)                                                |
| <b>Less positive about future, n (%)<br/>(n = 589)</b>   | 500 (84.9)                           | 442 (75.0)                     | 406 (68.9) | 333 (56.5)            | 327 (55.5)                           | 251 (42.6)                   | 276 (46.9)                           | 266 (45.2)                | 167 (28.4)                 | 132 (22.4)                                                |
| <b>Remaining respondents<br/>(n = 154)</b>               | 94 (61.0)                            | 87 (56.5)                      | 79 (51.3)  | 73 (47.4)             | 53 (34.4)                            | 66 (42.9)                    | 40 (26.0)                            | 47 (30.5)                 | 46 (29.9)                  | 15 (9.7)                                                  |
| <b>Did not reach full potential, n (%)<br/>(n = 556)</b> | 478 (86.0)                           | 421 (75.7)                     | 390 (70.1) | 311 (55.9)            | 308 (55.4)                           | 239 (43.0)                   | 265 (47.7)                           | 249 (44.8)                | 166 (29.9)                 | 132 (23.7)                                                |
| <b>Remaining respondents<br/>(n = 187)</b>               | 116 (62.0)                           | 108 (57.8)                     | 95 (50.8)  | 95 (50.8)             | 72 (38.5)                            | 78 (41.7)                    | 51 (27.3)                            | 64 (34.2)                 | 47 (25.1)                  | 15 (8.0)                                                  |

| <b>S1E</b>                                               | <b>Depressed</b> | <b>Anxious</b> | <b>Unsexy</b> | <b>Low self-esteem</b> | <b>Insecure</b> | <b>Inadequate</b> | <b>Embarrassed</b> | <b>Unfulfilled</b> | <b>Judged by others</b> | <b>Guilty</b> |
|----------------------------------------------------------|------------------|----------------|---------------|------------------------|-----------------|-------------------|--------------------|--------------------|-------------------------|---------------|
| <b>Total, n (%)<br/>(N = 743)</b>                        | 607 (82.7)       | 592 (80.7)     | 572 (77.9)    | 554 (75.5)             | 538 (73.3)      | 487 (66.3)        | 479 (65.3)         | 437 (59.5)         | 428 (58.3)              | 402 (54.8)    |
| <b>Less positive about future, n (%)<br/>(n = 589)</b>   | 517 (87.8)       | 491 (83.4)     | 468 (79.5)    | 478 (81.2)             | 469 (79.6)      | 421 (71.5)        | 415 (70.5)         | 387 (65.7)         | 380 (64.5)              | 350 (59.4)    |
| <b>Remaining respondents<br/>(n = 154)</b>               | 90 (58.4)        | 101 (65.6)     | 104 (67.5)    | 76 (49.4)              | 69 (44.8)       | 66 (42.9)         | 64 (41.6)          | 50 (32.5)          | 48 (31.2)               | 52 (33.8)     |
| <b>Did not reach full potential, n (%)<br/>(n = 556)</b> | 487 (87.6)       | 462 (83.1)     | 441 (79.3)    | 443 (79.7)             | 434 (78.1)      | 401 (72.1)        | 393 (70.7)         | 375 (67.4)         | 352 (63.3)              | 330 (59.4)    |
| <b>Remaining respondents<br/>(n = 187)</b>               | 120 (64.2)       | 130 (69.5)     | 131 (70.1)    | 111 (59.4)             | 104 (55.6)      | 86 (46.0)         | 86 (46.0)          | 62 (33.2)          | 76 (40.6)               | 72 (38.5)     |

  

| <b>S1F</b>                                               | <b>Talk to spouse or partner</b> | <b>Use non-medical methods for pain</b> | <b>Talk to friends and family</b> | <b>Educate self on treatments</b> | <b>Make doctor listen and respond to needs</b> | <b>Engage with other women with same experiences</b> | <b>Schedule social events around period</b> | <b>Pelvic floor or other exercises</b> | <b>Other</b> | <b>None of these</b> |
|----------------------------------------------------------|----------------------------------|-----------------------------------------|-----------------------------------|-----------------------------------|------------------------------------------------|------------------------------------------------------|---------------------------------------------|----------------------------------------|--------------|----------------------|
| <b>Total, n (%)<br/>(N = 743)</b>                        | 560 (76.3)                       | 533 (72.6)                              | 508 (69.2)                        | 502 (68.4)                        | 455 (62.0)                                     | 409 (55.7)                                           | 304 (41.4)                                  | 193 (26.3)                             | 70 (9.5)     | 26 (3.5)             |
| <b>Less positive about future, n (%)<br/>(n = 589)</b>   | 445 (75.6)                       | 425 (72.2)                              | 409 (69.4)                        | 409 (69.4)                        | 369 (62.6)                                     | 337 (57.2)                                           | 257 (43.6)                                  | 162 (27.5)                             | 61 (10.4)    | 19 (3.2)             |
| <b>Remaining respondents<br/>(n = 154)</b>               | 115 (74.7)                       | 108 (70.1)                              | 99 (64.3)                         | 93 (60.4)                         | 86 (55.8)                                      | 72 (46.8)                                            | 47 (30.5)                                   | 31 (20.1)                              | 9 (5.8)      | 7 (4.5)              |
| <b>Did not reach full potential, n (%)<br/>(n = 556)</b> | 418 (75.2)                       | 405 (72.8)                              | 383 (68.9)                        | 394 (70.9)                        | 345 (62.1)                                     | 325 (58.5)                                           | 246 (44.2)                                  | 153 (27.5)                             | 59 (10.6)    | 20 (3.6)             |
| <b>Remaining respondents<br/>(n = 187)</b>               | 142 (75.9)                       | 128 (68.4)                              | 125 (66.8)                        | 108 (57.8)                        | 110 (58.8)                                     | 84 (44.9)                                            | 58 (31.0)                                   | 40 (21.4)                              | 11 (5.9)     | 6 (3.2)              |



Supporting Information Figure 1.

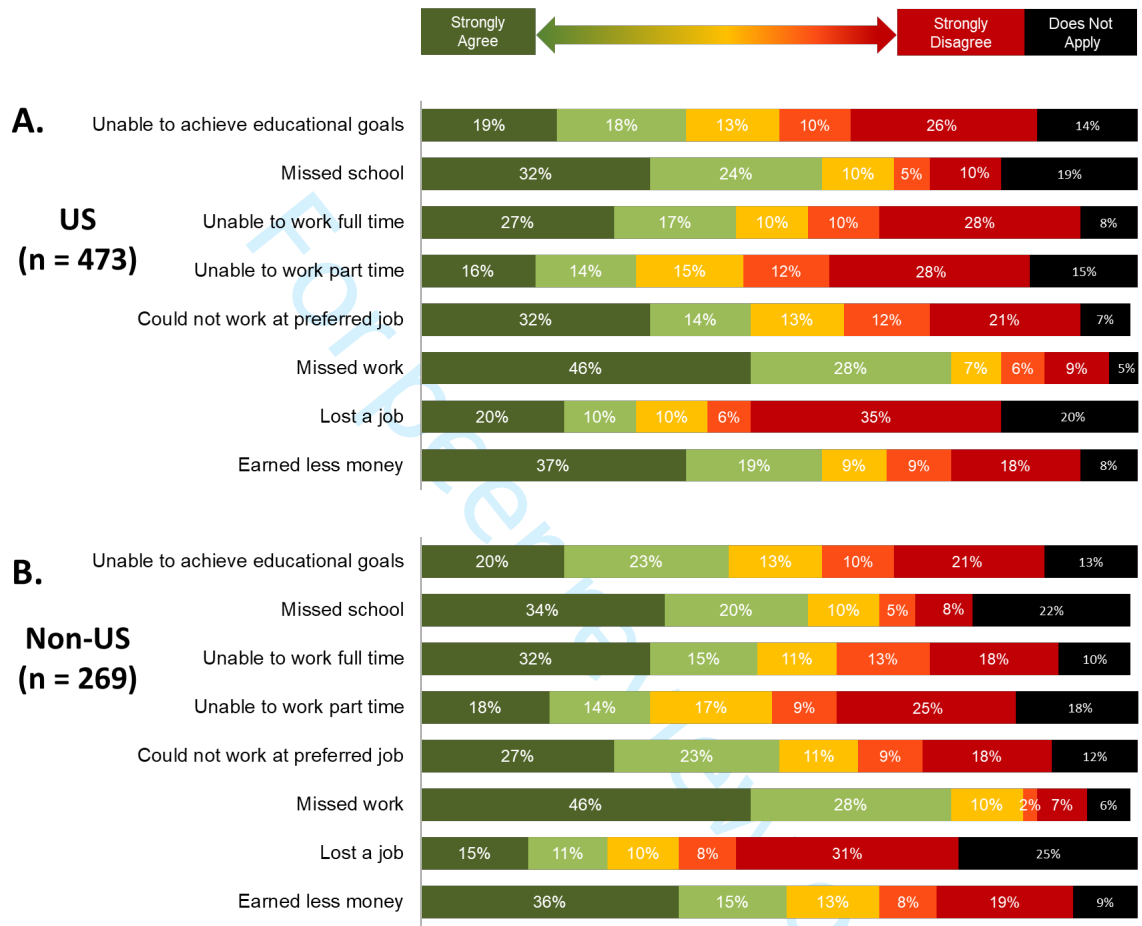

## Survey.

### MyEndometriosisTeam Survey – Life Course Impact Survey

#### Introduction

Part of our mission at MyEndometriosisTeam is to help build awareness and understanding of the impact that endometriosis can have on daily life. Creating a better understanding of what other women with endometriosis go through is important to many members. The aim of this study is to understand real-life experiences of women living with chronic endometriosis. This includes how it may influence life choices and any long-lasting effect it has.

This survey should take approximately 8 minutes to complete. Your participation is completely voluntary, and your responses are anonymous. MyEndometriosisTeam never shares any personally identifying information. Highlights of the findings of this research survey will be shared back with the MyEndometriosisTeam community. We are conducting this survey in collaboration with one of our pharmaceutical partners. This is one of the ways we keep MyEndometriosisTeam free while making sure your voice is heard. If you have any questions regarding the survey, please contact [support@myendometriosisteam.com](mailto:support@myendometriosisteam.com).

If you are 19 years of age or older, live in the United States (excluding Puerto Rico), understand the statements above and freely consent to participate in this research, click on the “Yes, I agree” button to begin the survey.

Yes, I agree

No thanks, I'd rather not participate

#### Section 1: Screening Questions

S1. Which of the following describes you?

Male (**Terminate**)

Female

1  
2  
3 S2. What is your age?  
4

5 Under 19 (**Terminate**)  
6

7 19-29  
8

9 30-39  
10

11 40-49  
12

13 50-59  
14

15 60 or older  
16  
17

18  
19 S3. Which one of the following best describes your condition?  
20

21 Stage 1 endometriosis  
22

23 Stage 2 endometriosis  
24

25 Stage 3 endometriosis  
26

27 Stage 4 endometriosis  
28

29 Not sure what stage of endometriosis I have  
30

31 I do not have endometriosis (**Terminate**)  
32  
33

34 S4. In which country do you currently live?  
35

36 United States (excluding Puerto Rico) (**Continue**)  
37

38 Australia  
39

40 Canada  
41

42 Ireland  
43

44 Netherlands  
45

46 New Zealand  
47

48 South Africa  
49

50 United Kingdom  
51

52 Other  
53  
54  
55  
56  
57  
58  
59  
60

### Section 1: Endometriosis Severity

1. At what age did your endometriosis symptoms begin? (drop-down menu)
2. At approximately what age did you start your first period? (drop-down menu)
3. Thinking about when you first started to experience endometriosis symptoms, approximately how many years did it take before you were diagnosed with endometriosis? (drop-down menu)
4. Did you ever have a surgical procedure, such as a laparoscopy or laparotomy, to confirm you have endometriosis?
  - Yes
  - No
  - Not sure
5. Which one of the following best describes how often you typically feel some type of endometriosis-related pain?
  - Daily
  - A few times a week
  - Weekly
  - A few times a month
  - Monthly
  - Every few months
  - Once or twice a year
  - Never

6. Please rate how severe your endometriosis related pain has been at its worst in the last 12 months using a scale from 0 to 10, where 0=no pain and 10=worst imaginable pain. (Drop down menu).

7. Over the years, has your endometriosis related pain gotten better, gotten worse, or stayed the same?

Gotten much better

Gotten somewhat better

Stayed the same

Gotten somewhat worse

Gotten much worse

## Section 2: Impact on Quality of Life and Life Choices

8. Please indicate how much you agree or disagree with the following statements about the impact endometriosis has had **on your entire life up to now**.

(Rotate order)

### **Because of my endometriosis:**

| (Please select one box for each row)               | Strongly disagree | Some-what Disagr | Neutral | Some-what Agree | Strongly agree | Not Applic-able |
|----------------------------------------------------|-------------------|------------------|---------|-----------------|----------------|-----------------|
| I was unable to achieve my educational goals       | 1                 | 2                | 3       | 4               | 5              | 6               |
| I missed many days of school                       | 1                 | 2                | 3       | 4               | 5              | 6               |
| I was unable to work full time                     | 1                 | 2                | 3       | 4               | 5              | 6               |
| I was unable to work part time                     | 1                 | 2                | 3       | 4               | 5              | 6               |
| I could not work at the job I would have preferred | 1                 | 2                | 3       | 4               | 5              | 6               |

|                                                                     |   |   |   |   |   |   |
|---------------------------------------------------------------------|---|---|---|---|---|---|
| I missed many days of work                                          | 1 | 2 | 3 | 4 | 5 | 6 |
| I lost a job                                                        | 1 | 2 | 3 | 4 | 5 | 6 |
| I earned less money than I could have                               | 1 | 2 | 3 | 4 | 5 | 6 |
| I made fewer friends                                                | 1 | 2 | 3 | 4 | 5 | 6 |
| I have had problems with sexual or intimate relationships           | 1 | 2 | 3 | 4 | 5 | 6 |
| I have not dated or pursued an intimate relationship                | 1 | 2 | 3 | 4 | 5 | 6 |
| I have delayed having or have been unable to have children          | 1 | 2 | 3 | 4 | 5 | 6 |
| I have limited my social activities                                 | 1 | 2 | 3 | 4 | 5 | 6 |
| I have not exercised or played sports as much as I would have liked | 1 | 2 | 3 | 4 | 5 | 6 |
| I do not live where I would like due to my healthcare needs         | 1 | 2 | 3 | 4 | 5 | 6 |
| I lost a lot of time in my life                                     | 1 | 2 | 3 | 4 | 5 | 6 |
| I have travelled less than I would have liked                       | 1 | 2 | 3 | 4 | 5 | 6 |
| I have dressed differently than I would have liked                  | 1 | 2 | 3 | 4 | 5 | 6 |
| I have used alcohol, drugs or smoked cigarettes                     | 1 | 2 | 3 | 4 | 5 | 6 |
| I have not maintained a healthy diet                                | 1 | 2 | 3 | 4 | 5 | 6 |
| I have been less outgoing                                           | 1 | 2 | 3 | 4 | 5 | 6 |
| I have been less positive about the future                          | 1 | 2 | 3 | 4 | 5 | 6 |
| I have not reached my full potential in life                        | 1 | 2 | 3 | 4 | 5 | 6 |

- 1  
2  
3 9. What endometriosis-related experiences, if any, do you think have most contributed to  
4 altering your life potential in a negative way? Select all that apply. (Rotate order)  
5  
6

7 Painful sexual intercourse

8 Pelvic pain during my period

9 Pelvic pain apart from during my period

10 Painful periods

11 Heavy period-related bleeding

12 Other endometriosis related pain

13 Infertility

14 Depression or anxiety

15 Multiple surgeries

16 Prescription treatment to control endometriosis symptoms

17 Other symptoms or conditions (please specify)

18 Other (please specify)

19 None  
20  
21  
22  
23  
24  
25  
26  
27  
28  
29  
30  
31  
32  
33  
34  
35  
36  
37  
38  
39  
40  
41  
42  
43  
44  
45  
46  
47  
48  
49  
50  
51  
52  
53  
54  
55  
56  
57  
58  
59  
60

- 1  
2  
3 10. Which, if any, of these, have you experienced as a result of your endometriosis? Check  
4 all that apply. (Rotate order)  
5  
6

7 Taken prescription medication for the pain (for example, opioids)

8 Taken prescription medication to treat depression or anxiety

9 Had multiple surgical procedures

10 Been hospitalized overnight

11 Gone to the emergency room

12 Received disability income due to being unable to work

13 Had a miscarriage (whether or not it was due to having endometriosis)

14 Had trouble performing daily tasks

15 Saw a mental health professional (eg., psychiatrist, counselor)

16 Was unable to get pregnant

17 Had a relationship end because I was unable to have children

18 Had a relationship end because I was unable to have sex

19 None of these  
20  
21  
22  
23  
24  
25  
26  
27  
28  
29  
30  
31  
32  
33  
34  
35  
36  
37  
38  
39  
40  
41  
42  
43  
44  
45  
46  
47  
48  
49  
50  
51  
52  
53  
54  
55  
56  
57  
58  
59  
60



- 1  
2  
3 11. And which, if any, of these emotions, have you experienced as a result of your  
4 endometriosis? Check all that apply. (Rotate order)  
5  
6

7 **I have felt...**  
8

9 Low self esteem  
10

11 Judged by others  
12

13 Inadequate  
14

15 Unsexy  
16

17 Insecure  
18

19 Guilty  
20

21 Determined  
22

23 Strengthened  
24

25 Hopeful  
26

27 Embarrassed  
28

29 Unfulfilled  
30

31 Depressed  
32

33 Anxious  
34

35 None of these  
36  
37  
38  
39  
40  
41  
42  
43  
44  
45  
46  
47  
48  
49  
50  
51  
52  
53  
54  
55  
56  
57  
58  
59  
60

- 1  
2  
3 12. Which of the following, if any, have you done to help manage the impact of endometriosis?  
4 Select all that apply. (rotate order)  
5

6 Schedule social events around my period  
7

8 Engage with other women going through the same experiences  
9

10 Talk to my friends and family about endometriosis  
11

12 Talk to my spouse or partner about my endometriosis  
13

14 Pelvic floor or other exercises to lessen pain during sex  
15

16 Make sure my doctor listens and responds to my needs  
17

18 Educate myself on new treatments  
19

20 Use non-medical methods for controlling pain (e.g., ice or heat, lubricants during sex)  
21

22 Other (please describe)  
23

24 None of these

- 25 13. Because of endometriosis, is there anything you feel you were unable to accomplish in  
26 your life? (open end)  
27  
28

- 29 14. Is there anything else you would like us to know about the impact endometriosis has had  
30 on your life? (open end)  
31  
32

33 Just a few last questions.  
34  
35  
36

- 37 D1. Which of the following best describes the area where you live?  
38  
39  
40

41 Urban  
42

43 Suburban  
44

45 Rural  
46

47 Not sure / prefer not to say  
48  
49  
50  
51  
52  
53  
54  
55  
56  
57  
58  
59  
60

1  
2  
3 D2. What is the highest level of education you have achieved?  
4  
5  
6

7 Less than high school

8 Some high school

9 High school or equivalent (e. g., GED)

10 Some college, but no degree

11 Associate degree

12 College degree (e.g., B.A., B.S.)

13 Some graduate school, but no degree

14 Graduate school (e.g., M.S., M.D., Ph.D.)

15 Prefer not to answer  
16  
17  
18  
19  
20  
21  
22  
23  
24

25 D3. What is your current employment status?  
26  
27

28 Working full time

29 Working part time

30 Unemployed, not looking for work

31 Unemployed, looking for work

32 Retired

33 Unable to work

34 Prefer not to answer  
35  
36  
37  
38  
39  
40  
41  
42  
43  
44  
45  
46  
47  
48  
49  
50  
51  
52  
53  
54  
55  
56  
57  
58  
59  
60

1  
2  
3 D4. Which of the following best describes your marital status?  
4  
5  
6

7 Single/never married

8 Married

9 Widowed

10 Divorced or separated

11 Prefer not to answer

12  
13  
14  
15  
16  
17  
18 (Skip D5 if “married” or “prefer not to answer” selected in D4)  
19  
20  
21

22 D5. Are you currently in an intimate relationship?  
23  
24  
25

26 Yes

27 No

28 Prefer not to answer  
29  
30  
31  
32

33 D6. How many children, if any, do you have?  
34  
35  
36  
37

38 None

39 1

40 2

41 3

42 4

43 5 or more

44 Prefer not to answer  
45  
46  
47  
48  
49  
50  
51

52 Thank you for answering these questions.  
53  
54  
55  
56  
57  
58  
59  
60

STROBE Statement—Checklist of items that should be included in reports of *cross-sectional studies*

|                           | Item No | Recommendation                                                                                                                                                                                | Location in Manuscript                                                 |
|---------------------------|---------|-----------------------------------------------------------------------------------------------------------------------------------------------------------------------------------------------|------------------------------------------------------------------------|
| <b>Title and abstract</b> | 1       | (a) Indicate the study’s design with a commonly used term in the title or the abstract<br>(b) Provide in the abstract an informative and balanced summary of what was done and what was found | Page 1, lines 1-2<br>Page 3, lines 2-22; page 4, lines 1-5             |
| <b>Introduction</b>       |         |                                                                                                                                                                                               |                                                                        |
| Background/rationale      | 2       | Explain the scientific background and rationale for the investigation being reported                                                                                                          | Page 5, lines 1-23; page 6, lines 1-17                                 |
| Objectives                | 3       | State specific objectives, including any prespecified hypotheses                                                                                                                              | Page 7, lines 1-9                                                      |
| <b>Methods</b>            |         |                                                                                                                                                                                               |                                                                        |
| Study design              | 4       | Present key elements of study design early in the paper                                                                                                                                       | Page 7, lines 18-21; page 8, lines 1-24; page 9, lines 1-19            |
| Setting                   | 5       | Describe the setting, locations, and relevant dates, including periods of recruitment, exposure, follow-up, and data collection                                                               | Page 7, line 12; page 8, lines 1-3 and 23-24; page 9, lines 5-10       |
| Participants              | 6       | (a) Give the eligibility criteria, and the sources and methods of selection of participants                                                                                                   | Page 8, lines 20-24; page 9, lines 1-11                                |
| Variables                 | 7       | Clearly define all outcomes, exposures, predictors, potential confounders, and effect modifiers. Give diagnostic criteria, if applicable                                                      | N/A                                                                    |
| Data sources/ measurement | 8*      | For each variable of interest, give sources of data and details of methods of assessment (measurement). Describe comparability of assessment methods if there is more than one group          | Page 7, line 21; page 8, lines 1-19; supporting information pages 7-17 |
| Bias                      | 9       | Describe any efforts to address potential sources of bias                                                                                                                                     | Page 8, lines 12-13; page 9, lines 10-11                               |
| Study size                | 10      | Explain how the study size was arrived at                                                                                                                                                     | Page 8, lines 23-24; page 9, lines 1-10                                |
| Quantitative variables    | 11      | Explain how quantitative variables were handled in the analyses. If applicable, describe which groupings were chosen and why                                                                  | N/A                                                                    |
| Statistical methods       | 12      | (a) Describe all statistical methods, including those used to control for confounding                                                                                                         | Page 9, lines 12-19                                                    |
|                           |         | (b) Describe any methods used to examine subgroups and interactions                                                                                                                           | Page 9, lines 12-19                                                    |
|                           |         | (c) Explain how missing data were addressed                                                                                                                                                   | Page 8, lines 17-18                                                    |

|                          |     |                                                                                                                                                                                                              |                                                                                    |
|--------------------------|-----|--------------------------------------------------------------------------------------------------------------------------------------------------------------------------------------------------------------|------------------------------------------------------------------------------------|
|                          |     | (d) If applicable, describe analytical methods taking account of sampling strategy                                                                                                                           | N/A                                                                                |
|                          |     | (e) Describe any sensitivity analyses                                                                                                                                                                        | N/A                                                                                |
| <b>Results</b>           |     |                                                                                                                                                                                                              |                                                                                    |
| Participants             | 13* | (a) Report numbers of individuals at each stage of study—eg numbers potentially eligible, examined for eligibility, confirmed eligible, included in the study, completing follow-up, and analysed            | Page 10, lines 3-4                                                                 |
|                          |     | (b) Give reasons for non-participation at each stage                                                                                                                                                         | N/A                                                                                |
|                          |     | (c) Consider use of a flow diagram                                                                                                                                                                           | N/A                                                                                |
| Descriptive data         | 14* | (a) Give characteristics of study participants (eg demographic, clinical, social) and information on exposures and potential confounders                                                                     | Page 11, Table 1                                                                   |
|                          |     | (b) Indicate number of participants with missing data for each variable of interest                                                                                                                          | N/A (no missing data; see page 8, lines 17-18)                                     |
| Outcome data             | 15* | Report numbers of outcome events or summary measures                                                                                                                                                         | Pages 12-14; page 15, lines 1-7; Figures 1-2                                       |
| Main results             | 16  | (a) Give unadjusted estimates and, if applicable, confounder-adjusted estimates and their precision (eg, 95% confidence interval). Make clear which confounders were adjusted for and why they were included | N/A                                                                                |
|                          |     | (b) Report category boundaries when continuous variables were categorized                                                                                                                                    | N/A                                                                                |
|                          |     | (c) If relevant, consider translating estimates of relative risk into absolute risk for a meaningful time period                                                                                             | N/A                                                                                |
| Other analyses           | 17  | Report other analyses done—eg analyses of subgroups and interactions, and sensitivity analyses                                                                                                               | Page 15, lines 8-23; page 16, lines 1-6; supporting information pages 2-6          |
| <b>Discussion</b>        |     |                                                                                                                                                                                                              |                                                                                    |
| Key results              | 18  | Summarise key results with reference to study objectives                                                                                                                                                     | Page 16, lines 9-24; page 17, lines 1-7; page 22, lines 19-24                      |
| Limitations              | 19  | Discuss limitations of the study, taking into account sources of potential bias or imprecision. Discuss both direction and magnitude of any potential bias                                                   | Page 4, lines 14-18; page 21, lines 15-24                                          |
| Interpretation           | 20  | Give a cautious overall interpretation of results considering objectives, limitations, multiplicity of analyses, results from similar studies, and other relevant evidence                                   | Page 16, lines 9-24; pages 17-22                                                   |
| Generalisability         | 21  | Discuss the generalisability (external validity) of the study results                                                                                                                                        | Page 16, lines 16-24; page 19, lines 1-7; page 22, lines 14-17; page 23, lines 1-2 |
| <b>Other information</b> |     |                                                                                                                                                                                                              |                                                                                    |

1  
2  
3  
4  
5  
6  
7  
8  
9  
10  
11  
12  
13  
14  
15  
16  
17  
18  
19  
20  
21  
22  
23  
24  
25  
26  
27  
28  
29  
30  
31  
32  
33  
34  
35  
36  
37  
38  
39  
40  
41  
42  
43  
44  
45  
46

---

|         |    |                                                                                                                                                               |                      |
|---------|----|---------------------------------------------------------------------------------------------------------------------------------------------------------------|----------------------|
| Funding | 22 | Give the source of funding and the role of the funders for the present study and, if applicable, for the original study on which the present article is based | Page 24, lines 11-12 |
|---------|----|---------------------------------------------------------------------------------------------------------------------------------------------------------------|----------------------|

---

\*Give information separately for exposed and unexposed groups.

**Note:** An Explanation and Elaboration article discusses each checklist item and gives methodological background and published examples of transparent reporting. The STROBE checklist is best used in conjunction with this article (freely available on the Web sites of PLoS Medicine at <http://www.plosmedicine.org/>, Annals of Internal Medicine at <http://www.annals.org/>, and Epidemiology at <http://www.epidem.com/>). Information on the STROBE Initiative is available at [www.strobe-statement.org](http://www.strobe-statement.org).

For peer review only

# BMJ Open

## The impact of endometriosis on women's life decisions and goal attainment measured in a cross-sectional survey of members of an online patient community

|                                 |                                                                                                                                                                                                                                                                                                                                                                                                                                                                                                                                                                                                  |
|---------------------------------|--------------------------------------------------------------------------------------------------------------------------------------------------------------------------------------------------------------------------------------------------------------------------------------------------------------------------------------------------------------------------------------------------------------------------------------------------------------------------------------------------------------------------------------------------------------------------------------------------|
| Journal:                        | <i>BMJ Open</i>                                                                                                                                                                                                                                                                                                                                                                                                                                                                                                                                                                                  |
| Manuscript ID                   | bmjopen-2021-052765.R2                                                                                                                                                                                                                                                                                                                                                                                                                                                                                                                                                                           |
| Article Type:                   | Original research                                                                                                                                                                                                                                                                                                                                                                                                                                                                                                                                                                                |
| Date Submitted by the Author:   | 20-Jan-2022                                                                                                                                                                                                                                                                                                                                                                                                                                                                                                                                                                                      |
| Complete List of Authors:       | Missmer, Stacey A.; Michigan State University College of Human Medicine; Harvard University T H Chan School of Public Health<br>Tu, Frank; NorthShore University HealthSystem; University of Chicago Pritzker School of Medicine<br>Soliman, Ahmed M.; AbbVie Inc<br>Chiuve, Stephanie; AbbVie Inc<br>Cross, Sarah; AbbVie Inc<br>Eichner, Samantha; AbbVie Inc<br>Antunez Flores, Oscar; AbbVie Inc<br>Horne, Andrew; The University of Edinburgh MRC Centre for Reproductive Health,<br>Schneider, Beth; MyHealthTeams<br>As-Sanie, Sawsan; University of Michigan, Obstetrics and Gynaecology |
| <b>Primary Subject Heading</b>: | Obstetrics and gynaecology                                                                                                                                                                                                                                                                                                                                                                                                                                                                                                                                                                       |
| Secondary Subject Heading:      | Obstetrics and gynaecology, Qualitative research                                                                                                                                                                                                                                                                                                                                                                                                                                                                                                                                                 |
| Keywords:                       | GYNAECOLOGY, Community gynaecology < GYNAECOLOGY, QUALITATIVE RESEARCH                                                                                                                                                                                                                                                                                                                                                                                                                                                                                                                           |
|                                 |                                                                                                                                                                                                                                                                                                                                                                                                                                                                                                                                                                                                  |

SCHOLARONE™  
Manuscripts





I, the Submitting Author has the right to grant and does grant on behalf of all authors of the Work (as defined in the below author licence), an exclusive licence and/or a non-exclusive licence for contributions from authors who are: i) UK Crown employees; ii) where BMJ has agreed a CC-BY licence shall apply, and/or iii) in accordance with the terms applicable for US Federal Government officers or employees acting as part of their official duties; on a worldwide, perpetual, irrevocable, royalty-free basis to BMJ Publishing Group Ltd ("BMJ") its licensees and where the relevant Journal is co-owned by BMJ to the co-owners of the Journal, to publish the Work in this journal and any other BMJ products and to exploit all rights, as set out in our [licence](#).

The Submitting Author accepts and understands that any supply made under these terms is made by BMJ to the Submitting Author unless you are acting as an employee on behalf of your employer or a postgraduate student of an affiliated institution which is paying any applicable article publishing charge ("APC") for Open Access articles. Where the Submitting Author wishes to make the Work available on an Open Access basis (and intends to pay the relevant APC), the terms of reuse of such Open Access shall be governed by a Creative Commons licence – details of these licences and which [Creative Commons](#) licence will apply to this Work are set out in our licence referred to above.

Other than as permitted in any relevant BMJ Author's Self Archiving Policies, I confirm this Work has not been accepted for publication elsewhere, is not being considered for publication elsewhere and does not duplicate material already published. I confirm all authors consent to publication of this Work and authorise the granting of this licence.

1  
2  
3 1 **The impact of endometriosis on women's life decisions and goal attainment measured in**  
4  
5 2 **a cross-sectional survey of members of an online patient community**  
6  
7

8  
9 3 Stacey A Missmer,<sup>1</sup> Frank F Tu,<sup>2</sup> Ahmed M Soliman,<sup>3</sup> Stephanie E Chiuve,<sup>3</sup> Sarah Cross,<sup>3</sup>  
10  
11 4 Samantha Eichner,<sup>3</sup> Oscar Antunez Flores,<sup>3</sup> Andrew W Horne,<sup>4</sup> Beth Schneider,<sup>5</sup> Sawsan As-  
12  
13 5 Sanie<sup>6</sup>  
14  
15

16  
17  
18 6 <sup>1</sup>Department of Epidemiology, Harvard T. H. Chan School of Public Health; and Boston Center  
19  
20 7 for Endometriosis, Boston, Massachusetts, USA, and Department of Obstetrics, Gynecology,  
21  
22 8 and Reproductive Biology, Michigan State University, Grand Rapids, Michigan, USA;

23  
24 9 <sup>2</sup>Department of Obstetrics and Gynecology, NorthShore University Health System and Pritzker  
25  
26 10 School of Medicine, University of Chicago, Evanston, Illinois, USA; <sup>3</sup>AbbVie Inc, North Chicago,  
27  
28 11 Illinois, USA; <sup>4</sup>Medical Research Council Centre for Reproductive Health, University of  
29  
30 12 Edinburgh, Edinburgh, UK; <sup>5</sup>MyHealthTeams, San Francisco, California, USA; <sup>6</sup>Department of  
31  
32 13 Obstetrics and Gynecology, University of Michigan, Ann Arbor, Michigan, USA.  
33  
34

35  
36 14 **Word Count:** 4506 words  
37  
38

39  
40 15 **Key Words:** Qualitative Research; Gynaecology; Community Gynaecology  
41  
42  
43  
44

45 16  
46  
47  
48

49 17  
50

51 18  
52

53 19  
54

55 20  
56  
57  
58  
59  
60

1  
2  
3 1 **Correspondence to**  
4  
5 2 Dr Stacey A Missmer  
6  
7 3 Professor of Obstetrics, Gynecology, and Reproductive Biology  
8  
9 4 Michigan State University College of Human Medicine  
10  
11 5 15 Michigan Street NE  
12  
13 6 Grand Rapids, MI 49503  
14  
15 7 Phone: 616-234-2705  
16  
17 8 Email: [stacey.missmer@channing.harvard.edu](mailto:stacey.missmer@channing.harvard.edu)  
18  
19  
20  
21  
22  
23  
24  
25  
26  
27  
28  
29  
30  
31  
32  
33  
34  
35  
36  
37  
38  
39  
40  
41  
42  
43  
44  
45  
46  
47  
48  
49  
50  
51  
52  
53  
54  
55  
56  
57  
58  
59  
60

## 1 **ABSTRACT**

2  
3  
4  
5  
6  
7  
8 **Objectives:** To examine women's perceptions of endometriosis-associated disease burden and  
9  
10 its impact on life decisions and goal attainment.

11  
12  
13  
14  
15 **Design:** An anonymous online survey was distributed in October 2018 through the social media  
16  
17 network MyEndometriosisTeam.com.

18  
19  
20  
21  
22 **Participants:** Women aged 19 years and older living in several English-speaking countries who  
23  
24 self-identified as having endometriosis.

25  
26  
27  
28  
29  
30  
31  
32 **Outcome measures:** Patients' perspectives on how endometriosis has affected their work,  
33  
34 education, relationships, overall life decisions, and attainment of goals. Subanalyses were  
35  
36 performed for women who identified as "less positive about the future" (LPAF) or had "not  
37  
38 reached their full potential" (NRFP) due to endometriosis.

39  
40  
41  
42  
43  
44  
45  
46  
47  
48  
49  
50  
51  
52  
53  
54  
55  
56  
57  
58  
59  
60  
**Results:** 743 women completed the survey. Women reported high levels of pain when pain was  
at its worst (mean score, 8.9 on severity scale of 0 [no pain] to 10 [worst imaginable pain]) and  
most (56%, n=415) experienced pain daily. Women reported other negative experiences  
attributed to endometriosis, including emergency department visits (66%, n=485), multiple  
surgeries (55%, n=406), and prescription treatments for symptoms of endometriosis (72%,  
n=529). Women indicated that they believed endometriosis had a negative impact on their  
educational and professional achievements, social lives/relationships, and overall physical  
health. Most women "somewhat agreed"/"strongly agreed" that endometriosis caused them to  
lose time in life (81%, n=601), feel LPAF (80%, n=589), and feel they had NRFP (75%, n=556).  
Women who identified as LPAF or NRFP generally reported more negative experiences than  
those who were non-LPAF or non-NRFP.

1  
2  
3 1 **Conclusions:** Pain and negative experiences related to endometriosis were perceived to  
4  
5 2 negatively impact major life-course decisions and attainment of goals. Greater practitioner  
6  
7 3 awareness of the impact that endometriosis has on a woman's life course and the importance of  
8  
9 4 meaningful dialogue with patients may be important for improving long-term management of the  
10  
11 5 disease and help identify women who are most vulnerable.  
12  
13

14  
15 6 **Abstract Word Count:** 291 (300 word maximum)  
16  
17

18  
19 7 **Strengths and limitations of this study**  
20  
21

- 22 8 • Strength: Quantitative survey with a meaningful sample size and sample population that  
23  
24 9 spanned multiple countries  
25  
26 10 • Strength: Targeted research questions developed based on existing conversations on a  
27  
28 11 social network platform  
29  
30 12 • Strength: Use of social network familiar to patients, facilitating honesty in responses to  
31  
32 13 sensitive topics  
33  
34 14 • Limitation: Possible self-selection bias due to voluntary participation in an online  
35  
36 15 community and no targeted sampling; quantitative data may not be generalizable to all  
37  
38 16 women with endometriosis  
39  
40 17 • Limitation: Self-reported patient responses that were not confirmed by medical records  
41  
42 18 or other complementary data  
43  
44  
45  
46  
47  
48  
49  
50  
51  
52  
53  
54  
55  
56  
57  
58  
59  
60

## 1 BACKGROUND

2 Endometriosis is an often chronic gynecologic disorder that impacts 10% of women of  
3 reproductive age.<sup>1</sup> Endometrial-like tissue thriving outside the uterus leads to local and systemic  
4 inflammation that can result in a wide range of life-impacting effects, including pelvic pain,  
5 dysmenorrhea, dyspareunia, and infertility.<sup>2-4</sup> These debilitating effects have an immense impact  
6 on a patient's quality of life and overall well-being.<sup>5,6</sup> For example, symptoms of endometriosis  
7 may have a negative impact on women's psychological health,<sup>7,8</sup> strain social and intimate  
8 relationships,<sup>5,9-11</sup> and lead to losses in productivity, both at home and in the workplace.<sup>12</sup> These  
9 issues have been further exacerbated by the COVID-19 pandemic, which has led to reduced  
10 access to medical care, delayed treatments, increased stress, loss of work productivity, and  
11 mandated self-isolation.<sup>13,14</sup>

12 Outside the physical and emotional toll, the collective symptoms of endometriosis are also  
13 associated with direct and indirect costs that are burdensome to patients. Visits to physicians  
14 and emergency departments, pharmacy claims, and other direct expenses are estimated to cost  
15 between \$12,000 to \$15,000 per patient per year in the United States, and the loss of work and  
16 productivity may amount to additional losses of thousands of dollars per patient.<sup>12,15-18</sup>

17 Most studies examining chronic diseases like endometriosis focus on one or two specific areas  
18 of the disease, such as its social, physical, or psychological impact at a specific point in  
19 time.<sup>19,20</sup> In contrast, few studies have examined the impact of endometriosis on a woman's life  
20 course (ie, "life-course impairment") based on how symptoms and experiences resulting from  
21 the disease influence major life events and decisions (such as whether to pursue educational  
22 opportunities, choose a career path, establish intimate relationships, and plan for a family) and  
23 the overall ability of patients to attain their life goals.<sup>19,20</sup> The few existing studies have small

1 sample sizes or are qualitative, relying on informational interviews to ascertain the life-course  
2 impact of the disease, but highlight the substantial impacts that endometriosis can have on  
3 social activities, intimate relationships, education, work productivity, and psychological well-  
4 being.<sup>11,21-23</sup> Understanding life-course impairment, as opposed to focusing on the symptoms of  
5 the disease (such as pain or infertility, which are most often addressed individually not  
6 holistically), is vital because of the complicated interrelationship among symptoms and their  
7 downstream effects. Individual symptoms can influence critical life decisions (eg, work,  
8 education, or personal relationships) in ways that are interrelated and can impact other areas of  
9 a patient's life. For example, chronic pain may influence the type and amount of work performed  
10 or whether a patient decides to work at all, which, in turn, can have financial implications on the  
11 patient's lifestyle, family, relationships, or sense of personal fulfillment.<sup>19,20</sup> Symptoms may  
12 determine where a patient chooses to live because of financial considerations, healthcare  
13 access, or proximity to support networks. Similarly, dyspareunia related to endometriosis may  
14 lead some women to avoid intimate relationships, which may have downstream implications for  
15 marriage, family planning, and mental and emotional health.<sup>24,25</sup> Cumulatively, persistent  
16 symptoms of endometriosis and their impact on daily activities and family and intimate  
17 relationships can negatively impact the trajectory of women's lives and are profound and far-  
18 reaching.

1 The objective of this multinational survey was to gain a better understanding of patient  
2 perspectives on how endometriosis impacts their daily activities and identify how the disease  
3 may influence women's major life decisions and attainment of their goals. In addition, we sought  
4 to understand the endometriosis-related life-course impacts specifically in women who reported  
5 low optimism or low goal attainment by investigating the specific reasons for life-course  
6 impairment among the subset of women who felt their lives were most negatively impacted by  
7 endometriosis. Insights into a patient's complete experience with endometriosis are needed to  
8 develop and provide access to effective treatments to reduce the negative impacts of  
9 endometriosis on a woman's life course. Greater awareness of the potential negative life-course  
10 impacts of endometriosis is important for helping physicians to identify and understand patients'  
11 needs and improve the long-term management of endometriosis.

## 12 **METHODS**

### 13 **Ethics approval**

14 The Advarra Institutional Review Board (Columbia, MD, USA) reviewed the cross-sectional  
15 survey for participants in the United States and determined that informed consent was not  
16 required (exempt determination #Pro00029982, 26 September 2018). However, participants did  
17 consent to participate in a survey and email invitations were provided to people who opted to  
18 receive communications.

### 19 **Survey development**

20 An online survey was created in a collaborative effort between AbbVie (North Chicago, IL, USA)  
21 and MyHealthTeams (San Francisco, CA, USA), a company that creates social networks for



1  
2  
3 1 communities of individuals living with chronic conditions to foster discussion and provide support  
4  
5 2 among people facing similar circumstances. The survey was programmed and administered  
6  
7 3 through Qualtrics, an online survey tool that allows users to capture survey responses in an  
8  
9 4 anonymized manner. The survey was provided in English and was available online on the social  
10  
11 5 media network website MyEndometriosisTeam.com from October 3 through October 25, 2018.  
12  
13 6 The 14 survey questions about women's experiences with endometriosis were based on our  
14  
15 7 knowledge about the disease state, existing publications, and online conversations participants  
16  
17 8 were having (**see Patient and public involvement** for further detail). In addition, the survey  
18  
19 9 contained 4 screening questions and 6 demographic questions (identified as Supporting  
20  
21 10 Information). The primary goal of the survey was to capture patients' perspectives on the  
22  
23 11 negative impacts of endometriosis on different aspects of their life courses, including how  
24  
25 12 endometriosis has affected their work, education, relationships, overall life decisions, and  
26  
27 13 attainment of goals. This portion of the survey was modeled after a validated instrument created  
28  
29 14 to measure life-course impact of disease in patients with psoriasis.<sup>25</sup> This tool was used as a  
30  
31 15 starting point for model development as it has been validated for another chronic disease with  
32  
33 16 excess psychological and psychosocial burden, has been used clinically, and was published in  
34  
35 17 the scientific literature. Survey questions were rotated to avoid any bias introduced by order of  
36  
37 18 answer selections. Most survey questions were closed-ended and provided multiple-choice  
38  
39 19 options to participants; two questions were open-ended and allowed participants to provide  
40  
41 20 written responses detailing any life accomplishments they believed were impeded by  
42  
43 21 endometriosis or to offer anything else they wanted to share about the impact of endometriosis  
44  
45 22 on their lives. Responses were required for all closed-ended questions; therefore, no  
46  
47 23 imputations for missing data were required. The survey used in this study is included in the  
48  
49 24 supplementary material.  
50  
51  
52  
53  
54  
55

## 56 **Patient and public involvement**

57  
58  
59  
60

1 Survey questions were developed based on reviewing conversations members were having on  
2 MyEndometriosisTeam.com to ensure both relevance of topics and patient-focused language.  
3 The social media network, MyEndometriosisTeam.com, was developed for women living with  
4 endometriosis and consists of more than 108,000 members across 13 countries. Based on  
5 institutional review board exemption requirements, people were asked at the beginning of the  
6 survey if they agreed to participate, and email invitations were sent only to those people who  
7 opted into receiving communications.

## 8 **Participant eligibility and recruitment**

9 Members of the social network MyEndometriosisTeam.com were recruited through 33,000 email  
10 invitations. Invitations posted on the public Facebook page for MyEndometriosisTeam recruited  
11 additional women to participate in the survey, which was live on the MyEndometriosisTeam.com  
12 website from October 3 to October 25, 2018. The English-language survey was conducted  
13 among an international population of women who were at least 19 years of age and who self-  
14 identified as having endometriosis. The survey was anonymous and answers could not be  
15 linked to individual members.

## 16 **Survey analysis**

17 Descriptive statistics were used to tabulate survey responses in this cross-sectional study. After  
18 descriptive statistics were quantified for all respondents, a subanalysis was performed that  
19 restricted the survey responder population to women who “somewhat agreed” or “strongly  
20 agreed” that they were “less positive about the future” (LPAF) or that they “had not reached their  
21 full potential” (NRFP) because of endometriosis. These two questions were selected for this  
22 subanalysis to focus on the life-course impact attributed to endometriosis as identified by those

**Table 1** Demographics and burden of endometriosis

| Characteristic | Overall Respondents, n (%) | LPAF Respondents, n (%) | NRFP Respondents, n (%) |
|----------------|----------------------------|-------------------------|-------------------------|
|----------------|----------------------------|-------------------------|-------------------------|

1 who reported low optimism or low goal attainment. For this analysis, life-course impairment was  
 2 defined as respondents who “somewhat agreed” or “strongly agreed” that endometriosis had  
 3 negatively impacted their education, employment, relationships, social activities, and physical  
 4 and emotional well-being.

## 5 RESULTS

### 6 Survey response and demographics

7 A total of 743 women completed the survey (table 1), which was live from October 3 to October  
 8 25, 2018.

9 Among respondents to the English-language survey, 474 (64%) were from the United States,  
 10 and 269 (36%) were from other countries, including one-fifth from the United Kingdom (17%,  
 11 n=128), and one-fifth summed from Canada, Australia, South Africa, Ireland, New Zealand, and  
 12 The Netherlands (table 1). Most women (73%, n=542) were younger than 40 years of age.  
 13 Almost half of the respondents (48%, n=355) were unaware of their stage of endometriosis  
 14 (according to the rASRM scoring system), which was obtained at their most recent surgery.  
 15 Among the 52% of respondents who recalled their rASRM score, most (57%, n=223) reported  
 16 having stage 4 endometriosis (table 1). Baseline demographics were generally comparable  
 17 between the overall study population and women who identified as LFAP or NRFP (table 1).

|                                                     | (N=743)  | (N=589)  | (N=556)  |
|-----------------------------------------------------|----------|----------|----------|
| <b>Age at time of survey, years</b>                 |          |          |          |
| 19–29                                               | 206 (28) | 179 (30) | 155 (28) |
| 30–39                                               | 339 (46) | 269 (46) | 259 (47) |
| 40–49                                               | 180 (24) | 128 (22) | 129 (23) |
| 50 or older                                         | 18 (2)   | 13 (2)   | 13 (2)   |
| <b>Country</b>                                      |          |          |          |
| United States (excluding Puerto Rico <sup>a</sup> ) | 474 (64) | 370 (63) | 364 (65) |
| United Kingdom                                      | 128 (17) | 102 (17) | 92 (17)  |
| Canada                                              | 38 (5)   | 32 (5)   | 30 (5)   |
| Australia                                           | 37 (5)   | 31 (5)   | 27 (5)   |
| South Africa                                        | 20 (3)   | 15 (3)   | 9 (2)    |
| Ireland                                             | 17 (2)   | 15 (3)   | 12 (2)   |
| Other                                               | 15 (2)   | 12 (2)   | 13 (2)   |
| New Zealand                                         | 11 (1)   | 9 (2)    | 8 (1)    |
| The Netherlands                                     | 3 (0.4)  | 3 (1)    | 1 (<0.1) |
| <b>Level of education</b>                           |          |          |          |
| Some high school or less                            | 33 (4)   | 21 (4)   | 20 (4)   |
| High school diploma                                 | 111 (15) | 80 (14)  | 76 (14)  |
| Some college                                        | 214 (29) | 164 (28) | 176 (32) |
| College degree                                      | 254 (34) | 129 (22) | 113 (20) |
| Graduate school/degree                              | 111 (15) | 59 (10)  | 50 (9)   |
| Prefer not to answer                                | 20 (3)   | 15 (3)   | 10 (2)   |
| <b>Endometriosis stage</b>                          |          |          |          |
| Stage 1                                             | 33 (4)   | 24 (4)   | 22 (4)   |
| Stage 2                                             | 39 (5)   | 28 (5)   | 29 (5)   |
| Stage 3                                             | 93 (13)  | 70 (12)  | 73 (13)  |
| Stage 4                                             | 223 (30) | 191 (32) | 171 (31) |
| Not sure                                            | 355 (48) | 276 (47) | 261 (47) |
| <b>Method of diagnosis</b>                          |          |          |          |
| Laparoscopic surgery                                | 650 (87) | 518 (88) | 494 (89) |
| Clinical only                                       | 87 (12)  | 66 (11)  | 57 (10)  |
| Not sure                                            | 6 (0.8)  | 5 (1)    | 5 (1)    |

<sup>a</sup>Patients from Puerto Rico were separated from the United States population into the “other” category due to IRB exemption qualifications that were different for residents of Puerto Rico versus residents of the 50 states of the United States.

## 1 **Diagnosis and symptoms**

### 2 *Diagnosis*

3 Women began experiencing symptoms of endometriosis at a young age, with many  
4 experiencing symptoms by age 15. Most women (74%, n=549) reported having a diagnosis of  
5 endometriosis made more than 3 years after the appearance of symptoms (average delay of  
6 approximately 9 years). Nearly half of women (42%, n=313) said it took 10 years or longer after  
7 the initial onset of their symptoms to receive a surgical or clinical diagnosis of endometriosis.  
8 The younger the woman's age at symptom onset, the longer the delay; it took, on average, 13  
9 years to reach a surgical diagnosis for women who began experiencing symptoms by age 13.  
10 Most women (87%, n=650) reported their diagnosis had been confirmed by laparoscopy  
11 (table 1).

### 12 *Endometriosis-associated pain*

13 Most women (56%, n=415) reported experiencing pain daily and nearly an additional one-  
14 quarter of them reported feeling endometriosis-associated pain a few times per week. When  
15 asked to rate how severe their pain was in the last 12 months on a scale from 0 (no pain) to 10  
16 (worst imaginable pain), more than half of the respondents (54%) rated their worst pain within  
17 the last 12 months as a 9 or 10. About two-thirds of women reported their endometriosis-  
18 associated pain had worsened over the years when asked if endometriosis-related pain had  
19 gotten better, worse, or stayed the same.

## 20 **Life-course impairment**

### 21 *Education and employment potential*

1 Many of the women surveyed said they “somewhat agreed” or “strongly agreed” that they had  
2 experienced difficulties achieving their educational goals (40%, n=290) or had missed school  
3 (55%, n=413) because of endometriosis-associated symptoms (figure 1A). Almost half of  
4 participants (45%, n=338) “somewhat agreed” or “strongly agreed” that they could not work full  
5 time, and a similar percentage (47%, n=355) reported not working at a job they would have  
6 preferred. Most reported that they had missed work (74%, n=550) or earned less money than  
7 they could have (54%, n=404) because of endometriosis-associated symptoms. These findings  
8 were consistent among patients in the United States compared with the rest of the world  
9 (supporting information figure 1).

#### 10 *Relationships and social engagements*

11 Most women “somewhat agreed” or “strongly agreed” that endometriosis-associated symptoms  
12 led to problems in their intimate relationships (83%, n=613) and/or created a barrier to starting a  
13 family (58%, n=431). Most women similarly believed that endometriosis-associated symptoms  
14 had led them to limit their social activities (82%, n=609), made them less outgoing (81%,  
15 n=602), and caused them to travel less (59%, n=434) (figure 1B).

#### 16 *Physical well-being*

17 Most women “somewhat agreed” or “strongly agreed” endometriosis limited their ability to stay  
18 active (79%, n=588) and maintain a healthy diet (55%, n=406) (figure 1C). A high proportion of  
19 women (43%, n=323) perceived that endometriosis-associated symptoms resulted in use of  
20 alcohol, drugs, or cigarettes.

#### 21 *Life-course impairment overall*

1  
2  
3 1 Overall, most women (80%, n=601) “somewhat agreed” or “strongly agreed” endometriosis-  
4 associated symptoms had caused them to lose time from their daily lives (figure 1D). A similar  
5  
6 2 associated symptoms had caused them to lose time from their daily lives (figure 1D). A similar  
7  
8 3 number of women reported that they were less positive about the future because of their  
9  
10 4 endometriosis-associated symptoms (80%, n=589), and 75% (n=556) “somewhat agreed” or  
11  
12 5 “strongly agreed” that endometriosis-associated symptoms had kept them from reaching their  
13  
14 6 full potential in life.

### 7 **Experiences and emotions associated with endometriosis**

8 Women reported that numerous experiences attributed to endometriosis had altered their life  
9 potential in a negative way (figure 2A) or negatively impacted their lives in other ways  
10 (figure 2B). The most frequent responses were common symptoms of endometriosis, including  
11 pelvic pain apart from menstruation, painful menstruation, pelvic pain during menstruation, and  
12 painful sexual intercourse.

13 Most women surveyed reported that endometriosis impacted their ability to perform daily tasks  
14 (81%, n=594); however, many of the negative experiences attributed to endometriosis were  
15 related to the use of healthcare services and treatments. For example, women reported taking  
16 prescription pain medications (72%, n=529), visiting emergency departments (66%, n=485),  
17 having multiple surgeries (55%, n=406), being hospitalized overnight (43%, n=313), taking  
18 prescription medication for depression or anxiety (52%, n=380), or seeing a mental health  
19 professional because of their endometriosis-associated symptoms (43%, n=316). Around half of  
20 the women surveyed reported that the experiences that most negatively impacted their lives  
21 were their need to take prescription medication (57%, n=427) and the multiple surgeries for  
22 endometriosis (49%, n=363). In addition, most women surveyed reported several negative  
23 emotions that they attributed to endometriosis, including feeling depressed (83%, n=607),

1  
2  
3 1 anxious (81%, n=592), unsexy (78%, n=572), or having low self-esteem (75%, n=554; figure  
4 2C).

5  
6  
7  
8  
9 3 Women managed the impact of their endometriosis in different ways (figure 2D). Most  
10 4 commonly, this included talking to a spouse or partner about their condition, using non-medical  
11 5 strategies (such as diet or exercise) to control their pain, and seeking support from friends and  
12 6 family.

13  
14  
15  
16  
17  
18  
19 7 **Additional analysis of women who believed their future and life potential were more**  
20 8 **impacted by endometriosis**

21  
22  
23  
24  
25 9 Most of the sample included women who “somewhat agreed” or “strongly agreed” that they were  
26 10 LPAF (80%; n=589) or had NRFP in life (75%; n=556) because of endometriosis, and several  
27 11 questions limited to these women were further analyzed (Supporting Information table 1).  
28  
29 12 Overall, the observational data in this study suggested women who believed they were LPAF or  
30 13 had NRFP generally reported more negative experiences than the fewer respondents who did  
31 14 not indicate they were LPAF (non-LPAF, 21%; n=154) or had NRFP (non-NRFP, 25%; n=187).  
32  
33 15 Daily pain was reported by 62% of women who believed they were LPAF and 61% of women  
34 16 who had NRFP because of endometriosis (34% non-LPAF and 40% non-NRFP; Supporting  
35 17 Information table 1A). Women who believed they were LPAF or had NRFP also reported  
36 18 negative experiences related to education and work they attributed to endometriosis, including  
37 19 having earned less money (61% LPAF, 29% non-LPAF, 66% NRFP, and 21% non-NRFP), not  
38 20 working a preferred job (54% LPAF, 25% non-LPAF, 58% NRFP, 17% non-NRFP), or not  
39 21 achieving educational goals (44% LPAF, 21% non-LPAF, 47% NRFP, 16% non-NRFP)  
40  
41 22 (Supporting Information table 1B). Most women who believed their future and life potential were  
42 23 more impacted by their disease reported endometriosis-related experiences altered their life



1  
2  
3 1 potential in a negative way (Supporting Information table 1C). Similarly, many of these women  
4  
5 2 reported negative experiences and emotions they attributed to endometriosis (Supporting  
6  
7 3 Information table 1D, E). All women used similar strategies to cope with and mitigate the impact  
8  
9 4 of endometriosis on their lives (Supporting Information table 1F).  
10  
11  
12 5

## 13 6 **DISCUSSION**

14  
15  
16  
17  
18 7 This survey found that women with endometriosis who self-reported pronounced symptoms  
19  
20 8 reported experiences that negatively impacted their perspective of the future and overall life  
21  
22 9 potential. For many women, endometriosis-associated symptoms negatively affect various  
23  
24 10 areas of their lives, including education and employment, relationships and social engagements,  
25  
26 11 and physical well-being. Participants indicated that adverse experiences related to management  
27  
28 12 of their disease and its impact on everyday life also believed that their future and life potential  
29  
30 13 were negatively impacted by endometriosis.  
31  
32  
33

### 34 14 **Study implications**

35  
36  
37  
38 15 The severity of pain reported by women who completed the online survey indicates that  
39  
40 16 respondents in our study may have had a greater symptom burden than did women participating  
41  
42 17 in previous studies using similar pain scales.<sup>26-28</sup> Women in our study also reported slightly  
43  
44 18 lengthier delays in diagnosis after the onset of their first symptoms. Findings in previous studies  
45  
46 19 have illustrated that delays are common in diagnosing endometriosis.<sup>15,29-37</sup> Although some  
47  
48 20 recent literature suggests that the delay in diagnosis may be slowly improving,<sup>35</sup> the use of non-  
49  
50 21 invasive and accurate diagnostic tools could improve diagnosis times and reduce women's pain  
51  
52 22 and distress.<sup>37,38</sup> The delays in diagnosis reported by our study participants and others indicate  
53  
54  
55  
56  
57  
58  
59  
60

1 many women experiencing troublesome symptoms of endometriosis may still wait extended  
2 periods before receiving a definitive diagnosis and initiating treatment.

3 The higher pain burden and longer diagnostic delay reported in our sample, which may include  
4 higher numbers of women who sought social network support because they were more  
5 frustrated with their disease experience, could conceivably be due in part to their longer  
6 struggles with more challenging symptoms than would be observed in the general population of  
7 women with diagnosed endometriosis. Results from a recent study using the same social  
8 network to recruit participants found that the majority of respondents rated their worst pain  
9 higher than 7 on a 10-point scale, only a little lower than the pain rating given by the women in  
10 our study.<sup>39</sup> Additionally, the previous study participants also experienced a diagnostic delay,  
11 supporting the theory that recruitment from this member-centered network may draw more  
12 women who have struggled longer with their disease.<sup>39</sup> Interestingly, overall trends in diagnostic  
13 delays observed between age groups in our study are consistent with reports in previous  
14 research, ie, women whose symptom onset occurred at a younger age experienced longer  
15 times to diagnosis.<sup>15,31,35</sup>

16 Many respondents said they missed school and were generally unable to achieve their  
17 educational goals because of endometriosis. There is a dearth of research on the impact of  
18 endometriosis on women's educational aspirations and their ability to achieve goals due to  
19 endometriosis-associated symptoms, compared with the impact endometriosis has on  
20 professional work or other areas of life.<sup>9</sup> Findings from some existing studies suggest  
21 endometriosis-associated symptoms may impact grades, attendance, or completion of  
22 educational programs.<sup>21,22,40</sup> Although informative, these studies were more qualitative in nature  
23 and involved small sample sizes.<sup>21,22,40</sup> A quantitative study examining the lives of 78 women  
24 15 years after receiving a verified diagnosis of endometriosis found only a fraction of women

1 reported that their disease had a negative impact on their education.<sup>11</sup> However, the women  
2 included in that study seemed to report less frequent pain and endometriosis-related effects, like  
3 depression, compared with the reports made by women in our study. Furthermore, the small  
4 sample was collected at a single Norwegian hospital and the findings may not be representative  
5 of women's experiences with endometriosis on a wider scale.<sup>11</sup> Regardless, any impact on  
6 education is concerning, and our study results emphasize the need for additional research into  
7 this overlooked area in women with endometriosis. Research on other medical conditions, like  
8 adolescent fibromyalgia, supports that chronic pain can negatively impact education, reinforcing  
9 the likelihood that endometriosis may have a similar impact.<sup>41,42</sup>

10 Respondents in the current study also reported endometriosis-associated symptoms caused  
11 them to miss work, earn less money, prevented them from a job they would have preferred, or  
12 impeded their working full time or part time. Many health conditions that can occur with  
13 endometriosis can impact work productivity and potential, including depression, other chronic  
14 pain conditions or disorders, and digestive disorders.<sup>43</sup> Endometriosis was self-reported by  
15 respondents in this study, and it is possible that other chronic conditions (particularly, chronic  
16 overlapping pain conditions) may also contribute to women's perceived interference with  
17 productivity and employment opportunities. Indeed, more than half of women with symptomatic  
18 endometriosis can present with comorbid pain syndromes,<sup>44</sup> and these may include conditions  
19 associated with pelvic pain, like dysmenorrhea, irritable bowel syndrome, or painful bladder  
20 syndrome.<sup>45,46</sup> Findings from previous studies have also illustrated that endometriosis-  
21 associated symptoms may lead to losses in productivity both at home and in the workplace,  
22 potentially impacting professional achievement.<sup>12,34,47,48</sup> In our study, most women who indicated  
23 that they were LPAF or had NRFP because of endometriosis reported painful symptoms and  
24 negative experiences. Also, women who were LPAF or had NRFP often believed it was harder  
25 to perform daily tasks because of their disease.

1  
2  
3 1 Our results further support that endometriosis symptoms are disruptive and may lead to loss of  
4  
5 2 productivity, ultimately influencing women's major life decisions or consequences, including  
6  
7 3 whether to work at reduced capacity or pursue preferred jobs. Results from a recent multicenter  
8  
9 4 study of women with confirmed endometriosis and a matched comparison group found the  
10  
11 5 disease forced some women to seek work outside desired professions, which, in turn, resulted  
12  
13 6 in health-related limitations in career choices.<sup>48</sup> These collective findings are concerning  
14  
15 7 because satisfaction in a chosen profession—or, at a minimum, the options available to make  
16  
17 8 life decisions regarding one's profession—is an important component of an overall satisfying  
18  
19 9 quality of life, and the decision to work less or pursue a less desirable job may have  
20  
21 10 downstream implications for women's finances, relationships, social lives, or travel  
22  
23  
24 11 decisions.<sup>19,48</sup>

25  
26  
27  
28 12 Respondents to our survey reported endometriosis had a negative impact on their relationships,  
29  
30 13 social engagements, and ability to have children (when desired), which is consistent with  
31  
32 14 findings from a host of previous studies that demonstrated the negative impacts of  
33  
34 15 endometriosis on social well-being and health-related quality of life.<sup>9,12,34,47</sup> Interestingly, 46% of  
35  
36 16 women in our study reported experiencing infertility, which is slightly higher than the 14%–40%  
37  
38 17 range reported in previous studies, again hinting at our population's higher symptom  
39  
40 18 burden.<sup>34,39,49</sup> Other chronic pain conditions have also impacted these life-course components,  
41  
42 19 including conditions related to musculoskeletal pain and chronic back pain.<sup>50,51</sup>

43  
44  
45  
46 20 Similar to decisions involving education and professional achievement, life choices involving the  
47  
48 21 pursuit of intimate relationships or starting a family may have downstream implications in other  
49  
50 22 areas, like finance, psychological well-being, or employment, which may have their own  
51  
52 23 downstream impacts on additional aspects of a person's life course.<sup>19</sup> Likewise, women  
53  
54 24 frequently reported not being physically active and having poorer diets because of their disease.

1  
2  
3 1 Although few studies have examined this aspect of endometriosis, findings from two smaller  
4  
5 2 studies have suggested that pain associated with the disease may also have a negative impact  
6  
7 3 on exercise and nutrition.<sup>9,30,52</sup>  
8  
9

10  
11 4 Of particular concern was the view of many women that their disease made them increase their  
12  
13 5 use of alcohol, drugs, or cigarettes. Research into whether pain and experiences related to  
14  
15 6 endometriosis may be associated with higher rates of substance abuse is severely lacking.  
16  
17 7 However, there are demonstrated associations between other chronic pain conditions and  
18  
19 8 substance abuse that support our finding.<sup>53,54</sup> The results from our study draw attention to this  
20  
21 9 issue and highlight substance abuse as an important avenue for additional investigation.  
22  
23  
24  
25

26 10 The findings from our study indicate that women with endometriosis may experience many  
27  
28 11 healthcare-related side effects. Of particular concern, patients noted that treatments meant to  
29  
30 12 help reduce the burden of endometriosis may have their own negative impact. Many women  
31  
32 13 perceived that use of prescription medications and multiple surgeries to control the symptoms of  
33  
34 14 endometriosis had a negative impact on their life potential, and this response was also observed  
35  
36 15 in women who indicated they were LPAF or believed they had NRFP due to their disease.  
37  
38 16 Results from one recent study showed that medical treatment for a condition may increase a  
39  
40 17 patient's stress levels and potentially affect their psychological health.<sup>55</sup> Patients who were  
41  
42 18 taking prescription medications and who experienced more challenging adverse effects from  
43  
44 19 their therapies had higher perceived stress levels, and women undergoing multiple surgeries  
45  
46 20 were especially impacted. These reports underscore the potential value of supportive  
47  
48 21 psychological care for patients with endometriosis as part of effective long-term disease  
49  
50 22 management.  
51  
52  
53  
54  
55  
56  
57  
58  
59  
60

1  
2  
3 1 In general, women experienced a range of consequences that they attributed to living with and  
4  
5 2 managing the limitations imposed by endometriosis. In addition to pain, women reported that the  
6  
7 3 endometriosis-related experiences that most impacted their lives in a negative way included  
8  
9 4 depression or anxiety (80%), heavy menstrual bleeding (71%), the need to take prescription  
10  
11 5 treatments (57%) or undergo multiple surgeries (49%), or infertility (46%). In other studies,  
12  
13 6 women have reported not feeling “normal” or feminine, experiencing a range of negative  
14  
15 7 emotions (eg, anger, depression, hopelessness, disappointment, and exhaustion), having  
16  
17 8 limited physical or sexual activity, struggling to find appropriate treatments, feeling guilt over  
18  
19 9 disrupted relationships, and suffering in silence due to endometriosis-related  
20  
21 10 symptoms.<sup>22,23</sup> While each woman experienced the impact of endometriosis differently, the  
22  
23 11 majority believed that they were living life less fully than they could have because of their  
24  
25 12 endometriosis-associated symptoms. This belief was informed by the symptoms and healthcare  
26  
27 13 requirements they faced, and, in turn, may have influenced major life decisions that could have  
28  
29 14 their own deleterious effects on personal fulfillment and life potential. The interconnectedness of  
30  
31 15 effects triggered by major life decisions highlights the importance of conducting further research  
32  
33 16 into the cumulative burden of debilitating diseases like endometriosis within the context of an  
34  
35 17 individual’s life course.

## 18 **Strengths and limitations**

19 Limitations of this study include the selection of participants from an online community with  
20  
21 20 voluntary participation, no targeted sampling, and no way to calculate a response rate. The  
22  
23 21 participants were generally well educated, had access to health care, and participated in an  
24  
25 22 online social network. Data on race, ethnicity, or socioeconomic status were not collected.  
26  
27 23 Patients who experienced the most significant psychosocial impacts of endometriosis or lacked  
28  
29 24 the resources to access the online community may not have been represented in the sample

1 population, whereas the patients who were most affected by severe pelvic pain may have been  
2 more likely to participate in the study. These factors may have led to self-selection bias;  
3 therefore, the results of this study may not be generalizable to the overall population of patients  
4 with endometriosis. Any between-group comparisons are observational in nature and no  
5 definitive conclusions can be made in the absence of formal statistical analysis.

## 6 **Future implications**

7 Examining the cumulative life-course impact of endometriosis may influence a physician's ability  
8 to understand a woman's complete experience with the disease, help identify patients who are  
9 most vulnerable to its impacts, and inform options for management.<sup>9,20,22,56</sup> A fuller  
10 understanding of the life-course impact of endometriosis may also elucidate patterns of patient  
11 needs and identify which forms of supportive multidisciplinary care are necessary, including the  
12 need for early referral to specialists and other professionals who provide complementary  
13 healthcare. These needs are likely to change over time, during the different phases of each  
14 patient's life. For example, teams that include gynecologists and pain specialists may help  
15 patients manage endometriosis-associated pain symptoms; reproductive endocrinologists may  
16 help manage infertility, if this occurs; sexual health counselors may collaborate with patients  
17 who have dyspareunia; and counselors/psychologists may assist with chronic stress and mental  
18 health issues.<sup>57</sup> Physicians who are responsive to patients' individual needs and values can  
19 positively support overall quality of life in those patients who experience infertility<sup>58,59</sup> and other  
20 negative symptoms of endometriosis, such as chronic abdominal pain, dysmenorrhea, and  
21 dyspareunia.<sup>24</sup> Endometriosis may also contribute to social inequalities; further research is  
22 needed to explore this topic and develop social policies to address these inequalities.

**1 Conclusion**

2 Our international study of the impact of endometriosis on a woman's life course helps provide a  
3 clearer understanding of her complete experience with the disease and shows that most women  
4 experience a high burden associated with endometriosis that affects overall life potential in  
5 many different ways.

6  
7  
8  
9  
10  
11  
12  
13  
14  
15  
16  
17  
18  
19  
20  
21  
22  
23  
24  
25  
26  
27  
28  
29  
30  
31  
32  
33  
34  
35  
36  
37  
38  
39  
40  
41  
42  
43  
44  
45  
46  
47  
48  
49  
50  
51  
52  
53  
54  
55  
56  
57  
58  
59  
60

For peer review only



1  
2  
3 1 **Acknowledgements** Financial assistance in developing the survey and collecting data was  
4 provided by AbbVie. In partnership with MyHealthTeams, AbbVie participated in the  
5  
6 2 interpretation of data, review, and approval of the manuscript, and was involved in the decision  
7  
8 3 to submit the manuscript for publication. Medical writing support, funded by AbbVie, was  
9  
10 4 provided by Michael M. Schofield, PhD, Callie A. S. Corsa, PhD, and Kersten Reich, MPH,  
11  
12 5 CMPP, of JB Ashtin, who developed the first draft based on an author-approved outline and  
13  
14 6 assisted in implementing author revisions.  
15  
16 7

17  
18  
19  
20 8 **Contributors:** SAM, FT, OAF, AH, BS, and SA-S contributed to the study concept and design.  
21  
22 9 BS contributed to data acquisition and statistical analysis. SAM, FT, AMS, SEC, SC, SE, OAF,  
23  
24 10 AH, BS, and SA-S contributed to data interpretation.  
25  
26  
27

28 11 **Funding** Financial support for this study was provided by AbbVie Inc. Award/Grant number is  
29  
30 12 not applicable.  
31  
32  
33  
34  
35  
36  
37

38 15 **Competing interests** SA Missmer is a consultant for AbbVie, Oratel Diagnostics, and Celmatix  
39  
40 16 and receives research support from the National Institutes of Health, Department of Defense,  
41  
42 17 and Marriott Family Foundations.  
43  
44  
45  
46

47 18 FF Tu has received research support from NICHD-NIH and NIDDK-NIH, earns royalties from  
48  
49 19 UpToDate, has served as a consultant for AbbVie, Myovant, and Uroshape, and conducts  
50  
51 20 sponsored research for Eximis and Dot Laboratories.  
52  
53  
54  
55  
56  
57  
58  
59  
60

1  
2  
3 1 AM Soliman, S Chiuve, S Cross, S Eichner, and O Antunez Flores are employees of AbbVie  
4  
5 2 and may own AbbVie stock/stock options.  
6  
7

8  
9 3 A Horne has received grant funding from the UK MRC, NIHR, CSO, Wellbeing of Women,  
10  
11 4 Ferring, AstraZeneca, the Charles Wolfson Charitable Trust, and Standard Life. His institution  
12  
13 5 has received consultancy fees from Roche Diagnostics, Nordic Pharma, Ferring and AbbVie. He  
14  
15 6 is Chair of the RCOG Academic Board, ESHRE National Representative for the UK, WES  
16  
17 7 Board Member and Ambassador, SEUD Board Member, Trustee and Medical Advisor to  
18  
19 8 Endometriosis UK, and Medical Advisor to Pelvic Pain Support Network.  
20  
21

22  
23  
24 9 B Schneider is an employee of MyHealthTeams, which received compensation for the study and  
25  
26 10 conducted the research on behalf of AbbVie.  
27  
28

29  
30 11 S As-Sanie earns author royalties from UpToDate and has served as a consultant for AbbVie,  
31  
32 12 Myovant, and Eximis.  
33  
34

### 35 36 13 **Data Sharing Statement** 37

38  
39 14 AbbVie is committed to responsible data sharing regarding the clinical trials and  
40  
41 15 studies we sponsor. This includes access to anonymized, individual and trial-level data  
42  
43 16 (analysis data sets), as well as other information (eg, protocols and clinical study  
44  
45 17 reports), as long as the trials are not part of an ongoing or planned regulatory  
46  
47 18 submission. This includes requests for clinical trial data for unlicensed products and  
48  
49 19 indications.  
50  
51

52  
53 20 This study data can be requested by any qualified researchers who engage in rigorous,  
54  
55 21 independent scientific research, and will be provided following review and approval of a  
56  
57

1  
2  
3 1 research proposal and statistical analysis plan and execution of a data sharing  
4  
5 2 agreement. Data requests can be submitted at any time and the data will be accessible  
6  
7 3 for 12 months, with possible extensions considered. For more information on the  
8  
9 4 process, or to submit a request, visit the following link: [https://www.abbvie.com/our-](https://www.abbvie.com/our-science/clinical-trials/clinical-trials-data-and-information-sharing/data-and-information-sharing-with-qualified-researchers.html)  
10  
11 science/clinical-trials/clinical-trials-data-and-information-sharing/data-and-information-  
12 5 sharing-with-qualified-researchers.html.  
13  
14 6  
15  
16 7

For peer review only

**1 REFERENCES**

1. Zondervan KT, Becker CM, Missmer SA. Endometriosis. *N Engl J Med* 2020;382:1244-56.
2. Kennedy S, Bergqvist A, Chapron C, *et al*. Eshre guideline for the diagnosis and treatment of endometriosis. *Hum Reprod* 2005;20:2698-704.
3. Practice bulletin no. 114: Management of endometriosis. *Obstet Gynecol* 2010;116:223-36.
4. Zondervan KT, Becker CM, Koga K, *et al*. Endometriosis. *Nat Rev Dis Primers* 2018;4:9.
5. De Graaff AA, D'Hooghe TM, Dunselman GA, *et al*. The significant effect of endometriosis on physical, mental and social wellbeing: Results from an international cross-sectional survey. *Hum Reprod* 2013;28:2677-85.
6. Gallagher JS, DiVasta AD, Vitonis AF, *et al*. The impact of endometriosis on quality of life in adolescents. *J Adolesc Health* 2018;63:766-72.
7. Lagana AS, La Rosa VL, Rapisarda AMC, *et al*. Anxiety and depression in patients with endometriosis: Impact and management challenges. *Int J Womens Health* 2017;9:323-30.
8. Vannuccini S, Lazzeri L, Orlandini C, *et al*. Mental health, pain symptoms and systemic comorbidities in women with endometriosis: A cross-sectional study. *J Psychosom Obstet Gynaecol* 2018;39:315-20.
9. Culley L, Law C, Hudson N, *et al*. A qualitative study of the impact of endometriosis on male partners. *Hum Reprod* 2017;32:1667-73.
10. Denny E, Mann CH. Endometriosis-associated dyspareunia: The impact on women's lives. *J Fam Plann Reprod Health Care* 2007;33:189-93.

- 1  
2  
3 1 11. Fagervold B, Jenssen M, Hummelshoj L, *et al*. Life after a diagnosis with endometriosis - a  
4 2 15 years follow-up study. *Acta Obstet Gynecol Scand* 2009;88:914-9.  
5  
6  
7  
8 3 12. Soliman AM, Coyne KS, Gries KS, *et al*. The effect of endometriosis symptoms on  
9 4 absenteeism and presenteeism in the workplace and at home. *J Manag Care Spec Pharm*  
10 5 2017;23:745-54.  
11  
12  
13  
14  
15 6 13. Leonardi M, Horne AW, Armour M, *et al*. Endometriosis and the coronavirus (covid-19)  
16 7 pandemic: Clinical advice and future considerations. *Frontiers in Reproductive Health* 2020;2  
17  
18  
19  
20 8 14. Leonardi M, Horne AW, Vincent K, *et al*. Self-management strategies to consider to combat  
21 9 endometriosis symptoms during the covid-19 pandemic. *Hum Reprod Open*  
22 10 2020;2020:hoaa028.  
23  
24  
25  
26  
27 11 15. Klein S, D'Hooghe T, Meuleman C, *et al*. What is the societal burden of endometriosis-  
28 12 associated symptoms? A prospective belgian study. *Reprod Biomed Online* 2014;28:116-24.  
29  
30  
31  
32 13 16. Simoens S, Dunselman G, Dirksen C, *et al*. The burden of endometriosis: Costs and quality  
33 14 of life of women with endometriosis and treated in referral centres. *Hum Reprod*  
34 15 2012;27:1292-9.  
35  
36  
37  
38  
39 16 17. Soliman AM, Taylor HS, Bonafede M, *et al*. Incremental direct and indirect cost burden  
40 17 attributed to endometriosis surgeries in the united states. *Fertil Steril* 2017;107:1181-90 e2.  
41  
42  
43  
44 18 18. Soliman AM, Yang H, Du EX, *et al*. The direct and indirect costs associated with  
45 19 endometriosis: A systematic literature review. *Hum Reprod* 2016;31:712-22.  
46  
47  
48  
49 20 19. Bhatti Z, Salek M, Finlay A. Chronic diseases influence major life changing decisions: A new  
50 21 domain in quality of life research. *J R Soc Med* 2011;104:241-50.  
51  
52  
53  
54  
55  
56  
57  
58  
59  
60

- 1  
2  
3 1 20. Kimball AB, Gieler U, Linder D, *et al*. Psoriasis: Is the impairment to a patient's life  
4 2 cumulative? *J Eur Acad Dermatol Venereol* 2010;24:989-1004.  
5  
6  
7  
8 3 21. Huntington A, Gilmour JA. A life shaped by pain: Women and endometriosis. *J Clin Nurs*  
9 4 2005;14:1124-32.  
10  
11  
12  
13 5 22. Moradi M, Parker M, Sneddon A, *et al*. Impact of endometriosis on women's lives: A  
14 6 qualitative study. *BMC Womens Health* 2014;14:123.  
15  
16  
17  
18 7 23. Cole JM, Grogan S, Turley E. "The most lonely condition i can imagine": Psychosocial  
19 8 impacts of endometriosis on women's identity. *Feminism & Psychology* 2021;31:171-91.  
20  
21  
22  
23  
24 9 24. Apers S, Dancet EAF, Aarts JWM, *et al*. The association between experiences with patient-  
25 10 centred care and health-related quality of life in women with endometriosis. *Reprod Biomed*  
26 11 *Online* 2018;36:197-205.  
27  
28  
29  
30  
31 12 25. Witzeman K, Antunez Flores O, Renzelli-Cain RI, *et al*. Patient-physician interactions  
32 13 regarding dyspareunia with endometriosis: Online survey results. *J Pain Res* 2020;13:1579-  
33 14 89.  
34  
35  
36  
37 15 26. Bourdel N, Alves J, Pickering G, *et al*. Systematic review of endometriosis pain assessment:  
38 16 How to choose a scale? *Hum Reprod Update* 2015;21:136-52.  
39  
40  
41  
42  
43 17 27. Chawla S. Treatment of endometriosis and chronic pelvic pain with letrozole and  
44 18 norethindrone acetate. *Med J Armed Forces India* 2010;66:213-5.  
45  
46  
47  
48 19 28. Facchin F, Barbara G, Saita E, *et al*. Impact of endometriosis on quality of life and mental  
49 20 health: Pelvic pain makes the difference. *J Psychosom Obstet Gynaecol* 2015;36:135-41.  
50  
51  
52  
53 21 29. Ballard K, Lowton K, Wright J. What's the delay? A qualitative study of women's experiences  
54 22 of reaching a diagnosis of endometriosis. *Fertil Steril* 2006;86:1296-301.  
55  
56  
57  
58  
59  
60

- 1  
2  
3 1 30. Bernuit D, Ebert AD, Halis G, *et al*. Female perspectives on endometriosis: Findings from  
4 2 the uterine bleeding and pain women's research study. *Journal of Endometriosis* 2011;3:73-  
5 3 85.  
6  
7  
8  
9  
10 4 31. Greene R, Stratton P, Cleary SD, *et al*. Diagnostic experience among 4,334 women  
11 5 reporting surgically diagnosed endometriosis. *Fertil Steril* 2009;91:32-9.  
12  
13  
14  
15 6 32. Hadfield R, Mardon H, Barlow D, *et al*. Delay in the diagnosis of endometriosis: A survey of  
16 7 women from the USA and the uk. *Hum Reprod* 1996;11:878-80.  
17  
18  
19  
20 8 33. Hudelist G, Fritzer N, Thomas A, *et al*. Diagnostic delay for endometriosis in austria and  
21 9 germany: Causes and possible consequences. *Hum Reprod* 2012;27:3412-6.  
22  
23  
24  
25 10 34. Nnoaham KE, Hummelshoj L, Webster P, *et al*. Impact of endometriosis on quality of life  
26 11 and work productivity: A multicenter study across ten countries. *Fertil Steril* 2011;96:366-73  
27 12 e8.  
28  
29  
30  
31  
32 13 35. Soliman AM, Fuldeore M, Snabes MC. Factors associated with time to endometriosis  
33 14 diagnosis in the united states. *J Womens Health (Larchmt)* 2017;26:788-97.  
34  
35  
36  
37 15 36. Staal AH, van der Zanden M, Nap AW. Diagnostic delay of endometriosis in the  
38 16 netherlands. *Gynecol Obstet Invest* 2016;81:321-4.  
39  
40  
41  
42 17 37. Nnoaham KE, Hummelshoj L, Kennedy SH, *et al*. Developing symptom-based predictive  
43 18 models of endometriosis as a clinical screening tool: Results from a multicenter study. *Fertil*  
44 19 *Steril* 2012;98:692-701 e5.  
45  
46  
47  
48  
49 20 38. Brosens I, Puttemans P, Campo R, *et al*. Non-invasive methods of diagnosis of  
50 21 endometriosis. *Curr Opin Obstet Gynecol* 2003;15:519-22.  
51  
52  
53  
54  
55  
56  
57  
58  
59  
60

- 1  
2  
3 1 39. Lamvu G, Antunez-Flores O, Orady M, *et al*. Path to diagnosis and women's perspectives  
4 2 on the impact of endometriosis pain. *Journal of Endometriosis and Pelvic Pain Disorders*  
5 3 2020;2284026520903214.  
6  
7  
8  
9  
10 4 40. Gilmour JA, Huntington A, Wilson HV. The impact of endometriosis on work and social  
11 5 participation. *Int J Nurs Pract* 2008;14:443-8.  
12  
13  
14  
15 6 41. Murray CB, Groenewald CB, de la Vega R, *et al*. Long-term impact of adolescent chronic  
16 7 pain on young adult educational, vocational, and social outcomes. *Pain* 2020;161:439-45.  
17  
18  
19  
20 8 42. Kashikar-Zuck S, Lynch AM, Graham TB, *et al*. Social functioning and peer relationships of  
21 9 adolescents with juvenile fibromyalgia syndrome. *Arthritis Rheum* 2007;57:474-80.  
22  
23  
24  
25 10 43. de Graaf R, Tuithof M, van Dorsselaer S, *et al*. Comparing the effects on work performance  
26 11 of mental and physical disorders. *Soc Psychiatry Psychiatr Epidemiol* 2012;47:1873-83.  
27  
28  
29  
30  
31 12 44. Smorgick N, Marsh CA, As-Sanie S, *et al*. Prevalence of pain syndromes, mood conditions,  
32 13 and asthma in adolescents and young women with endometriosis. *J Pediatr Adolesc Gynecol*  
33 14 2013;26:171-5.  
34  
35  
36  
37 15 45. Yosef A, Allaire C, Williams C, *et al*. Multifactorial contributors to the severity of chronic  
38 16 pelvic pain in women. *Am J Obstet Gynecol* 2016;215:760 e1-60 e14.  
39  
40  
41  
42 17 46. Evans SF, Brooks TA, Esterman AJ, *et al*. The comorbidities of dysmenorrhea: A clinical  
43 18 survey comparing symptom profile in women with and without endometriosis. *J Pain Res*  
44 19 2018;11:3181-94.  
45  
46  
47  
48  
49 20 47. Fourquet J, Baez L, Figueroa M, *et al*. Quantification of the impact of endometriosis  
50 21 symptoms on health-related quality of life and work productivity. *Fertil Steril* 2011;96:107-12.  
51  
52  
53  
54  
55  
56  
57  
58  
59  
60



- 1  
2  
3 1 48. Sperschneider ML, Hengartner MP, Kohl-Schwartz A, *et al*. Does endometriosis affect  
4 2 professional life? A matched case-control study in Switzerland, Germany and Austria. *BMJ*  
5 3 *open* 2019;9:e019570.  
6  
7  
8  
9  
10 4 49. Prescott J, Farland LV, Tobias DK, *et al*. A prospective cohort study of endometriosis and  
11 5 subsequent risk of infertility. *Hum Reprod* 2016;31:1475-82.  
12  
13  
14  
15 6 50. Geisser ME, Cano A, Leonard MT. Factors associated with marital satisfaction and mood  
16 7 among spouses of persons with chronic back pain. *J Pain* 2005;6:518-25.  
17  
18  
19  
20 8 51. Leonard MT, Cano A. Pain affects spouses too: Personal experience with pain and  
21 9 catastrophizing as correlates of spouse distress. *Pain* 2006;126:139-46.  
22  
23  
24  
25 10 52. Fourquet J, Gao X, Zavala D, *et al*. Patients' report on how endometriosis affects health,  
26 11 work, and daily life. *Fertil Steril* 2010;93:2424-28.  
27  
28  
29  
30  
31 12 53. Maleki N, Tahaney K, Thompson BL, *et al*. At the intersection of alcohol use disorder and  
32 13 chronic pain. *Neuropsychology* 2019;33:795-807.  
33  
34  
35  
36 14 54. Groenewald CB, Law EF, Fisher E, *et al*. Associations between adolescent chronic pain and  
37 15 prescription opioid misuse in adulthood. *J Pain* 2019;20:28-37.  
38  
39  
40  
41 16 55. Lazzeri L, Orlandini C, Vannuccini S, *et al*. Endometriosis and perceived stress: Impact of  
42 17 surgical and medical treatment. *Gynecol Obstet Invest* 2015;79:229-33.  
43  
44  
45  
46 18 56. Oehmke F, Weyand J, Hackethal A, *et al*. Impact of endometriosis on quality of life: A pilot  
47 19 study. *Gynecol Endocrinol* 2009;25:722-5.  
48  
49  
50  
51 20 57. Ugwumadu L, Chakrabarti R, Williams-Brown E, *et al*. The role of the multidisciplinary team  
52 21 in the management of deep infiltrating endometriosis. *Gynecol Surg* 2017;14:15.  
53  
54  
55  
56  
57  
58  
59  
60

- 1  
2  
3 1 58. Aarts JW, Huppelschoten AG, van Empel IW, *et al*. How patient-centred care relates to  
4 2 patients' quality of life and distress: A study in 427 women experiencing infertility. *Hum*  
5 3 *Reprod* 2012;27:488-95.  
6  
7  
8  
9  
10 4 59. Gameiro S, Canavarro MC, Boivin J. Patient centred care in infertility health care: Direct and  
11 5 indirect associations with wellbeing during treatment. *Patient Educ Couns* 2013;93:646-54.  
12  
13  
14  
15 6  
16  
17 7  
18  
19  
20  
21  
22  
23  
24  
25  
26  
27  
28  
29  
30  
31  
32  
33  
34  
35  
36  
37  
38  
39  
40  
41  
42  
43  
44  
45  
46  
47  
48  
49  
50  
51  
52  
53  
54  
55  
56  
57  
58  
59  
60

1  
2  
3 **1 FIGURE LEGENDS**  
4  
5

6  
7 **2 Figure 1** Life-course impact of endometriosis. Women were asked to indicate how much they  
8  
9  
10 **3** agreed with statements involving the impact of endometriosis on (A) educational and  
11  
12 **4** professional achievements, (B) social life and relationships, (C) physical well-being, and (D)  
13  
14 **5** overall life course.  
15

16  
17  
18 **6 Figure 2** Experiences and emotions attributed to endometriosis. Respondents were asked to  
19  
20 **7** select which experiences related to endometriosis had the most negative impacts on their life  
21  
22 **8** potential (A). Women were also asked to indicate which general negative experiences (B) and  
23  
24 **9** emotions (C) they had undergone because of endometriosis and what kinds of approaches they  
25  
26 **10** had taken to manage the impact of endometriosis (D).  
27  
28  
29

30  
31 **11**  
32  
33  
34  
35  
36  
37  
38  
39  
40  
41  
42  
43  
44  
45  
46  
47  
48  
49  
50  
51  
52  
53  
54  
55  
56  
57  
58  
59  
60

FIGURE 1

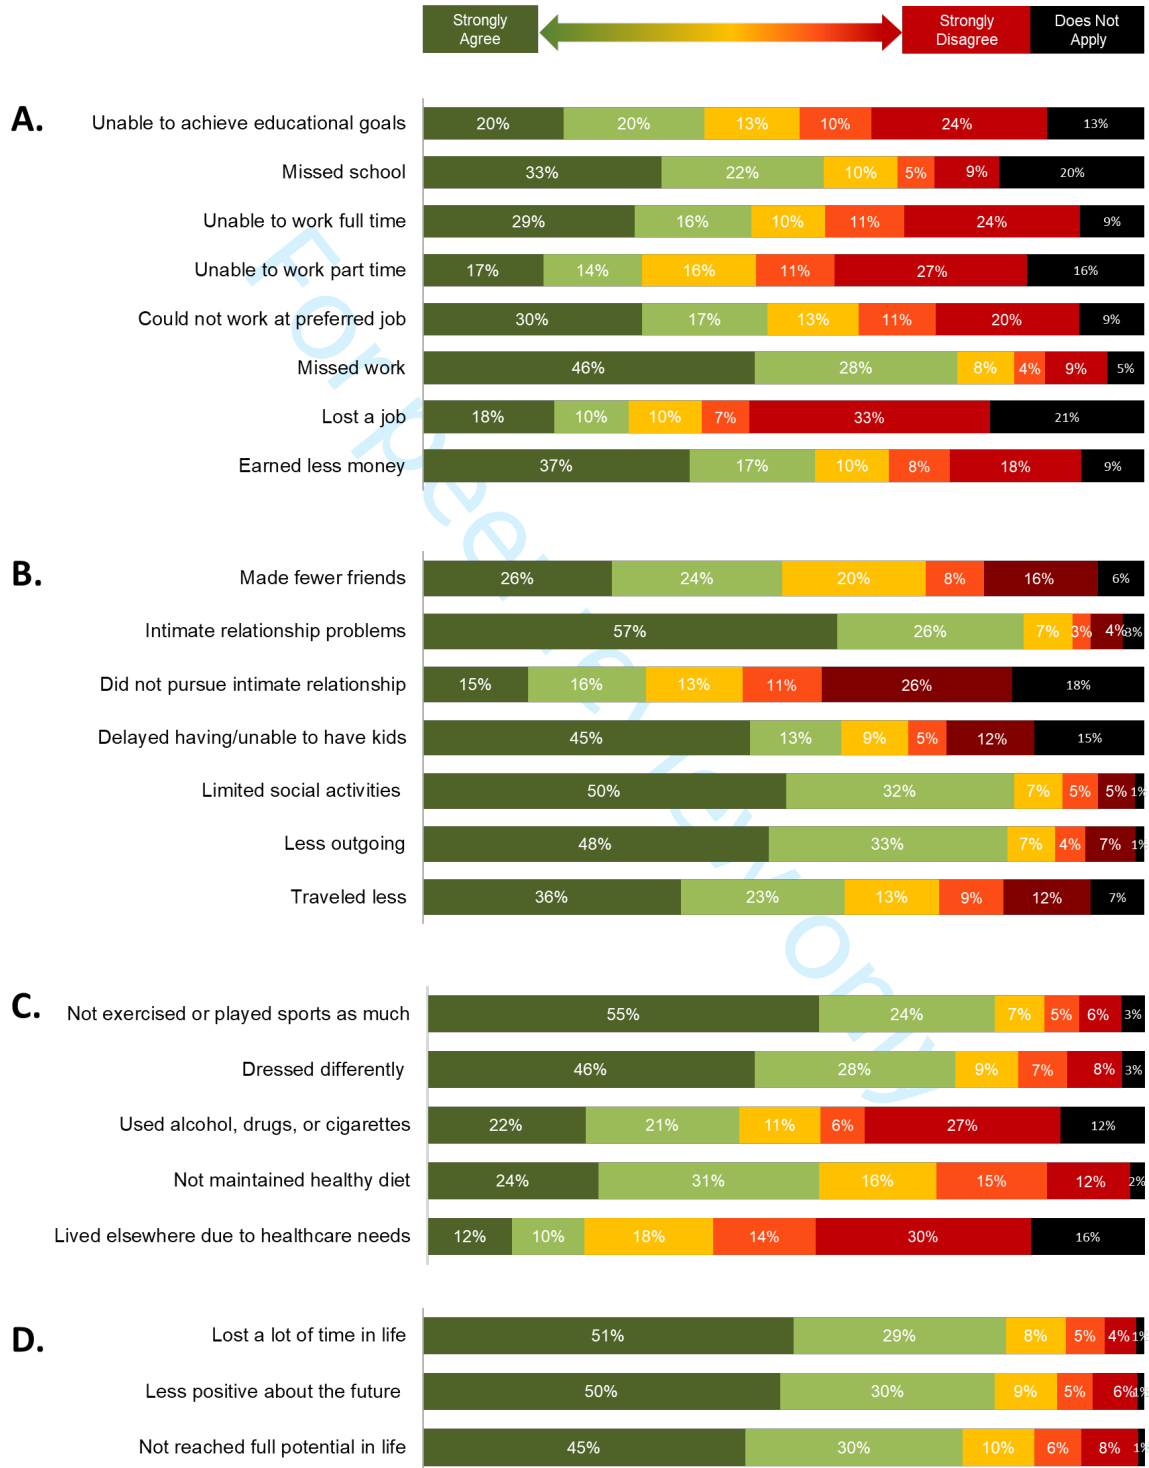

FIGURE 2



1  
2  
3 **1 The impact of endometriosis on women's life decisions and goal attainment measured in**  
4  
5 **2 a cross-sectional survey of members of an online patient community**  
6  
7

8  
9 3 Stacey A Missmer,<sup>1</sup> Frank F Tu,<sup>2</sup> Ahmed M Soliman,<sup>3</sup> Stephanie E Chiuve,<sup>3</sup> Sarah Cross,<sup>3</sup>  
10  
11 4 Samantha Eichner,<sup>3</sup> Oscar Antunez Flores,<sup>3</sup> Andrew W Horne,<sup>4</sup> Beth Schneider,<sup>5</sup> Sawsan As-  
12  
13 5 Sanie<sup>6</sup>  
14  
15

16  
17 6 <sup>1</sup>Department of Epidemiology, Harvard T. H. Chan School of Public Health; and Boston Center  
18  
19 7 for Endometriosis, Boston, Massachusetts, USA, and Department of Obstetrics, Gynecology,  
20  
21 8 and Reproductive Biology, Michigan State University, Grand Rapids, Michigan, USA;

22  
23 9 <sup>2</sup>Department of Obstetrics and Gynecology, NorthShore University Health System and Pritzker  
24  
25 10 School of Medicine, University of Chicago, Evanston, Illinois, USA; <sup>3</sup>AbbVie Inc, North Chicago,  
26  
27 11 Illinois, USA; <sup>4</sup>Medical Research Council Centre for Reproductive Health, University of  
28  
29 12 Edinburgh, Edinburgh, UK; <sup>5</sup>MyHealthTeams, San Francisco, California, USA; <sup>6</sup>Department of  
30  
31 13 Obstetrics and Gynecology, University of Michigan, Ann Arbor, Michigan, USA.  
32  
33  
34  
35  
36  
37  
38  
39  
40  
41  
42  
43  
44  
45  
46  
47  
48  
49  
50  
51  
52  
53  
54  
55  
56  
57  
58  
59  
60

1  
2  
3 **1 SUPPORTING INFORMATION**  
4  
5

6  
7 **2 Supporting Information Table 1.** Women indicated how much they agreed or disagreed with  
8  
9  
10 **3** the impact of endometriosis on the following: (A) pain, (B) work and education, (C) life  
11  
12 **4** experiences altered in a negative way, (D) impact on life, (E) feelings, and (F) management of  
13  
14 **5** impact.  
15

16  
17  
18 **6 Supporting Information Figure 1.** Impact of endometriosis on educational and professional  
19  
20 **7** achievements in the United States (A) and in the rest of the world (B).  
21  
22

23  
24 **8 Survey.** MyEndometriosisTeam Survey – Life Course Impact Survey  
25  
26  
27  
28  
29  
30  
31  
32  
33  
34  
35  
36  
37  
38  
39  
40  
41  
42  
43  
44  
45  
46  
47  
48  
49  
50  
51  
52  
53  
54  
55  
56  
57  
58  
59  
60

Supporting Information Table 1.

| <b>S1A</b>                                               | <b>Daily</b> | <b>A few times<br/>a week</b> | <b>A few times<br/>a month</b> | <b>Weekly</b> | <b>Monthly</b> | <b>Every few<br/>months</b> | <b>Never</b> | <b>Once or<br/>twice a<br/>year</b> |
|----------------------------------------------------------|--------------|-------------------------------|--------------------------------|---------------|----------------|-----------------------------|--------------|-------------------------------------|
| <b>Total, n (%)<br/>(N = 743)</b>                        | 415 (55.9)   | 160 (21.5)                    | 78 (10.5)                      | 43 (5.8)      | 31 (4.2)       | 9 (1.2)                     | 4 (0.5)      | 3 (0.4)                             |
| <b>Less positive about future, n (%)<br/>(n = 589)</b>   | 362 (61.5)   | 120 (20.4)                    | 50 (8.5)                       | 31 (5.3)      | 16 (2.7)       | 6 (1.0)                     | 2 (0.3)      | 2 (0.3)                             |
| <b>Remaining respondents<br/>(n = 154)</b>               | 53 (34.4)    | 40 (26.0)                     | 28 (18.2)                      | 12 (7.8)      | 15 (9.7)       | 3 (1.9)                     | 2 (1.3)      | 1 (0.6)                             |
| <b>Did not reach full potential, n (%)<br/>(n = 556)</b> | 341 (61.3)   | 121 (21.8)                    | 44 (7.9)                       | 28 (5.0)      | 13 (2.3)       | 6 (1.1)                     | 2 (0.4)      | 1 (0.2)                             |
| <b>Remaining respondents<br/>(n = 187)</b>               | 74 (39.6)    | 39 (20.9)                     | 15 (8.0)                       | 34 (18.2)     | 18 (9.6)       | 3 (1.6)                     | 2 (1.1)      | 2 (1.1)                             |

  

| <b>S1B</b>                                               | <b>Missed days of<br/>work</b> | <b>Missed school</b> | <b>Earned less<br/>money</b> | <b>Could not<br/>work at<br/>preferred job</b> | <b>Unable to<br/>work full time</b> | <b>Unable to<br/>achieve<br/>educational<br/>goals</b> | <b>Unable to<br/>work part time</b> | <b>Lost a job</b> |
|----------------------------------------------------------|--------------------------------|----------------------|------------------------------|------------------------------------------------|-------------------------------------|--------------------------------------------------------|-------------------------------------|-------------------|
| <b>Total, n (%)<br/>(N = 743)</b>                        | 550 (74.9)                     | 413 (56.3)           | 404 (55.0)                   | 355 (48.4)                                     | 338 (46.0)                          | 290 (39.5)                                             | 226 (30.8)                          | 212 (28.9)        |
| <b>Less positive about future, n (%)<br/>(n = 589)</b>   | 463 (78.6)                     | 343 (58.2)           | 359 (61.0)                   | 316 (53.7)                                     | 300 (50.9)                          | 257 (43.6)                                             | 202 (34.3)                          | 190 (32.3)        |
| <b>Remaining respondents<br/>(n = 154)</b>               | 87 (56.5)                      | 70 (45.5)            | 45 (29.2)                    | 39 (25.3)                                      | 38 (24.7)                           | 33 (21.4)                                              | 24 (15.6)                           | 22 (14.3)         |
| <b>Did not reach full potential, n (%)<br/>(n = 556)</b> | 448 (80.6)                     | 329 (59.2)           | 365 (65.6)                   | 323 (58.1)                                     | 295 (53.1)                          | 261 (46.9)                                             | 205 (36.9)                          | 193 (34.7)        |
| <b>Remaining respondents<br/>(n = 187)</b>               | 102 (54.5)                     | 84 (44.9)            | 39 (20.9)                    | 32 (17.1)                                      | 43 (23.0)                           | 29 (15.5)                                              | 21 (11.2)                           | 19 (10.2)         |



| <b>S1C</b>                                               | <b>Pelvic pain<br/>apart from<br/>period</b> | <b>Painful<br/>periods</b> | <b>Pelvic pain<br/>during period</b> | <b>Depression or<br/>anxiety</b> | <b>Painful sexual<br/>intercourse</b> | <b>Heavy period-<br/>related<br/>bleeding</b> | <b>Other<br/>endometriosis-<br/>related pain</b> | <b>Taken<br/>prescription<br/>for symptoms</b> | <b>Multiple<br/>surgeries</b> | <b>Infertility</b> | <b>Other<br/>symptoms or<br/>conditions</b> |
|----------------------------------------------------------|----------------------------------------------|----------------------------|--------------------------------------|----------------------------------|---------------------------------------|-----------------------------------------------|--------------------------------------------------|------------------------------------------------|-------------------------------|--------------------|---------------------------------------------|
| <b>Total, n (%)<br/>(N = 743)</b>                        | 651 (87.6)                                   | 650 (87.5)                 | 633 (85.2)                           | 598 (80.5)                       | 576 (77.5)                            | 524 (70.5)                                    | 452 (60.8)                                       | 427 (57.5)                                     | 363 (48.9)                    | 342 (46.0)         | 317 (42.7)                                  |
| <b>Less positive about future, n (%)<br/>(n = 589)</b>   | 528 (89.6)                                   | 517 (87.8)                 | 506 (85.9)                           | 505 (85.7)                       | 461 (78.3)                            | 413 (70.1)                                    | 382 (64.9)                                       | 353 (59.9)                                     | 297 (50.4)                    | 272 (46.2)         | 268 (45.5)                                  |
| <b>Remaining respondents<br/>(n = 154)</b>               | 123 (79.9)                                   | 133 (86.4)                 | 127 (82.5)                           | 93 (60.4)                        | 115 (74.7)                            | 111 (72.1)                                    | 70 (45.5)                                        | 74 (48.1)                                      | 66 (42.9)                     | 70 (45.5)          | 49 (31.8)                                   |
| <b>Did not reach full potential, n (%)<br/>(n = 556)</b> | 500 (89.9)                                   | 491 (88.3)                 | 482 (86.7)                           | 476 (85.6)                       | 430 (77.3)                            | 400 (71.9)                                    | 366 (65.8)                                       | 332 (59.7)                                     | 284 (51.1)                    | 261 (46.9)         | 259 (46.6)                                  |
| <b>Remaining respondents<br/>(n = 187)</b>               | 151 (80.7)                                   | 159 (85.0)                 | 151 (80.7)                           | 122 (65.2)                       | 146 (78.1)                            | 124 (66.3)                                    | 86 (46.0)                                        | 95 (50.8)                                      | 79 (42.2)                     | 81 (43.3)          | 58 (31.0)                                   |

| <b>S1D</b>                                               | <b>Trouble<br/>performing<br/>daily tasks</b> | <b>Taken Rx<br/>pain<br/>medication</b> | <b>Gone to ER</b> | <b>Multiple<br/>surgeries</b> | <b>Depression/<br/>anxiety<br/>medication</b> | <b>Unable to<br/>get<br/>pregnant</b> | <b>Saw mental<br/>health<br/>professional</b> | <b>Hospitalized<br/>overnight</b> | <b>Experienced<br/>miscarriage</b> | <b>Relationship<br/>ended<br/>because<br/>unable to<br/>have sex</b> |
|----------------------------------------------------------|-----------------------------------------------|-----------------------------------------|-------------------|-------------------------------|-----------------------------------------------|---------------------------------------|-----------------------------------------------|-----------------------------------|------------------------------------|----------------------------------------------------------------------|
| <b>Total, n (%)<br/>(N = 743)</b>                        | 594 (80.9)                                    | 529 (72.1)                              | 485 (66.1)        | 406 (55.3)                    | 380 (51.8)                                    | 317 (43.2)                            | 316 (43.1)                                    | 313 (42.6)                        | 213 (29.0)                         | 147 (20.0)                                                           |
| <b>Less positive about future, n (%)<br/>(n = 589)</b>   | 500 (84.9)                                    | 442 (75.0)                              | 406 (68.9)        | 333 (56.5)                    | 327 (55.5)                                    | 251 (42.6)                            | 276 (46.9)                                    | 266 (45.2)                        | 167 (28.4)                         | 132 (22.4)                                                           |
| <b>Remaining respondents<br/>(n = 154)</b>               | 94 (61.0)                                     | 87 (56.5)                               | 79 (51.3)         | 73 (47.4)                     | 53 (34.4)                                     | 66 (42.9)                             | 40 (26.0)                                     | 47 (30.5)                         | 46 (29.9)                          | 15 (9.7)                                                             |
| <b>Did not reach full potential, n (%)<br/>(n = 556)</b> | 478 (86.0)                                    | 421 (75.7)                              | 390 (70.1)        | 311 (55.9)                    | 308 (55.4)                                    | 239 (43.0)                            | 265 (47.7)                                    | 249 (44.8)                        | 166 (29.9)                         | 132 (23.7)                                                           |
| <b>Remaining respondents<br/>(n = 187)</b>               | 116 (62.0)                                    | 108 (57.8)                              | 95 (50.8)         | 95 (50.8)                     | 72 (38.5)                                     | 78 (41.7)                             | 51 (27.3)                                     | 64 (34.2)                         | 47 (25.1)                          | 15 (8.0)                                                             |

| S1E                                                      | Depressed                         | Anxious    | Unsexy     | Low self-esteem | Insecure   | Inadequate | Embarrassed | Unfulfilled | Judged by others | Guilty     |
|----------------------------------------------------------|-----------------------------------|------------|------------|-----------------|------------|------------|-------------|-------------|------------------|------------|
|                                                          | <b>Total, n (%)<br/>(N = 743)</b> | 607 (82.7) | 592 (80.7) | 572 (77.9)      | 554 (75.5) | 538 (73.3) | 487 (66.3)  | 479 (65.3)  | 437 (59.5)       | 428 (58.3) |
| <b>Less positive about future, n (%)<br/>(n = 589)</b>   | 517 (87.8)                        | 491 (83.4) | 468 (79.5) | 478 (81.2)      | 469 (79.6) | 421 (71.5) | 415 (70.5)  | 387 (65.7)  | 380 (64.5)       | 350 (59.4) |
| <b>Remaining respondents<br/>(n = 154)</b>               | 90 (58.4)                         | 101 (65.6) | 104 (67.5) | 76 (49.4)       | 69 (44.8)  | 66 (42.9)  | 64 (41.6)   | 50 (32.5)   | 48 (31.2)        | 52 (33.8)  |
| <b>Did not reach full potential, n (%)<br/>(n = 556)</b> | 487 (87.6)                        | 462 (83.1) | 441 (79.3) | 443 (79.7)      | 434 (78.1) | 401 (72.1) | 393 (70.7)  | 375 (67.4)  | 352 (63.3)       | 330 (59.4) |
| <b>Remaining respondents<br/>(n = 187)</b>               | 120 (64.2)                        | 130 (69.5) | 131 (70.1) | 111 (59.4)      | 104 (55.6) | 86 (46.0)  | 86 (46.0)   | 62 (33.2)   | 76 (40.6)        | 72 (38.5)  |

  

| S1F                                                      | Talk to spouse or partner         | Use non-medical methods for pain | Talk to friends and family | Educate self on treatments | Make doctor listen and respond to needs | Engage with other women with same experiences | Schedule social events around period | Pelvic floor or other exercises | Other      | None of these |
|----------------------------------------------------------|-----------------------------------|----------------------------------|----------------------------|----------------------------|-----------------------------------------|-----------------------------------------------|--------------------------------------|---------------------------------|------------|---------------|
|                                                          | <b>Total, n (%)<br/>(N = 743)</b> | 560 (76.3)                       | 533 (72.6)                 | 508 (69.2)                 | 502 (68.4)                              | 455 (62.0)                                    | 409 (55.7)                           | 304 (41.4)                      | 193 (26.3) | 70 (9.5)      |
| <b>Less positive about future, n (%)<br/>(n = 589)</b>   | 445 (75.6)                        | 425 (72.2)                       | 409 (69.4)                 | 409 (69.4)                 | 369 (62.6)                              | 337 (57.2)                                    | 257 (43.6)                           | 162 (27.5)                      | 61 (10.4)  | 19 (3.2)      |
| <b>Remaining respondents<br/>(n = 154)</b>               | 115 (74.7)                        | 108 (70.1)                       | 99 (64.3)                  | 93 (60.4)                  | 86 (55.8)                               | 72 (46.8)                                     | 47 (30.5)                            | 31 (20.1)                       | 9 (5.8)    | 7 (4.5)       |
| <b>Did not reach full potential, n (%)<br/>(n = 556)</b> | 418 (75.2)                        | 405 (72.8)                       | 383 (68.9)                 | 394 (70.9)                 | 345 (62.1)                              | 325 (58.5)                                    | 246 (44.2)                           | 153 (27.5)                      | 59 (10.6)  | 20 (3.6)      |
| <b>Remaining respondents<br/>(n = 187)</b>               | 142 (75.9)                        | 128 (68.4)                       | 125 (66.8)                 | 108 (57.8)                 | 110 (58.8)                              | 84 (44.9)                                     | 58 (31.0)                            | 40 (21.4)                       | 11 (5.9)   | 6 (3.2)       |

## Supporting Information Figure 1.

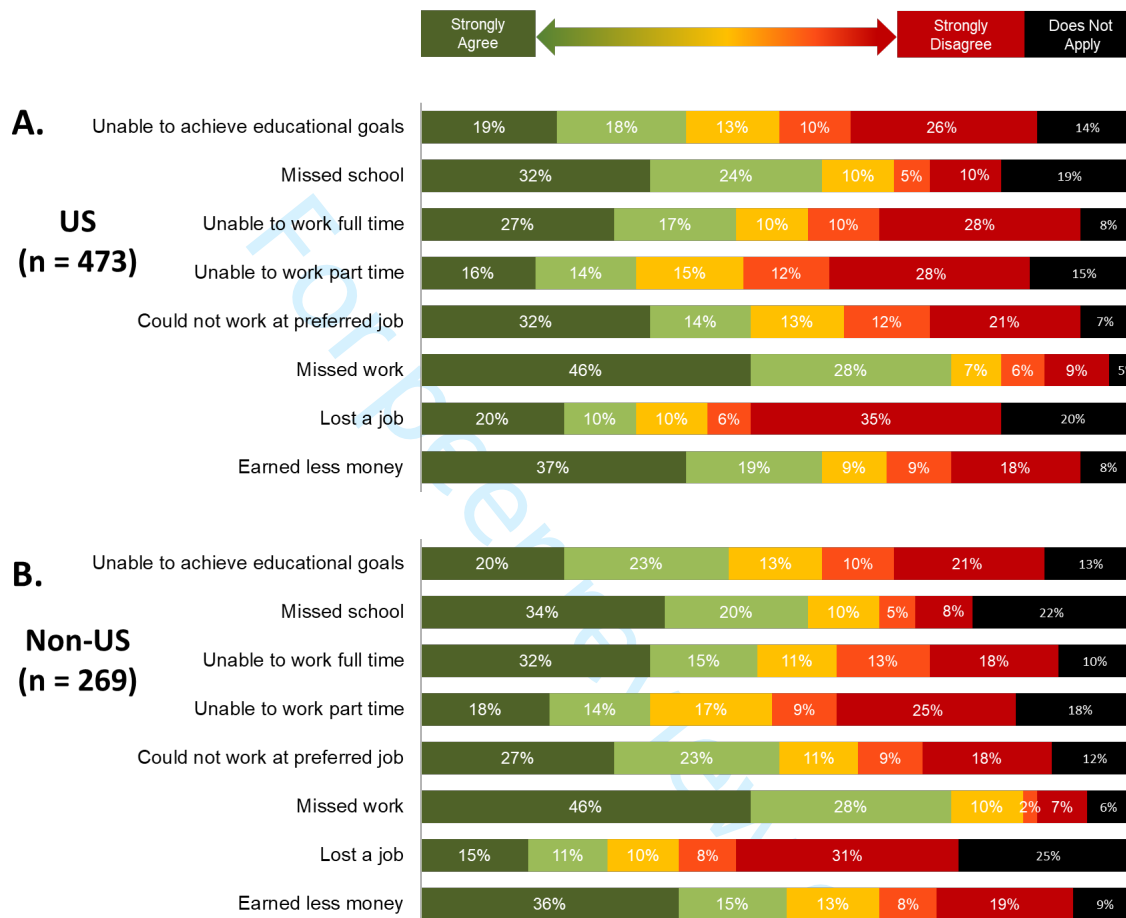

## Survey.

### MyEndometriosisTeam Survey – Life Course Impact Survey

#### Introduction

Part of our mission at MyEndometriosisTeam is to help build awareness and understanding of the impact that endometriosis can have on daily life. Creating a better understanding of what other women with endometriosis go through is important to many members. The aim of this study is to understand real-life experiences of women living with chronic endometriosis. This includes how it may influence life choices and any long-lasting effect it has.

This survey should take approximately 8 minutes to complete. Your participation is completely voluntary, and your responses are anonymous. MyEndometriosisTeam never shares any personally identifying information. Highlights of the findings of this research survey will be shared back with the MyEndometriosisTeam community. We are conducting this survey in collaboration with one of our pharmaceutical partners. This is one of the ways we keep MyEndometriosisTeam free while making sure your voice is heard. If you have any questions regarding the survey, please contact [support@myendometriosisteam.com](mailto:support@myendometriosisteam.com).

If you are 19 years of age or older, live in the United States (excluding Puerto Rico), understand the statements above and freely consent to participate in this research, click on the “Yes, I agree” button to begin the survey.

Yes, I agree

No thanks, I'd rather not participate

#### Section 1: Screening Questions

S1. Which of the following describes you?

Male (**Terminate**)

Female

1  
2  
3 S2. What is your age?  
4

5 Under 19 (**Terminate**)  
6

7 19-29  
8

9 30-39  
10

11 40-49  
12

13 50-59  
14

15 60 or older  
16  
17

18  
19 S3. Which one of the following best describes your condition?  
20

21 Stage 1 endometriosis  
22

23 Stage 2 endometriosis  
24

25 Stage 3 endometriosis  
26

27 Stage 4 endometriosis  
28

29 Not sure what stage of endometriosis I have  
30

31 I do not have endometriosis (**Terminate**)  
32  
33

34 S4. In which country do you currently live?  
35

36 United States (excluding Puerto Rico) (**Continue**)  
37

38 Australia  
39

40 Canada  
41

42 Ireland  
43

44 Netherlands  
45

46 New Zealand  
47

48 South Africa  
49

50 United Kingdom  
51

52 Other  
53  
54  
55

56 Section 1: Endometriosis Severity  
57  
58  
59

1. At what age did your endometriosis symptoms begin? (drop-down menu)
2. At approximately what age did you start your first period? (drop-down menu)
3. Thinking about when you first started to experience endometriosis symptoms, approximately how many years did it take before you were diagnosed with endometriosis? (drop-down menu)
4. Did you ever have a surgical procedure, such as a laparoscopy or laparotomy, to confirm you have endometriosis?
  - Yes
  - No
  - Not sure
5. Which one of the following best describes how often you typically feel some type of endometriosis-related pain?
  - Daily
  - A few times a week
  - Weekly
  - A few times a month
  - Monthly
  - Every few months
  - Once or twice a year
  - Never
6. Please rate how severe your endometriosis related pain has been at its worst in the last 12 months using a scale from 0 to 10, where 0=no pain and 10=worst imaginable pain. (Drop down menu).

- 1  
2  
3 7. Over the years, has your endometriosis related pain gotten better, gotten worse, or stayed  
4 the same?  
5  
6

7 Gotten much better

8 Gotten somewhat better

9 Stayed the same

10 Gotten somewhat worse

11 Gotten much worse  
12  
13  
14  
15  
16  
17  
18  
19

20 Section 2: Impact on Quality of Life and Life Choices

- 21  
22 8. Please indicate how much you agree or disagree with the following statements about the  
23 impact endometriosis has had **on your entire life up to now.**  
24  
25

26 (Rotate order)  
27  
28

29 **Because of my endometriosis:**  
30  
31  
32

| (Please select one box for each row)               | Strongly disagree | Some-what Disagr | Neutral | Some-what Agree | Strongly agree | Not Applic-able |
|----------------------------------------------------|-------------------|------------------|---------|-----------------|----------------|-----------------|
| I was unable to achieve my educational goals       | 1                 | 2                | 3       | 4               | 5              | 6               |
| I missed many days of school                       | 1                 | 2                | 3       | 4               | 5              | 6               |
| I was unable to work full time                     | 1                 | 2                | 3       | 4               | 5              | 6               |
| I was unable to work part time                     | 1                 | 2                | 3       | 4               | 5              | 6               |
| I could not work at the job I would have preferred | 1                 | 2                | 3       | 4               | 5              | 6               |
| I missed many days of work                         | 1                 | 2                | 3       | 4               | 5              | 6               |
| I lost a job                                       | 1                 | 2                | 3       | 4               | 5              | 6               |

|                                                                     |   |   |   |   |   |   |
|---------------------------------------------------------------------|---|---|---|---|---|---|
| I earned less money than I could have                               | 1 | 2 | 3 | 4 | 5 | 6 |
| I made fewer friends                                                | 1 | 2 | 3 | 4 | 5 | 6 |
| I have had problems with sexual or intimate relationships           | 1 | 2 | 3 | 4 | 5 | 6 |
| I have not dated or pursued an intimate relationship                | 1 | 2 | 3 | 4 | 5 | 6 |
| I have delayed having or have been unable to have children          | 1 | 2 | 3 | 4 | 5 | 6 |
| I have limited my social activities                                 | 1 | 2 | 3 | 4 | 5 | 6 |
| I have not exercised or played sports as much as I would have liked | 1 | 2 | 3 | 4 | 5 | 6 |
| I do not live where I would like due to my healthcare needs         | 1 | 2 | 3 | 4 | 5 | 6 |
| I lost a lot of time in my life                                     | 1 | 2 | 3 | 4 | 5 | 6 |
| I have travelled less than I would have liked                       | 1 | 2 | 3 | 4 | 5 | 6 |
| I have dressed differently than I would have liked                  | 1 | 2 | 3 | 4 | 5 | 6 |
| I have used alcohol, drugs or smoked cigarettes                     | 1 | 2 | 3 | 4 | 5 | 6 |
| I have not maintained a healthy diet                                | 1 | 2 | 3 | 4 | 5 | 6 |
| I have been less outgoing                                           | 1 | 2 | 3 | 4 | 5 | 6 |
| I have been less positive about the future                          | 1 | 2 | 3 | 4 | 5 | 6 |
| I have not reached my full potential in life                        | 1 | 2 | 3 | 4 | 5 | 6 |

9. What endometriosis-related experiences, if any, do you think have most contributed to altering your life potential in a negative way? Select all that apply. (Rotate order)



- 1
- 2
- 3
- 4 Painful sexual intercourse
- 5
- 6 Pelvic pain during my period
- 7
- 8 Pelvic pain apart from during my period
- 9
- 10 Painful periods
- 11
- 12 Heavy period-related bleeding
- 13
- 14 Other endometriosis related pain
- 15
- 16 Infertility
- 17
- 18 Depression or anxiety
- 19
- 20 Multiple surgeries
- 21
- 22 Prescription treatment to control endometriosis symptoms
- 23
- 24 Other symptoms or conditions (please specify)
- 25
- 26 Other (please specify)
- 27
- 28
- 29
- 30
- 31
- 32
- 33
- 34
- 35
- 36
- 37
- 38
- 39
- 40
- 41
- 42
- 43
- 44
- 45
- 46
- 47
- 48
- 49
- 50
- 51
- 52
- 53
- 54
- 55
- 56
- 57
- 58
- 59
- 60

- 1  
2  
3 10. Which, if any, of these, have you experienced as a result of your endometriosis? Check  
4 all that apply. (Rotate order)  
5  
6

7 Taken prescription medication for the pain (for example, opioids)

8 Taken prescription medication to treat depression or anxiety

9 Had multiple surgical procedures

10 Been hospitalized overnight

11 Gone to the emergency room

12 Received disability income due to being unable to work

13 Had a miscarriage (whether or not it was due to having endometriosis)

14 Had trouble performing daily tasks

15 Saw a mental health professional (eg., psychiatrist, counselor)

16 Was unable to get pregnant

17 Had a relationship end because I was unable to have children

18 Had a relationship end because I was unable to have sex

19 None of these  
20  
21  
22  
23  
24  
25  
26  
27  
28  
29  
30  
31  
32  
33  
34  
35  
36  
37  
38  
39  
40  
41  
42  
43  
44  
45  
46  
47  
48  
49  
50  
51  
52  
53  
54  
55  
56  
57  
58  
59  
60

- 1  
2  
3  
4  
5  
6  
7  
8  
9  
10  
11  
12  
13  
14  
15  
16  
17  
18  
19  
20  
21  
22  
23  
24  
25  
26  
27  
28  
29  
30  
31  
32  
33  
34  
35  
36  
37  
38  
39  
40  
41  
42  
43  
44  
45  
46  
47  
48  
49  
50  
51  
52  
53  
54  
55  
56  
57  
58  
59  
60
11. And which, if any, of these emotions, have you experienced as a result of your endometriosis? Check all that apply. (Rotate order)

**I have felt...**

Low self esteem

Judged by others

Inadequate

Unsexy

Insecure

Guilty

Determined

Strengthened

Hopeful

Embarrassed

Unfulfilled

Depressed

Anxious

None of these

For peer review only

- 1  
2  
3 12. Which of the following, if any, have you done to help manage the impact of endometriosis?  
4 Select all that apply. (rotate order)  
5

6  
7 Schedule social events around my period

8  
9 Engage with other women going through the same experiences

10  
11 Talk to my friends and family about endometriosis

12  
13 Talk to my spouse or partner about my endometriosis

14  
15 Pelvic floor or other exercises to lessen pain during sex

16  
17 Make sure my doctor listens and responds to my needs

18  
19 Educate myself on new treatments

20  
21 Use non-medical methods for controlling pain (e.g., ice or heat, lubricants during sex)

22  
23 Other (please describe)

24  
25 None of these

- 26  
27 13. Because of endometriosis, is there anything you feel you were unable to accomplish in  
28 your life? (open end)

- 29  
30 14. Is there anything else you would like us to know about the impact endometriosis has had  
31 on your life? (open end)  
32

33 Just a few last questions.  
34  
35  
36

- 37 D1. Which of the following best describes the area where you live?  
38  
39  
40

41 Urban

42 Suburban

43 Rural

44 Not sure / prefer not to say  
45  
46  
47  
48  
49  
50  
51  
52  
53  
54  
55  
56  
57  
58  
59  
60

1  
2  
3 D2. What is the highest level of education you have achieved?  
4  
5  
6

7 Less than high school

8 Some high school

9 High school or equivalent (e. g., GED)

10 Some college, but no degree

11 Associate degree

12 College degree (e.g., B.A., B.S.)

13 Some graduate school, but no degree

14 Graduate school (e.g., M.S., M.D., Ph.D.)

15 Prefer not to answer  
16  
17  
18  
19  
20  
21  
22  
23  
24

25 D3. What is your current employment status?  
26  
27

28 Working full time

29 Working part time

30 Unemployed, not looking for work

31 Unemployed, looking for work

32 Retired

33 Unable to work

34 Prefer not to answer  
35  
36  
37  
38  
39  
40  
41  
42  
43  
44  
45  
46  
47  
48  
49  
50  
51  
52  
53  
54  
55  
56  
57  
58  
59  
60

1  
2  
3 D4. Which of the following best describes your marital status?  
4  
5  
6

7 Single/never married

8 Married

9 Widowed

10 Divorced or separated

11 Prefer not to answer

12  
13  
14  
15  
16  
17  
18 (Skip D5 if “married” or “prefer not to answer” selected in D4)  
19  
20  
21

22 D5. Are you currently in an intimate relationship?  
23  
24  
25

26 Yes

27 No

28 Prefer not to answer  
29  
30  
31  
32

33 D6. How many children, if any, do you have?  
34  
35  
36  
37

38 None

39 1

40 2

41 3

42 4

43 5 or more

44 Prefer not to answer  
45  
46  
47  
48  
49  
50  
51

52 Thank you for answering these questions.  
53  
54  
55  
56  
57  
58  
59  
60

STROBE Statement—Checklist of items that should be included in reports of ***cross-sectional studies***

|                              | Item No | Recommendation                                                                                                                                                                       | Location in Manuscript                                                     |
|------------------------------|---------|--------------------------------------------------------------------------------------------------------------------------------------------------------------------------------------|----------------------------------------------------------------------------|
| <b>Title and abstract</b>    | 1       | (a) Indicate the study's design with a commonly used term in the title or the abstract                                                                                               | Page 1, lines 1-2                                                          |
|                              |         | (b) Provide in the abstract an informative and balanced summary of what was done and what was found                                                                                  | Page 3, lines 1-22; page 4, lines 1-5                                      |
| <b>Introduction</b>          |         |                                                                                                                                                                                      |                                                                            |
| Background/rationale         | 2       | Explain the scientific background and rationale for the investigation being reported                                                                                                 | Page 5, lines 1-23; page 6, lines 1-18                                     |
| Objectives                   | 3       | State specific objectives, including any prespecified hypotheses                                                                                                                     | Page 7, lines 1-11                                                         |
| <b>Methods</b>               |         |                                                                                                                                                                                      |                                                                            |
| Study design                 | 4       | Present key elements of study design early in the paper                                                                                                                              | Page 7, lines 19-21; page 8, lines 1-23; page 9, lines 1-17                |
| Setting                      | 5       | Describe the setting, locations, and relevant dates, including periods of recruitment, exposure, follow-up, and data collection                                                      | Page 8, lines 4-5; page 9, lines 11-17                                     |
| Participants                 | 6       | (a) Give the eligibility criteria, and the sources and methods of selection of participants                                                                                          | Page 9, lines 11-17                                                        |
| Variables                    | 7       | Clearly define all outcomes, exposures, predictors, potential confounders, and effect modifiers. Give diagnostic criteria, if applicable                                             | N/A                                                                        |
| Data sources/<br>measurement | 8*      | For each variable of interest, give sources of data and details of methods of assessment (measurement). Describe comparability of assessment methods if there is more than one group | Page 7, lines 20-21; page 8, lines 1-23; supporting information pages 7-17 |
| Bias                         | 9       | Describe any efforts to address potential sources of bias                                                                                                                            | Page 8, lines 17-18; page 9, lines 16-17                                   |
| Study size                   | 10      | Explain how the study size was arrived at                                                                                                                                            | Page 9, lines 5-6 and 11-16                                                |
| Quantitative variables       | 11      | Explain how quantitative variables were handled in the analyses. If applicable, describe which groupings were chosen and why                                                         | Page 9, lines 19-20; page 10, lines 1-8                                    |

|    |                     |     |                                                                                                                                                                                                              |                                                                           |
|----|---------------------|-----|--------------------------------------------------------------------------------------------------------------------------------------------------------------------------------------------------------------|---------------------------------------------------------------------------|
| 1  |                     |     |                                                                                                                                                                                                              |                                                                           |
| 2  | Statistical methods | 12  | (a) Describe all statistical methods, including those used to control for confounding                                                                                                                        | Page 9, lines 19-20                                                       |
| 3  |                     |     | (b) Describe any methods used to examine subgroups and interactions                                                                                                                                          | Page 9, lines 19-20; page 10, lines 1-8                                   |
| 4  |                     |     | (c) Explain how missing data were addressed                                                                                                                                                                  | Page 8, lines 22-23                                                       |
| 5  |                     |     | (d) If applicable, describe analytical methods taking account of sampling strategy                                                                                                                           | N/A                                                                       |
| 6  |                     |     | (e) Describe any sensitivity analyses                                                                                                                                                                        | N/A                                                                       |
| 7  |                     |     |                                                                                                                                                                                                              |                                                                           |
| 8  |                     |     |                                                                                                                                                                                                              |                                                                           |
| 9  |                     |     |                                                                                                                                                                                                              |                                                                           |
| 10 |                     |     |                                                                                                                                                                                                              |                                                                           |
| 11 |                     |     |                                                                                                                                                                                                              |                                                                           |
| 12 | <b>Results</b>      |     |                                                                                                                                                                                                              |                                                                           |
| 13 |                     |     |                                                                                                                                                                                                              |                                                                           |
| 14 | Participants        | 13* | (a) Report numbers of individuals at each stage of study—eg numbers potentially eligible, examined for eligibility, confirmed eligible, included in the study, completing follow-up, and analysed            | Page 10, lines 11-12                                                      |
| 15 |                     |     | (b) Give reasons for non-participation at each stage                                                                                                                                                         | N/A                                                                       |
| 16 |                     |     | (c) Consider use of a flow diagram                                                                                                                                                                           | N/A                                                                       |
| 17 |                     |     |                                                                                                                                                                                                              |                                                                           |
| 18 |                     |     |                                                                                                                                                                                                              |                                                                           |
| 19 |                     |     |                                                                                                                                                                                                              |                                                                           |
| 20 |                     |     |                                                                                                                                                                                                              |                                                                           |
| 21 | Descriptive data    | 14* | (a) Give characteristics of study participants (eg demographic, clinical, social) and information on exposures and potential confounders                                                                     | Page 10, lines 13-21; page 11, Table 1                                    |
| 22 |                     |     | (b) Indicate number of participants with missing data for each variable of interest                                                                                                                          | N/A (no missing data; see page 8, lines 22-23)                            |
| 23 |                     |     |                                                                                                                                                                                                              |                                                                           |
| 24 |                     |     |                                                                                                                                                                                                              |                                                                           |
| 25 |                     |     |                                                                                                                                                                                                              |                                                                           |
| 26 |                     |     |                                                                                                                                                                                                              |                                                                           |
| 27 | Outcome data        | 15* | Report numbers of outcome events or summary measures                                                                                                                                                         | Pages 12-14; page 15, lines 1-7; Figures 1-2                              |
| 28 |                     |     |                                                                                                                                                                                                              |                                                                           |
| 29 |                     |     |                                                                                                                                                                                                              |                                                                           |
| 30 | Main results        | 16  | (a) Give unadjusted estimates and, if applicable, confounder-adjusted estimates and their precision (eg, 95% confidence interval). Make clear which confounders were adjusted for and why they were included | N/A                                                                       |
| 31 |                     |     | (b) Report category boundaries when continuous variables were categorized                                                                                                                                    | N/A                                                                       |
| 32 |                     |     | (c) If relevant, consider translating estimates of relative risk into absolute risk for a meaningful time period                                                                                             | N/A                                                                       |
| 33 |                     |     |                                                                                                                                                                                                              |                                                                           |
| 34 |                     |     |                                                                                                                                                                                                              |                                                                           |
| 35 |                     |     |                                                                                                                                                                                                              |                                                                           |
| 36 |                     |     |                                                                                                                                                                                                              |                                                                           |
| 37 |                     |     |                                                                                                                                                                                                              |                                                                           |
| 38 | Other analyses      | 17  | Report other analyses done—eg analyses of subgroups and interactions, and sensitivity analyses                                                                                                               | Page 15, lines 8-23; page 16, lines 1-5; supporting information pages 2-6 |
| 39 |                     |     |                                                                                                                                                                                                              |                                                                           |
| 40 |                     |     |                                                                                                                                                                                                              |                                                                           |
| 41 |                     |     |                                                                                                                                                                                                              |                                                                           |
| 42 |                     |     |                                                                                                                                                                                                              |                                                                           |
| 43 |                     |     |                                                                                                                                                                                                              |                                                                           |
| 44 |                     |     |                                                                                                                                                                                                              |                                                                           |
| 45 |                     |     |                                                                                                                                                                                                              |                                                                           |
| 46 |                     |     |                                                                                                                                                                                                              |                                                                           |



1  
2  
3  
4  
5  
6  
7  
8  
9  
10  
11  
12  
13  
14  
15  
16  
17  
18  
19  
20  
21  
22  
23  
24  
25  
26  
27  
28  
29  
30  
31  
32  
33  
34  
35  
36  
37  
38  
39  
40  
41  
42  
43  
44  
45  
46

---

**Discussion**

|                  |    |                                                                                                                                                                            |                                                               |
|------------------|----|----------------------------------------------------------------------------------------------------------------------------------------------------------------------------|---------------------------------------------------------------|
| Key results      | 18 | Summarise key results with reference to study objectives                                                                                                                   | Page 16, lines 8-14; page 23, lines 1-5                       |
| Limitations      | 19 | Discuss limitations of the study, taking into account sources of potential bias or imprecision. Discuss both direction and magnitude of any potential bias                 | Page 4, lines 14-18; page 21, lines 19-24; page 22, lines 1-5 |
| Interpretation   | 20 | Give a cautious overall interpretation of results considering objectives, limitations, multiplicity of analyses, results from similar studies, and other relevant evidence | Page 16, lines 16-23; pages 17-22                             |
| Generalisability | 21 | Discuss the generalisability (external validity) of the study results                                                                                                      | Page 21, lines 1-17; page 22, lines 7-22; page 23, lines 1-5  |

---

**Other information**

|         |    |                                                                                                                                                               |                      |
|---------|----|---------------------------------------------------------------------------------------------------------------------------------------------------------------|----------------------|
| Funding | 22 | Give the source of funding and the role of the funders for the present study and, if applicable, for the original study on which the present article is based | Page 24, lines 11-12 |
|---------|----|---------------------------------------------------------------------------------------------------------------------------------------------------------------|----------------------|

---

\*Give information separately for exposed and unexposed groups.

**Note:** An Explanation and Elaboration article discusses each checklist item and gives methodological background and published examples of transparent reporting. The STROBE checklist is best used in conjunction with this article (freely available on the Web sites of PLoS Medicine at <http://www.plosmedicine.org/>, Annals of Internal Medicine at <http://www.annals.org/>, and Epidemiology at <http://www.epidem.com/>). Information on the STROBE Initiative is available at [www.strobe-statement.org](http://www.strobe-statement.org).

# BMJ Open

## The impact of endometriosis on women's life decisions and goal attainment: a cross-sectional survey of members of an online patient community

|                                 |                                                                                                                                                                                                                                                                                                                                                                                                                                                                                                                                                                                                                                     |
|---------------------------------|-------------------------------------------------------------------------------------------------------------------------------------------------------------------------------------------------------------------------------------------------------------------------------------------------------------------------------------------------------------------------------------------------------------------------------------------------------------------------------------------------------------------------------------------------------------------------------------------------------------------------------------|
| Journal:                        | <i>BMJ Open</i>                                                                                                                                                                                                                                                                                                                                                                                                                                                                                                                                                                                                                     |
| Manuscript ID                   | bmjopen-2021-052765.R3                                                                                                                                                                                                                                                                                                                                                                                                                                                                                                                                                                                                              |
| Article Type:                   | Original research                                                                                                                                                                                                                                                                                                                                                                                                                                                                                                                                                                                                                   |
| Date Submitted by the Author:   | 25-Mar-2022                                                                                                                                                                                                                                                                                                                                                                                                                                                                                                                                                                                                                         |
| Complete List of Authors:       | Missmer, Stacey A.; Michigan State University College of Human Medicine; Harvard University T H Chan School of Public Health<br>Fitzpatrick, Katherine; JB Ashtin, Tu, Frank; NorthShore University HealthSystem; University of Chicago Pritzker School of Medicine<br>Soliman, Ahmed M.; AbbVie Inc<br>Chiuve, Stephanie; AbbVie Inc<br>Cross, Sarah; AbbVie Inc<br>Eichner, Samantha; AbbVie Inc<br>Antunez Flores, Oscar; AbbVie Inc<br>Horne, Andrew; The University of Edinburgh MRC Centre for Reproductive Health,<br>Schneider, Beth; MyHealthTeams<br>As-Sanie, Sawsan; University of Michigan, Obstetrics and Gynaecology |
| <b>Primary Subject Heading</b>: | Obstetrics and gynaecology                                                                                                                                                                                                                                                                                                                                                                                                                                                                                                                                                                                                          |
| Secondary Subject Heading:      | Obstetrics and gynaecology, Qualitative research                                                                                                                                                                                                                                                                                                                                                                                                                                                                                                                                                                                    |
| Keywords:                       | GYNAECOLOGY, Community gynaecology < GYNAECOLOGY, QUALITATIVE RESEARCH                                                                                                                                                                                                                                                                                                                                                                                                                                                                                                                                                              |
|                                 |                                                                                                                                                                                                                                                                                                                                                                                                                                                                                                                                                                                                                                     |

SCHOLARONE™  
Manuscripts



I, the Submitting Author has the right to grant and does grant on behalf of all authors of the Work (as defined in the below author licence), an exclusive licence and/or a non-exclusive licence for contributions from authors who are: i) UK Crown employees; ii) where BMJ has agreed a CC-BY licence shall apply, and/or iii) in accordance with the terms applicable for US Federal Government officers or employees acting as part of their official duties; on a worldwide, perpetual, irrevocable, royalty-free basis to BMJ Publishing Group Ltd ("BMJ") its licensees and where the relevant Journal is co-owned by BMJ to the co-owners of the Journal, to publish the Work in this journal and any other BMJ products and to exploit all rights, as set out in our [licence](#).

The Submitting Author accepts and understands that any supply made under these terms is made by BMJ to the Submitting Author unless you are acting as an employee on behalf of your employer or a postgraduate student of an affiliated institution which is paying any applicable article publishing charge ("APC") for Open Access articles. Where the Submitting Author wishes to make the Work available on an Open Access basis (and intends to pay the relevant APC), the terms of reuse of such Open Access shall be governed by a Creative Commons licence – details of these licences and which [Creative Commons](#) licence will apply to this Work are set out in our licence referred to above.

Other than as permitted in any relevant BMJ Author's Self Archiving Policies, I confirm this Work has not been accepted for publication elsewhere, is not being considered for publication elsewhere and does not duplicate material already published. I confirm all authors consent to publication of this Work and authorise the granting of this licence.

1  
2  
3 1 **The impact of endometriosis on women's life decisions and goal attainment: a cross-**  
4  
5 2 **sectional survey of members of an online patient community**  
6  
7

8  
9 3 Stacey A Missmer,<sup>1</sup> Frank F Tu,<sup>2</sup> Ahmed M Soliman,<sup>3</sup> Stephanie E Chiuve,<sup>3</sup> Sarah Cross,<sup>3</sup>  
10  
11 4 Samantha Eichner,<sup>3</sup> Oscar Antunez Flores,<sup>3</sup> Andrew W Horne,<sup>4</sup> Beth Schneider,<sup>5</sup> Sawsan As-  
12  
13 5 Sanie<sup>6</sup>  
14  
15

16  
17 6 <sup>1</sup>Department of Epidemiology, Harvard T. H. Chan School of Public Health; and Boston Center  
18  
19 7 for Endometriosis, Boston, Massachusetts, USA, and Department of Obstetrics, Gynecology,  
20  
21 8 and Reproductive Biology, Michigan State University, Grand Rapids, Michigan, USA;

22  
23 9 <sup>2</sup>Department of Obstetrics and Gynecology, NorthShore University Health System and Pritzker  
24  
25 10 School of Medicine, University of Chicago, Evanston, Illinois, USA; <sup>3</sup>AbbVie Inc, North Chicago,  
26  
27 11 Illinois, USA; <sup>4</sup>Medical Research Council Centre for Reproductive Health, University of  
28  
29 12 Edinburgh, Edinburgh, UK; <sup>5</sup>MyHealthTeams, San Francisco, California, USA; <sup>6</sup>Department of  
30  
31 13 Obstetrics and Gynecology, University of Michigan, Ann Arbor, Michigan, USA.  
32  
33  
34

35  
36 14 **Word Count:** 4506 words  
37  
38

39  
40 15 **Keywords:** Gynaecology; Community Gynaecology; Endometriosis; Survey; Patient Online  
41  
42 16 Communities  
43  
44  
45

46  
47 17  
48  
49  
50

51 18  
52

53 19  
54

55 20  
56  
57  
58  
59  
60

1  
2  
3  
4  
5  
6  
7  
8  
9  
10  
11  
12  
13  
14  
15  
16  
17  
18  
19  
20  
21  
22  
23  
24  
25  
26  
27  
28  
29  
30  
31  
32  
33  
34  
35  
36  
37  
38  
39  
40  
41  
42  
43  
44  
45  
46  
47  
48  
49  
50  
51  
52  
53  
54  
55  
56  
57  
58  
59  
60

1  
2  
3  
4  
5  
6  
7  
8  
9  
10

**Correspondence to**

Dr Stacey A Missmer

Professor of Obstetrics, Gynecology, and Reproductive Biology

Michigan State University College of Human Medicine

15 Michigan Street NE

Grand Rapids, MI 49503

Phone: 616-234-2705

Email: [stacey.missmer@channing.harvard.edu](mailto:stacey.missmer@channing.harvard.edu)

## 1 ABSTRACT

2  
3  
4  
5  
6  
7  
8 **Objectives:** To examine women's perceptions of endometriosis-associated disease burden and  
9  
10 its impact on life decisions and goal attainment.

11  
12  
13  
14  
15 **Design:** An anonymous online survey was distributed in October 2018 through the social media  
16  
17 network MyEndometriosisTeam.com.

18  
19  
20  
21  
22 **Participants:** Women aged 19 years and older living in several English-speaking countries who  
23  
24 self-identified as having endometriosis.

25  
26  
27  
28  
29  
30  
31  
32 **Outcome measures:** Patients' perspectives on how endometriosis has affected their work,  
33  
34 education, relationships, overall life decisions, and attainment of goals. Subanalyses were  
35  
36 performed for women who identified as "less positive about the future" (LPAF) or had "not  
37  
38 reached their full potential" (NRFP) due to endometriosis.

39  
40  
41  
42  
43  
44  
45  
46  
47  
48  
49  
50  
51  
52  
53  
54  
55  
56  
57  
58  
59  
60  
**Results:** 743 women completed the survey. Women reported high levels of pain when pain was  
at its worst (mean score, 8.9 on severity scale of 0 [no pain] to 10 [worst imaginable pain]) and  
most (56%, n=415) experienced pain daily. Women reported other negative experiences  
attributed to endometriosis, including emergency department visits (66%, n=485), multiple  
surgeries (55%, n=406), and prescription treatments for symptoms of endometriosis (72%,  
n=529). Women indicated that they believed endometriosis had a negative impact on their  
educational and professional achievements, social lives/relationships, and overall physical  
health. Most women "somewhat agreed"/"strongly agreed" that endometriosis caused them to  
lose time in life (81%, n=601), feel LPAF (80%, n=589), and feel they had NRFP (75%, n=556).  
Women who identified as LPAF or NRFP generally reported more negative experiences than  
those who were non-LPAF or non-NRFP.

1  
2  
3 1 **Conclusions:** Women who completed this survey reported pain and negative experiences  
4  
5 2 related to endometriosis that were perceived to negatively impact major life-course decisions  
6  
7 3 and attainment of goals. Greater practitioner awareness of the impact that endometriosis has on  
8  
9 4 a woman's life course and the importance of meaningful dialogue with patients may be  
10  
11 5 important for improving long-term management of the disease and help identify women who are  
12  
13 6 most vulnerable.

14  
15  
16  
17 7 **Abstract Word Count:** 298 (300 word maximum)

18  
19  
20  
21 8 **Strengths and limitations of this study**

- 22  
23  
24 9 • A strength of our study is use of a quantitative survey with a meaningful sample size and  
25  
26 10 sample population that spanned multiple countries.
- 27  
28 11 • This study is strengthened by targeted research questions developed based on existing  
29  
30 12 conversations on a social network platform.
- 31  
32 13 • Another strength of this study is the use of a social network familiar to patients,  
33  
34 14 facilitating honesty in responses to sensitive topics.
- 35  
36 15 • An important limitation of our study is possible self-selection bias due to voluntary  
37  
38 16 participation in an online community and no targeted sampling; quantitative data may  
39  
40 17 therefore not be generalizable to all women with endometriosis.
- 41  
42 18 • The study is limited by self-reported patient responses that were not confirmed by  
43  
44 19 medical records or other complementary data.
- 45  
46  
47  
48  
49  
50  
51  
52  
53  
54  
55  
56  
57  
58  
59  
60

## 1 INTRODUCTION

2 Endometriosis is an often chronic gynecologic disorder that impacts 10% of women of  
3 reproductive age.<sup>1</sup> Endometrial-like tissue thriving outside the uterus leads to local and systemic  
4 inflammation that can result in a wide range of life-impacting effects, including pelvic pain,  
5 dysmenorrhea, dyspareunia, and infertility.<sup>2-4</sup> These debilitating effects have an immense impact  
6 on a patient's quality of life and overall well-being.<sup>5,6</sup> For example, symptoms of endometriosis  
7 may have a negative impact on women's psychological health,<sup>7,8</sup> strain social and intimate  
8 relationships,<sup>5,9-11</sup> and lead to losses in productivity, both at home and in the workplace.<sup>12</sup> These  
9 issues have been further exacerbated by the COVID-19 pandemic, which has led to reduced  
10 access to medical care, delayed treatments, increased stress, loss of work productivity, and  
11 mandated self-isolation.<sup>13,14</sup>

12 Outside the physical and emotional toll, the collective symptoms of endometriosis are also  
13 associated with direct and indirect costs that are burdensome to patients. Visits to physicians  
14 and emergency departments, pharmacy claims, and other direct expenses are estimated to cost  
15 between \$12,000 to \$15,000 per patient per year in the United States, and the loss of work and  
16 productivity may amount to additional losses of thousands of dollars per patient.<sup>12,15-18</sup>

17 Most studies examining chronic diseases like endometriosis focus on one or two specific areas  
18 of the disease, such as its social, physical, or psychological impact at a specific point in  
19 time.<sup>19,20</sup> In contrast, few studies have examined the impact of endometriosis on a woman's life  
20 course (ie, "life-course impairment") based on how symptoms and experiences resulting from  
21 the disease influence major life events and decisions (such as whether to pursue educational  
22 opportunities, choose a career path, establish intimate relationships, and plan for a family) and  
23 the overall ability of patients to attain their life goals.<sup>19,20</sup> The few existing studies have small



1 sample sizes or are qualitative, relying on informational interviews to ascertain the life-course  
2 impact of the disease, but highlight the substantial impacts that endometriosis can have on  
3 social activities, intimate relationships, education, work productivity, and psychological well-  
4 being.<sup>11,21-23</sup> Understanding life-course impairment, as opposed to focusing on the symptoms of  
5 the disease (such as pain or infertility, which are most often addressed individually not  
6 holistically), is vital because of the complicated interrelationship among symptoms and their  
7 downstream effects. Individual symptoms can influence critical life decisions (eg, work,  
8 education, or personal relationships) in ways that are interrelated and can impact other areas of  
9 a patient's life. For example, chronic pain may influence the type and amount of work performed  
10 or whether a patient decides to work at all, which, in turn, can have financial implications on the  
11 patient's lifestyle, family, relationships, or sense of personal fulfillment.<sup>19,20</sup> Symptoms may  
12 determine where a patient chooses to live because of financial considerations, healthcare  
13 access, or proximity to support networks. Similarly, dyspareunia related to endometriosis may  
14 lead some women to avoid intimate relationships, which may have downstream implications for  
15 marriage, family planning, and mental and emotional health.<sup>24,25</sup> Cumulatively, persistent  
16 symptoms of endometriosis and their impact on daily activities and family and intimate  
17 relationships can negatively impact the trajectory of women's lives and are profound and far-  
18 reaching.

1 The objective of this multinational survey was to gain a better understanding of patient  
2 perspectives on how endometriosis impacts their daily activities and identify how the disease  
3 may influence women's major life decisions and attainment of their goals. In addition, we sought  
4 to understand the endometriosis-related life-course impacts specifically in women who reported  
5 low optimism or low goal attainment by investigating the specific reasons for life-course  
6 impairment among the subset of women who felt their lives were most negatively impacted by  
7 endometriosis. Insights into a patient's complete experience with endometriosis are needed to  
8 develop and provide access to effective treatments to reduce the negative impacts of  
9 endometriosis on a woman's life course. Greater awareness of the potential negative life-course  
10 impacts of endometriosis is important for helping physicians to identify and understand patients'  
11 needs and improve the long-term management of endometriosis.

## 12 **METHODS**

### 13 **Ethics approval**

14 The Advarra Institutional Review Board (Columbia, MD, USA) reviewed the cross-sectional  
15 survey for participants in the United States and determined that informed consent was not  
16 required (exempt determination #Pro00029982, 26 September 2018). However, participants did  
17 consent to participate in a survey and email invitations were provided to people who opted to  
18 receive communications.

### 19 **Survey development**

20 An online survey was created in a collaborative effort between AbbVie (North Chicago, IL, USA)  
21 and MyHealthTeams (San Francisco, CA, USA), a company that creates social networks for

1  
2  
3 1 communities of individuals living with chronic conditions to foster discussion and provide support  
4  
5 2 among people facing similar circumstances. The survey was programmed and administered  
6  
7 3 through Qualtrics, an online survey tool that allows users to capture survey responses in an  
8  
9 4 anonymized manner. The survey was provided in English and was available online on the social  
10  
11 5 media network website MyEndometriosisTeam.com from October 3 through October 25, 2018.  
12  
13 6 The 14 survey questions about women's experiences with endometriosis were based on our  
14  
15 7 knowledge about the disease state, existing publications, and online conversations participants  
16  
17 8 were having (see 'Patient and public involvement' for further detail). In addition, the survey  
18  
19 9 contained 4 screening questions and 6 demographic questions (identified as Supporting  
20  
21 10 Information). The primary goal of the survey was to capture patients' perspectives on the  
22  
23 11 negative impacts of endometriosis on different aspects of their life courses, including how  
24  
25 12 endometriosis has affected their work, education, relationships, overall life decisions, and  
26  
27 13 attainment of goals. This portion of the survey was modeled after a validated instrument created  
28  
29 14 to measure life-course impact of disease in patients with psoriasis.<sup>25</sup> This tool was used as a  
30  
31 15 starting point for model development as it has been validated for another chronic disease with  
32  
33 16 excess psychological and psychosocial burden, has been used clinically, and was published in  
34  
35 17 the scientific literature. Survey questions were rotated to avoid any bias introduced by order of  
36  
37 18 answer selections. Most survey questions were closed-ended and provided multiple-choice  
38  
39 19 options to participants; two questions were open-ended and allowed participants to provide  
40  
41 20 written responses detailing any life accomplishments they believed were impeded by  
42  
43 21 endometriosis or to offer anything else they wanted to share about the impact of endometriosis  
44  
45 22 on their lives. Responses were required for all closed-ended questions; therefore, no  
46  
47 23 imputations for missing data were required. The survey used in this study is included in the  
48  
49 24 supplementary material.

## 55 56 **Patient and public involvement**

1 Survey questions were developed based on reviewing conversations members were having on  
2 MyEndometriosisTeam.com to ensure both relevance of topics and patient-focused language.  
3 The social media network, MyEndometriosisTeam.com, was developed for women living with  
4 endometriosis and consists of more than 108,000 members across 13 countries. Based on  
5 institutional review board exemption requirements, people were asked at the beginning of the  
6 survey if they agreed to participate, and email invitations were sent only to those people who  
7 opted into receiving communications.

## 8 **Participant eligibility and recruitment**

9 Members of the social network MyEndometriosisTeam.com were recruited through 33,000 email  
10 invitations. Invitations posted on the public Facebook page for MyEndometriosisTeam recruited  
11 additional women to participate in the survey, which was live on the MyEndometriosisTeam.com  
12 website from October 3 to October 25, 2018. The English-language survey was conducted  
13 among an international population of women who were at least 19 years of age and who self-  
14 identified as having endometriosis. The survey was anonymous, and answers could not be  
15 linked to individual members.

## 16 **Survey analysis**

17 Descriptive statistics were used to tabulate survey responses in this cross-sectional study. After  
18 descriptive statistics were quantified for all respondents, a subanalysis was performed that  
19 restricted the survey responder population to women who “somewhat agreed” or “strongly  
20 agreed” that they were “less positive about the future” (LPAF) or that they “had not reached their  
21 full potential” (NRFP) because of endometriosis. These two questions were selected for this  
22 subanalysis to focus on the life-course impact attributed to endometriosis as identified by those

**Table 1** Demographics and burden of endometriosis

| <b>Characteristic</b> | <b>Overall Respondents, n (%) (N=743)</b> | <b>LPAF Respondents, n (%) (N=589)</b> | <b>NRFP Respondents, n (%) (N=556)</b> |
|-----------------------|-------------------------------------------|----------------------------------------|----------------------------------------|
|-----------------------|-------------------------------------------|----------------------------------------|----------------------------------------|

1 who reported low optimism or low goal attainment. For this analysis, life-course impairment was  
 2 defined as respondents who “somewhat agreed” or “strongly agreed” that endometriosis had  
 3 negatively impacted their education, employment, relationships, social activities, and physical  
 4 and emotional well-being.

## 5 RESULTS

### 6 Survey response and demographics

7 A total of 743 women completed the survey (table 1), which was live from October 3 to October  
 8 25, 2018.

9 Among respondents to the English-language survey, 474 (64%) were from the United States,  
 10 and 269 (36%) were from other countries, including one-fifth from the United Kingdom (17%,  
 11 n=128), and one-fifth summed from Canada, Australia, South Africa, Ireland, New Zealand, and  
 12 The Netherlands (table 1). Most women (73%, n=542) were younger than 40 years of age.  
 13 Almost half of the respondents (48%, n=355) were unaware of their stage of endometriosis  
 14 (according to the rASRM scoring system), which was obtained at their most recent surgery.  
 15 Among the 52% of respondents who recalled their rASRM score, most (57%, n=223) reported  
 16 having stage 4 endometriosis (table 1). Baseline demographics were generally comparable  
 17 between the overall study population and women who identified as LFAP or NRFP (table 1).

|                                                     |          |          |          |
|-----------------------------------------------------|----------|----------|----------|
| Age at time of survey, years                        |          |          |          |
| 19–29                                               | 206 (28) | 179 (30) | 155 (28) |
| 30–39                                               | 339 (46) | 269 (46) | 259 (47) |
| 40–49                                               | 180 (24) | 128 (22) | 129 (23) |
| 50 or older                                         | 18 (2)   | 13 (2)   | 13 (2)   |
| Country                                             |          |          |          |
| United States (excluding Puerto Rico <sup>a</sup> ) | 474 (64) | 370 (63) | 364 (65) |
| United Kingdom                                      | 128 (17) | 102 (17) | 92 (17)  |
| Canada                                              | 38 (5)   | 32 (5)   | 30 (5)   |
| Australia                                           | 37 (5)   | 31 (5)   | 27 (5)   |
| South Africa                                        | 20 (3)   | 15 (3)   | 9 (2)    |
| Ireland                                             | 17 (2)   | 15 (3)   | 12 (2)   |
| Other                                               | 15 (2)   | 12 (2)   | 13 (2)   |
| New Zealand                                         | 11 (1)   | 9 (2)    | 8 (1)    |
| The Netherlands                                     | 3 (0.4)  | 3 (1)    | 1 (<0.1) |
| Level of education                                  |          |          |          |
| Some high school or less                            | 33 (4)   | 21 (4)   | 20 (4)   |
| High school diploma                                 | 111 (15) | 80 (14)  | 76 (14)  |
| Some college                                        | 214 (29) | 164 (28) | 176 (32) |
| College degree                                      | 254 (34) | 129 (22) | 113 (20) |
| Graduate school/degree                              | 111 (15) | 59 (10)  | 50 (9)   |
| Prefer not to answer                                | 20 (3)   | 15 (3)   | 10 (2)   |
| Endometriosis stage                                 |          |          |          |
| Stage 1                                             | 33 (4)   | 24 (4)   | 22 (4)   |
| Stage 2                                             | 39 (5)   | 28 (5)   | 29 (5)   |
| Stage 3                                             | 93 (13)  | 70 (12)  | 73 (13)  |
| Stage 4                                             | 223 (30) | 191 (32) | 171 (31) |
| Not sure                                            | 355 (48) | 276 (47) | 261 (47) |
| Method of diagnosis                                 |          |          |          |
| Laparoscopic surgery                                | 650 (87) | 518 (88) | 494 (89) |
| Clinical only                                       | 87 (12)  | 66 (11)  | 57 (10)  |
| Not sure                                            | 6 (0.8)  | 5 (1)    | 5 (1)    |

<sup>a</sup>Patients from Puerto Rico were separated from the United States population into the “other” category due to IRB exemption qualifications that were different for residents of Puerto Rico versus residents of the 50 states of the United States.

## 1 **Diagnosis and symptoms**

### 2 *Diagnosis*

3 Women began experiencing symptoms of endometriosis at a young age, with many  
4 experiencing symptoms by age 15. Most women (74%, n=549) reported having a diagnosis of  
5 endometriosis made more than 3 years after the appearance of symptoms (average delay of  
6 approximately 9 years). Nearly half of women (42%, n=313) said it took 10 years or longer after  
7 the initial onset of their symptoms to receive a surgical or clinical diagnosis of endometriosis.  
8 The younger the woman's age at symptom onset, the longer the delay; it took, on average, 13  
9 years to reach a surgical diagnosis for women who began experiencing symptoms by age 13.  
10 Most women (87%, n=650) reported their diagnosis had been confirmed by laparoscopy  
11 (table 1).

### 12 *Endometriosis-associated pain*

13 Most women (56%, n=415) reported experiencing pain daily and nearly an additional one-  
14 quarter of them reported feeling endometriosis-associated pain a few times per week. When  
15 asked to rate how severe their pain was in the last 12 months on a scale from 0 (no pain) to 10  
16 (worst imaginable pain), more than half of the respondents (54%) rated their worst pain within  
17 the last 12 months as a 9 or 10. About two-thirds of women reported their endometriosis-  
18 associated pain had worsened over the years when asked if endometriosis-related pain had  
19 gotten better, worse, or stayed the same.

## 20 **Life-course impairment**

### 21 *Education and employment potential*

1 Many of the women surveyed said they “somewhat agreed” or “strongly agreed” that they had  
2 experienced difficulties achieving their educational goals (40%, n=290) or had missed school  
3 (55%, n=413) because of endometriosis-associated symptoms (figure 1A). Almost half of  
4 participants (45%, n=338) “somewhat agreed” or “strongly agreed” that they could not work full  
5 time, and a similar percentage (47%, n=355) reported not working at a job they would have  
6 preferred. Most reported that they had missed work (74%, n=550) or earned less money than  
7 they could have (54%, n=404) because of endometriosis-associated symptoms. These findings  
8 were consistent among patients in the United States compared with the rest of the world  
9 (supporting information figure 1).

#### 10 *Relationships and social engagements*

11 Most women “somewhat agreed” or “strongly agreed” that endometriosis-associated symptoms  
12 led to problems in their intimate relationships (83%, n=613) and/or created a barrier to starting a  
13 family (58%, n=431). Most women similarly believed that endometriosis-associated symptoms  
14 had led them to limit their social activities (82%, n=609), made them less outgoing (81%,  
15 n=602), and caused them to travel less (59%, n=434) (figure 1B).

#### 16 *Physical well-being*

17 Most women “somewhat agreed” or “strongly agreed” endometriosis limited their ability to stay  
18 active (79%, n=588) and maintain a healthy diet (55%, n=406) (figure 1C). A high proportion of  
19 women (43%, n=323) perceived that endometriosis-associated symptoms resulted in use of  
20 alcohol, drugs, or cigarettes.

#### 21 *Life-course impairment overall*



1  
2  
3 1 Overall, most women (80%, n=601) “somewhat agreed” or “strongly agreed” endometriosis-  
4 associated symptoms had caused them to lose time from their daily lives (figure 1D). A similar  
5  
6 2 associated symptoms had caused them to lose time from their daily lives (figure 1D). A similar  
7  
8 3 number of women reported that they were less positive about the future because of their  
9  
10 4 endometriosis-associated symptoms (80%, n=589), and 75% (n=556) “somewhat agreed” or  
11  
12 5 “strongly agreed” that endometriosis-associated symptoms had kept them from reaching their  
13  
14 6 full potential in life.

### 7 **Experiences and emotions associated with endometriosis**

8 Women reported that numerous experiences attributed to endometriosis had altered their life  
9 potential in a negative way (figure 2A) or negatively impacted their lives in other ways  
10 (figure 2B). The most frequent responses were common symptoms of endometriosis, including  
11 pelvic pain apart from menstruation, painful menstruation, pelvic pain during menstruation, and  
12 painful sexual intercourse.

13 Most women surveyed reported that endometriosis impacted their ability to perform daily tasks  
14 (81%, n=594); however, many of the negative experiences attributed to endometriosis were  
15 related to the use of healthcare services and treatments. For example, women reported taking  
16 prescription pain medications (72%, n=529), visiting emergency departments (66%, n=485),  
17 having multiple surgeries (55%, n=406), being hospitalized overnight (43%, n=313), taking  
18 prescription medication for depression or anxiety (52%, n=380), or seeing a mental health  
19 professional because of their endometriosis-associated symptoms (43%, n=316). Around half of  
20 the women surveyed reported that the experiences that most negatively impacted their lives  
21 were their need to take prescription medication (57%, n=427) and the multiple surgeries for  
22 endometriosis (49%, n=363). In addition, most women surveyed reported several negative  
23 emotions that they attributed to endometriosis, including feeling depressed (83%, n=607),

1  
2  
3 1 anxious (81%, n=592), unsexy (78%, n=572), or having low self-esteem (75%, n=554; figure  
4 2C).

5  
6  
7  
8  
9 3 Women managed the impact of their endometriosis in different ways (figure 2D). Most  
10 4 commonly, this included talking to a spouse or partner about their condition, using non-medical  
11 5 strategies (such as diet or exercise) to control their pain, and seeking support from friends and  
12 6 family.

13  
14  
15  
16  
17  
18  
19 7 **Additional analysis of women who believed their future and life potential were more**  
20 8 **impacted by endometriosis**

21  
22  
23  
24  
25 9 Most of the sample included women who “somewhat agreed” or “strongly agreed” that they were  
26 10 LPAF (80%; n=589) or had NRFP in life (75%; n=556) because of endometriosis, and several  
27 11 questions limited to these women were further analyzed (Supporting Information table 1).  
28  
29 12 Overall, the observational data in this study suggested women who believed they were LPAF or  
30 13 had NRFP generally reported more negative experiences than the fewer respondents who did  
31 14 not indicate they were LPAF (non-LPAF, 21%; n=154) or had NRFP (non-NRFP, 25%; n=187).  
32  
33 15 Daily pain was reported by 62% of women who believed they were LPAF and 61% of women  
34 16 who had NRFP because of endometriosis (34% non-LPAF and 40% non-NRFP; Supporting  
35 17 Information table 1A). Women who believed they were LPAF or had NRFP also reported  
36 18 negative experiences related to education and work they attributed to endometriosis, including  
37 19 having earned less money (61% LPAF, 29% non-LPAF, 66% NRFP, and 21% non-NRFP), not  
38 20 working a preferred job (54% LPAF, 25% non-LPAF, 58% NRFP, 17% non-NRFP), or not  
39 21 achieving educational goals (44% LPAF, 21% non-LPAF, 47% NRFP, 16% non-NRFP)  
40  
41 22 (Supporting Information table 1B). Most women who believed their future and life potential were  
42 23 more impacted by their disease reported endometriosis-related experiences altered their life  
43  
44  
45  
46  
47  
48  
49  
50  
51  
52  
53  
54  
55  
56  
57  
58  
59  
60

1 potential in a negative way (Supporting Information table 1C). Similarly, many of these women  
2 reported negative experiences and emotions they attributed to endometriosis (Supporting  
3 Information table 1D, E). All women used similar strategies to cope with and mitigate the impact  
4 of endometriosis on their lives (Supporting Information table 1F).

## 6 **DISCUSSION**

7 This survey found that women with endometriosis who self-reported pronounced symptoms  
8 reported experiences that negatively impacted their perspective of the future and overall life  
9 potential. For many women, endometriosis-associated symptoms negatively affect various  
10 areas of their lives, including education and employment, relationships and social engagements,  
11 and physical well-being. Participants indicated that adverse experiences related to management  
12 of their disease and its impact on everyday life also believed that their future and life potential  
13 were negatively impacted by endometriosis.

### 14 **Study implications**

15 The severity of pain reported by women who completed the online survey indicates that  
16 respondents in our study may have had a greater symptom burden than did women participating  
17 in previous studies using similar pain scales.<sup>26-28</sup> Women in our study also reported slightly  
18 lengthier delays in diagnosis after the onset of their first symptoms. Findings in previous studies  
19 have illustrated that delays are common in diagnosing endometriosis.<sup>15,29-37</sup> Although some  
20 recent literature suggests that the delay in diagnosis may be slowly improving,<sup>35</sup> the use of non-  
21 invasive and accurate diagnostic tools could improve diagnosis times and reduce women's pain  
22 and distress.<sup>37,38</sup> The delays in diagnosis reported by our study participants and others indicate

1 many women experiencing troublesome symptoms of endometriosis may still wait extended  
2 periods before receiving a definitive diagnosis and initiating treatment.

3 The higher pain burden and longer diagnostic delay reported in our sample, which may include  
4 higher numbers of women who sought social network support because they were more  
5 frustrated with their disease experience, could conceivably be due in part to their longer  
6 struggles with more challenging symptoms than would be observed in the general population of  
7 women with diagnosed endometriosis. Results from a recent study using the same social  
8 network to recruit participants found that the majority of respondents rated their worst pain  
9 higher than 7 on a 10-point scale, only a little lower than the pain rating given by the women in  
10 our study.<sup>39</sup> Additionally, the previous study participants also experienced a diagnostic delay,  
11 supporting the theory that recruitment from this member-centered network may draw more  
12 women who have struggled longer with their disease.<sup>39</sup> Interestingly, overall trends in diagnostic  
13 delays observed between age groups in our study are consistent with reports in previous  
14 research, ie, women whose symptom onset occurred at a younger age experienced longer  
15 times to diagnosis.<sup>15,31,35</sup>

16 Many respondents said they missed school and were generally unable to achieve their  
17 educational goals because of endometriosis. There is a dearth of research on the impact of  
18 endometriosis on women's educational aspirations and their ability to achieve goals due to  
19 endometriosis-associated symptoms, compared with the impact endometriosis has on  
20 professional work or other areas of life.<sup>9</sup> Findings from some existing studies suggest  
21 endometriosis-associated symptoms may impact grades, attendance, or completion of  
22 educational programs.<sup>21,22,40</sup> Although informative, these studies were more qualitative in nature  
23 and involved small sample sizes.<sup>21,22,40</sup> A quantitative study examining the lives of 78 women  
24 15 years after receiving a verified diagnosis of endometriosis found only a fraction of women

1 reported that their disease had a negative impact on their education.<sup>11</sup> However, the women  
2 included in that study seemed to report less frequent pain and endometriosis-related effects, like  
3 depression, compared with the reports made by women in our study. Furthermore, the small  
4 sample was collected at a single Norwegian hospital and the findings may not be representative  
5 of women's experiences with endometriosis on a wider scale.<sup>11</sup> Regardless, any impact on  
6 education is concerning, and our study results emphasize the need for additional research into  
7 this overlooked area in women with endometriosis. Research on other medical conditions, like  
8 adolescent fibromyalgia, supports that chronic pain can negatively impact education, reinforcing  
9 the likelihood that endometriosis may have a similar impact.<sup>41,42</sup>

10 Respondents in the current study also reported endometriosis-associated symptoms caused  
11 them to miss work, earn less money, prevented them from a job they would have preferred, or  
12 impeded their working full time or part time. Many health conditions that can occur with  
13 endometriosis can impact work productivity and potential, including depression, other chronic  
14 pain conditions or disorders, and digestive disorders.<sup>43</sup> Endometriosis was self-reported by  
15 respondents in this study, and it is possible that other chronic conditions (particularly, chronic  
16 overlapping pain conditions) may also contribute to women's perceived interference with  
17 productivity and employment opportunities. Indeed, more than half of women with symptomatic  
18 endometriosis can present with comorbid pain syndromes,<sup>44</sup> and these may include conditions  
19 associated with pelvic pain, like dysmenorrhea, irritable bowel syndrome, or painful bladder  
20 syndrome.<sup>45,46</sup> Findings from previous studies have also illustrated that endometriosis-  
21 associated symptoms may lead to losses in productivity both at home and in the workplace,  
22 potentially impacting professional achievement.<sup>12,34,47,48</sup> In our study, most women who indicated  
23 that they were LPAF or had NRFP because of endometriosis reported painful symptoms and  
24 negative experiences. Also, women who were LPAF or had NRFP often believed it was harder  
25 to perform daily tasks because of their disease.

1  
2  
3 1 Our results further support that endometriosis symptoms are disruptive and may lead to loss of  
4  
5 2 productivity, ultimately influencing women's major life decisions or consequences, including  
6  
7 3 whether to work at reduced capacity or pursue preferred jobs. Results from a recent multicenter  
8  
9 4 study of women with confirmed endometriosis and a matched comparison group found the  
10  
11 5 disease forced some women to seek work outside desired professions, which, in turn, resulted  
12  
13 6 in health-related limitations in career choices.<sup>48</sup> These collective findings are concerning  
14  
15 7 because satisfaction in a chosen profession—or, at a minimum, the options available to make  
16  
17 8 life decisions regarding one's profession—is an important component of an overall satisfying  
18  
19 9 quality of life, and the decision to work less or pursue a less desirable job may have  
20  
21 10 downstream implications for women's finances, relationships, social lives, or travel  
22  
23  
24 11 decisions.<sup>19,48</sup>

25  
26  
27  
28 12 Respondents to our survey reported endometriosis had a negative impact on their relationships,  
29  
30 13 social engagements, and ability to have children (when desired), which is consistent with  
31  
32 14 findings from a host of previous studies that demonstrated the negative impacts of  
33  
34 15 endometriosis on social well-being and health-related quality of life.<sup>9,12,34,47</sup> Interestingly, 46% of  
35  
36 16 women in our study reported experiencing infertility, which is slightly higher than the 14%–40%  
37  
38 17 range reported in previous studies, again hinting at our population's higher symptom  
39  
40 18 burden.<sup>34,39,49</sup> Other chronic pain conditions have also impacted these life-course components,  
41  
42 19 including conditions related to musculoskeletal pain and chronic back pain.<sup>50,51</sup>

43  
44  
45  
46 20 Similar to decisions involving education and professional achievement, life choices involving the  
47  
48 21 pursuit of intimate relationships or starting a family may have downstream implications in other  
49  
50 22 areas, like finance, psychological well-being, or employment, which may have their own  
51  
52 23 downstream impacts on additional aspects of a person's life course.<sup>19</sup> Likewise, women  
53  
54 24 frequently reported not being physically active and having poorer diets because of their disease.

1  
2  
3 1 Although few studies have examined this aspect of endometriosis, findings from two smaller  
4  
5 2 studies have suggested that pain associated with the disease may also have a negative impact  
6  
7 3 on exercise and nutrition.<sup>9,30,52</sup>  
8  
9

10  
11 4 Of particular concern was the view of many women that their disease made them increase their  
12  
13 5 use of alcohol, drugs, or cigarettes. Research into whether pain and experiences related to  
14  
15 6 endometriosis may be associated with higher rates of substance abuse is severely lacking.  
16  
17 7 However, there are demonstrated associations between other chronic pain conditions and  
18  
19 8 substance abuse that support our finding.<sup>53,54</sup> The results from our study draw attention to this  
20  
21 9 issue and highlight substance abuse as an important avenue for additional investigation.  
22  
23  
24  
25

26 10 The findings from our study indicate that women with endometriosis may experience many  
27  
28 11 healthcare-related side effects. Of particular concern, patients noted that treatments meant to  
29  
30 12 help reduce the burden of endometriosis may have their own negative impact. Many women  
31  
32 13 perceived that use of prescription medications and multiple surgeries to control the symptoms of  
33  
34 14 endometriosis had a negative impact on their life potential, and this response was also observed  
35  
36 15 in women who indicated they were LPAF or believed they had NRFP due to their disease.  
37  
38 16 Results from one recent study showed that medical treatment for a condition may increase a  
39  
40 17 patient's stress levels and potentially affect their psychological health.<sup>55</sup> Patients who were  
41  
42 18 taking prescription medications and who experienced more challenging adverse effects from  
43  
44 19 their therapies had higher perceived stress levels, and women undergoing multiple surgeries  
45  
46 20 were especially impacted. These reports underscore the potential value of supportive  
47  
48 21 psychological care for patients with endometriosis as part of effective long-term disease  
49  
50 22 management.  
51  
52  
53  
54  
55  
56  
57  
58  
59  
60



1  
2  
3 1 In general, women experienced a range of consequences that they attributed to living with and  
4  
5 2 managing the limitations imposed by endometriosis. In addition to pain, women reported that the  
6  
7 3 endometriosis-related experiences that most impacted their lives in a negative way included  
8  
9 4 depression or anxiety (80%), heavy menstrual bleeding (71%), the need to take prescription  
10  
11 5 treatments (57%) or undergo multiple surgeries (49%), or infertility (46%). In other studies,  
12  
13 6 women have reported not feeling “normal” or feminine, experiencing a range of negative  
14  
15 7 emotions (eg, anger, depression, hopelessness, disappointment, and exhaustion), having  
16  
17 8 limited physical or sexual activity, struggling to find appropriate treatments, feeling guilt over  
18  
19 9 disrupted relationships, and suffering in silence due to endometriosis-related  
20  
21 10 symptoms.<sup>22,23</sup> While each woman experienced the impact of endometriosis differently, the  
22  
23 11 majority believed that they were living life less fully than they could have because of their  
24  
25 12 endometriosis-associated symptoms. This belief was informed by the symptoms and healthcare  
26  
27 13 requirements they faced, and, in turn, may have influenced major life decisions that could have  
28  
29 14 their own deleterious effects on personal fulfillment and life potential. The interconnectedness of  
30  
31 15 effects triggered by major life decisions highlights the importance of conducting further research  
32  
33 16 into the cumulative burden of debilitating diseases like endometriosis within the context of an  
34  
35 17 individual’s life course.

## 18 **Strengths and limitations**

19 Limitations of this study include the selection of participants from an online community with  
20  
21 20 voluntary participation, no targeted sampling, and no way to calculate a response rate. The  
22  
23 21 participants were generally well educated, had access to health care, and participated in an  
24  
25 22 online patient social network. Data on race, ethnicity, or socioeconomic status were not  
26  
27 23 collected. Patients who experienced the most significant psychosocial impacts of endometriosis  
28  
29 24 or lacked the resources to access the online community may not have been represented in the



1 sample population, whereas the patients who were most affected by severe pelvic pain may  
2 have been more likely to participate in the study. These factors may have led to self-selection  
3 bias; therefore, the results of this study may not be generalizable to the overall population of  
4 patients with endometriosis. Any between-group comparisons are observational in nature and  
5 no definitive conclusions can be made in the absence of formal statistical analysis.

## 6 **Future implications**

7 Examining the cumulative life-course impact of endometriosis may influence a physician's ability  
8 to understand a woman's complete experience with the disease, help identify patients who are  
9 most vulnerable to its impacts, and inform options for management.<sup>9,20,22,56</sup> A fuller  
10 understanding of the life-course impact of endometriosis may also elucidate patterns of patient  
11 needs and identify which forms of supportive multidisciplinary care are necessary, including the  
12 need for early referral to specialists and other professionals who provide complementary  
13 healthcare. These needs are likely to change over time, during the different phases of each  
14 patient's life. For example, teams that include gynecologists and pain specialists may help  
15 patients manage endometriosis-associated pain symptoms; reproductive endocrinologists may  
16 help manage infertility, if this occurs; sexual health counselors may collaborate with patients  
17 who have dyspareunia; and counselors/psychologists may assist with chronic stress and mental  
18 health issues.<sup>57</sup> Physicians who are responsive to patients' individual needs and values can  
19 positively support overall quality of life in those patients who experience infertility<sup>58,59</sup> and other  
20 negative symptoms of endometriosis, such as chronic abdominal pain, dysmenorrhea, and  
21 dyspareunia.<sup>24</sup> Endometriosis may also contribute to social inequalities; further research is  
22 needed to explore this topic and develop social policies to address these inequalities.

## 1 **Conclusion**

2  
3  
4  
5  
6 2 In our international survey of the impact of endometriosis on a woman's life course, most  
7  
8 3 respondents self-reported a high burden associated with the disease that affected overall life  
9  
10 4 potential in many different ways. The findings of this survey add to our understanding of  
11  
12 5 women's experiences with endometriosis.  
13  
14  
15  
16  
17  
18  
19  
20  
21  
22  
23  
24  
25  
26  
27  
28  
29  
30  
31  
32  
33  
34  
35  
36  
37  
38  
39  
40  
41  
42  
43  
44  
45  
46  
47  
48  
49  
50  
51  
52  
53  
54  
55  
56  
57  
58  
59  
60

## 1 **Acknowledgments**

2  
3  
4  
5  
6  
7 2 Financial assistance in developing the survey and collecting data was provided by AbbVie. In  
8  
9 3 partnership with MyHealthTeams, AbbVie participated in the interpretation of data, review, and  
10  
11 4 approval of the manuscript, and was involved in the decision to submit the manuscript for  
12  
13 5 publication. Medical writing support, funded by AbbVie, was provided by Michael M. Schofield,  
14  
15 6 PhD, Callie A. S. Corsa, PhD, and Kersten Reich, MPH, CMPP, of JB Ashtin, who developed  
16  
17 7 the first draft based on an author-approved outline and assisted in implementing author  
18  
19 8 revisions.  
20  
21  
22  
23

## 9 **Contributors**

10 SAM, FT, OAF, AH, BS, and SA-S contributed to the study concept and design. BS contributed  
11  
12 to data acquisition and statistical analysis. SAM, FT, AMS, SEC, SC, SE, OAF, AH, BS, and  
13  
14 SA-S contributed to data interpretation.  
15  
16  
17  
18  
19  
20  
21  
22  
23  
24  
25  
26  
27  
28  
29  
30  
31  
32  
33  
34  
35  
36  
37  
38  
39  
40  
41  
42  
43  
44  
45  
46  
47  
48  
49

## 13 **Funding**

14 Financial support for this study was provided by AbbVie Inc (award/grant number NA).  
15  
16  
17  
18  
19  
20  
21  
22  
23  
24  
25  
26  
27  
28  
29  
30  
31  
32  
33  
34  
35  
36  
37  
38  
39  
40  
41  
42  
43  
44  
45  
46  
47  
48  
49

## 16 **Competing interests**

17 SA Missmer is a consultant for AbbVie, Oratel Diagnostics, and Celmatix and receives research  
18  
19 support from the National Institutes of Health, Department of Defense, and Marriott Family  
20  
21  
22  
23  
24  
25  
26  
27  
28  
29  
30  
31  
32  
33  
34  
35  
36  
37  
38  
39  
40  
41  
42  
43  
44  
45  
46  
47  
48  
49

1  
2  
3  
4 1 FF Tu has received research support from NICHD-NIH and NIDDK-NIH, earns royalties from  
5  
6 2 UpToDate, has served as a consultant for AbbVie, Myovant, and Uroshape, and conducts  
7  
8 3 sponsored research for Eximis and Dot Laboratories.  
9

10  
11 4  
12  
13  
14  
15 5 AM Soliman, S Chiuve, S Cross, S Eichner, and O Antunez Flores are employees of AbbVie  
16  
17 6 and may own AbbVie stock/stock options.  
18  
19

20  
21 7 A Horne has received grant funding from the UK MRC, NIHR, CSO, Wellbeing of Women,  
22  
23 8 Ferring, AstraZeneca, the Charles Wolfson Charitable Trust, and Standard Life. His institution  
24  
25 9 has received consultancy fees from Roche Diagnostics, Nordic Pharma, Ferring and AbbVie. He  
26  
27 10 is Chair of the RCOG Academic Board, ESHRE National Representative for the UK, WES  
28  
29 11 Board Member and Ambassador, SEUD Board Member, Trustee and Medical Advisor to  
30  
31 12 Endometriosis UK, and Medical Advisor to Pelvic Pain Support Network.  
32  
33

34  
35  
36 13 B Schneider is an employee of MyHealthTeams, which received compensation for the study and  
37  
38 14 conducted the research on behalf of AbbVie.  
39  
40

41  
42 15 S As-Sanie earns author royalties from UpToDate and has served as a consultant for AbbVie,  
43  
44 16 Myovant, and Eximis.  
45  
46

#### 47 48 17 **Data availability statement** 49

50  
51 18 AbbVie is committed to responsible data sharing regarding the clinical trials and  
52  
53 19 studies we sponsor. This includes access to anonymized, individual and trial-level data  
54  
55 20 (analysis data sets), as well as other information (eg, protocols and clinical study  
56  
57  
58  
59  
60

1  
2  
3 1 reports), as long as the trials are not part of an ongoing or planned regulatory  
4  
5 2 submission. This includes requests for clinical trial data for unlicensed products and  
6  
7 3 indications.  
8  
9  
10 4 This study data can be requested by any qualified researchers who engage in rigorous,  
11  
12 5 independent scientific research, and will be provided following review and approval of a  
13  
14 6 research proposal and statistical analysis plan and execution of a data sharing  
15  
16 7 agreement. Data requests can be submitted at any time and the data will be accessible  
17  
18 8 for 12 months, with possible extensions considered. For more information on the  
19  
20 9 process, or to submit a request, visit the following link: [https://www.abbvie.com/our-](https://www.abbvie.com/our-science/clinical-trials/clinical-trials-data-and-information-sharing/data-and-information-sharing-with-qualified-researchers.html)  
21  
22 10 [science/clinical-trials/clinical-trials-data-and-information-sharing/data-and-information-](https://www.abbvie.com/our-science/clinical-trials/clinical-trials-data-and-information-sharing/data-and-information-sharing-with-qualified-researchers.html)  
23  
24 11 [sharing-with-qualified-researchers.html](https://www.abbvie.com/our-science/clinical-trials/clinical-trials-data-and-information-sharing/data-and-information-sharing-with-qualified-researchers.html).  
25  
26  
27  
28  
29  
30  
31  
32  
33  
34  
35  
36  
37  
38  
39  
40  
41  
42  
43  
44  
45  
46  
47  
48  
49  
50  
51  
52  
53  
54  
55  
56  
57  
58  
59  
60

**1 REFERENCES**

1. Zondervan KT, Becker CM, Missmer SA. Endometriosis. *N Engl J Med* 2020;382:1244-56.
2. Kennedy S, Bergqvist A, Chapron C, *et al*. Eshre guideline for the diagnosis and treatment of endometriosis. *Hum Reprod* 2005;20:2698-704.
3. Practice bulletin no. 114: Management of endometriosis. *Obstet Gynecol* 2010;116:223-36.
4. Zondervan KT, Becker CM, Koga K, *et al*. Endometriosis. *Nat Rev Dis Primers* 2018;4:9.
5. De Graaff AA, D'Hooghe TM, Dunselman GA, *et al*. The significant effect of endometriosis on physical, mental and social wellbeing: Results from an international cross-sectional survey. *Hum Reprod* 2013;28:2677-85.
6. Gallagher JS, DiVasta AD, Vitonis AF, *et al*. The impact of endometriosis on quality of life in adolescents. *J Adolesc Health* 2018;63:766-72.
7. Lagana AS, La Rosa VL, Rapisarda AMC, *et al*. Anxiety and depression in patients with endometriosis: Impact and management challenges. *Int J Womens Health* 2017;9:323-30.
8. Vannuccini S, Lazzeri L, Orlandini C, *et al*. Mental health, pain symptoms and systemic comorbidities in women with endometriosis: A cross-sectional study. *J Psychosom Obstet Gynaecol* 2018;39:315-20.
9. Culley L, Law C, Hudson N, *et al*. A qualitative study of the impact of endometriosis on male partners. *Hum Reprod* 2017;32:1667-73.
10. Denny E, Mann CH. Endometriosis-associated dyspareunia: The impact on women's lives. *J Fam Plann Reprod Health Care* 2007;33:189-93.

- 1  
2  
3 1 11. Fagervold B, Jenssen M, Hummelshoj L, *et al*. Life after a diagnosis with endometriosis - a  
4 2 15 years follow-up study. *Acta Obstet Gynecol Scand* 2009;88:914-9.  
5  
6  
7  
8 3 12. Soliman AM, Coyne KS, Gries KS, *et al*. The effect of endometriosis symptoms on  
9 4 absenteeism and presenteeism in the workplace and at home. *J Manag Care Spec Pharm*  
10 5 2017;23:745-54.  
11  
12  
13  
14  
15 6 13. Leonardi M, Horne AW, Armour M, *et al*. Endometriosis and the coronavirus (covid-19)  
16 7 pandemic: Clinical advice and future considerations. *Frontiers in Reproductive Health* 2020;2  
17  
18  
19  
20 8 14. Leonardi M, Horne AW, Vincent K, *et al*. Self-management strategies to consider to combat  
21 9 endometriosis symptoms during the covid-19 pandemic. *Hum Reprod Open*  
22 10 2020;2020:hoaa028.  
23  
24  
25  
26  
27 11 15. Klein S, D'Hooghe T, Meuleman C, *et al*. What is the societal burden of endometriosis-  
28 12 associated symptoms? A prospective belgian study. *Reprod Biomed Online* 2014;28:116-24.  
29  
30  
31  
32 13 16. Simoens S, Dunselman G, Dirksen C, *et al*. The burden of endometriosis: Costs and quality  
33 14 of life of women with endometriosis and treated in referral centres. *Hum Reprod*  
34 15 2012;27:1292-9.  
35  
36  
37  
38  
39 16 17. Soliman AM, Taylor HS, Bonafede M, *et al*. Incremental direct and indirect cost burden  
40 17 attributed to endometriosis surgeries in the united states. *Fertil Steril* 2017;107:1181-90 e2.  
41  
42  
43  
44 18 18. Soliman AM, Yang H, Du EX, *et al*. The direct and indirect costs associated with  
45 19 endometriosis: A systematic literature review. *Hum Reprod* 2016;31:712-22.  
46  
47  
48  
49 20 19. Bhatti Z, Salek M, Finlay A. Chronic diseases influence major life changing decisions: A new  
50 21 domain in quality of life research. *J R Soc Med* 2011;104:241-50.  
51  
52  
53  
54  
55  
56  
57  
58  
59  
60

- 1  
2  
3 1 20. Kimball AB, Gieler U, Linder D, *et al*. Psoriasis: Is the impairment to a patient's life  
4 2 cumulative? *J Eur Acad Dermatol Venereol* 2010;24:989-1004.  
5  
6  
7  
8 3 21. Huntington A, Gilmour JA. A life shaped by pain: Women and endometriosis. *J Clin Nurs*  
9 4 2005;14:1124-32.  
10  
11  
12  
13 5 22. Moradi M, Parker M, Sneddon A, *et al*. Impact of endometriosis on women's lives: A  
14 6 qualitative study. *BMC Womens Health* 2014;14:123.  
15  
16  
17  
18 7 23. Cole JM, Grogan S, Turley E. "The most lonely condition i can imagine": Psychosocial  
19 8 impacts of endometriosis on women's identity. *Feminism & Psychology* 2021;31:171-91.  
20  
21  
22  
23  
24 9 24. Apers S, Dancet EAF, Aarts JWM, *et al*. The association between experiences with patient-  
25 10 centred care and health-related quality of life in women with endometriosis. *Reprod Biomed*  
26 11 *Online* 2018;36:197-205.  
27  
28  
29  
30  
31 12 25. Witzeman K, Antunez Flores O, Renzelli-Cain RI, *et al*. Patient-physician interactions  
32 13 regarding dyspareunia with endometriosis: Online survey results. *J Pain Res* 2020;13:1579-  
33 14 89.  
34  
35  
36  
37 15 26. Bourdel N, Alves J, Pickering G, *et al*. Systematic review of endometriosis pain assessment:  
38 16 How to choose a scale? *Hum Reprod Update* 2015;21:136-52.  
39  
40  
41  
42  
43 17 27. Chawla S. Treatment of endometriosis and chronic pelvic pain with letrozole and  
44 18 norethindrone acetate. *Med J Armed Forces India* 2010;66:213-5.  
45  
46  
47  
48 19 28. Facchin F, Barbara G, Saita E, *et al*. Impact of endometriosis on quality of life and mental  
49 20 health: Pelvic pain makes the difference. *J Psychosom Obstet Gynaecol* 2015;36:135-41.  
50  
51  
52  
53 21 29. Ballard K, Lowton K, Wright J. What's the delay? A qualitative study of women's experiences  
54 22 of reaching a diagnosis of endometriosis. *Fertil Steril* 2006;86:1296-301.  
55  
56  
57  
58  
59  
60



- 1  
2  
3 1 30. Bernuit D, Ebert AD, Halis G, *et al*. Female perspectives on endometriosis: Findings from  
4 2 the uterine bleeding and pain women's research study. *Journal of Endometriosis* 2011;3:73-  
5 3 85.  
6  
7  
8  
9  
10 4 31. Greene R, Stratton P, Cleary SD, *et al*. Diagnostic experience among 4,334 women  
11 5 reporting surgically diagnosed endometriosis. *Fertil Steril* 2009;91:32-9.  
12  
13  
14  
15 6 32. Hadfield R, Mardon H, Barlow D, *et al*. Delay in the diagnosis of endometriosis: A survey of  
16 7 women from the USA and the uk. *Hum Reprod* 1996;11:878-80.  
17  
18  
19  
20 8 33. Hudelist G, Fritzer N, Thomas A, *et al*. Diagnostic delay for endometriosis in austria and  
21 9 germany: Causes and possible consequences. *Hum Reprod* 2012;27:3412-6.  
22  
23  
24  
25 10 34. Nnoaham KE, Hummelshoj L, Webster P, *et al*. Impact of endometriosis on quality of life  
26 11 and work productivity: A multicenter study across ten countries. *Fertil Steril* 2011;96:366-73  
27 12 e8.  
28  
29  
30  
31  
32 13 35. Soliman AM, Fuldeore M, Snabes MC. Factors associated with time to endometriosis  
33 14 diagnosis in the united states. *J Womens Health (Larchmt)* 2017;26:788-97.  
34  
35  
36  
37 15 36. Staal AH, van der Zanden M, Nap AW. Diagnostic delay of endometriosis in the  
38 16 Netherlands. *Gynecol Obstet Invest* 2016;81:321-4.  
39  
40  
41  
42 17 37. Nnoaham KE, Hummelshoj L, Kennedy SH, *et al*. Developing symptom-based predictive  
43 18 models of endometriosis as a clinical screening tool: Results from a multicenter study. *Fertil*  
44 19 *Steril* 2012;98:692-701 e5.  
45  
46  
47  
48  
49 20 38. Brosens I, Puttemans P, Campo R, *et al*. Non-invasive methods of diagnosis of  
50 21 endometriosis. *Curr Opin Obstet Gynecol* 2003;15:519-22.  
51  
52  
53  
54  
55  
56  
57  
58  
59  
60

- 1  
2  
3 1 39. Lamvu G, Antunez-Flores O, Orady M, *et al*. Path to diagnosis and women's perspectives  
4 2 on the impact of endometriosis pain. *Journal of Endometriosis and Pelvic Pain Disorders*  
5 3 2020;2284026520903214.  
6  
7  
8  
9  
10 4 40. Gilmour JA, Huntington A, Wilson HV. The impact of endometriosis on work and social  
11 5 participation. *Int J Nurs Pract* 2008;14:443-8.  
12  
13  
14  
15 6 41. Murray CB, Groenewald CB, de la Vega R, *et al*. Long-term impact of adolescent chronic  
16 7 pain on young adult educational, vocational, and social outcomes. *Pain* 2020;161:439-45.  
17  
18  
19  
20 8 42. Kashikar-Zuck S, Lynch AM, Graham TB, *et al*. Social functioning and peer relationships of  
21 9 adolescents with juvenile fibromyalgia syndrome. *Arthritis Rheum* 2007;57:474-80.  
22  
23  
24  
25 10 43. de Graaf R, Tuithof M, van Dorsselaer S, *et al*. Comparing the effects on work performance  
26 11 of mental and physical disorders. *Soc Psychiatry Psychiatr Epidemiol* 2012;47:1873-83.  
27  
28  
29  
30  
31 12 44. Smorgick N, Marsh CA, As-Sanie S, *et al*. Prevalence of pain syndromes, mood conditions,  
32 13 and asthma in adolescents and young women with endometriosis. *J Pediatr Adolesc Gynecol*  
33 14 2013;26:171-5.  
34  
35  
36  
37 15 45. Yosef A, Allaire C, Williams C, *et al*. Multifactorial contributors to the severity of chronic  
38 16 pelvic pain in women. *Am J Obstet Gynecol* 2016;215:760 e1-60 e14.  
39  
40  
41  
42 17 46. Evans SF, Brooks TA, Esterman AJ, *et al*. The comorbidities of dysmenorrhea: A clinical  
43 18 survey comparing symptom profile in women with and without endometriosis. *J Pain Res*  
44 19 2018;11:3181-94.  
45  
46  
47  
48  
49 20 47. Fourquet J, Baez L, Figueroa M, *et al*. Quantification of the impact of endometriosis  
50 21 symptoms on health-related quality of life and work productivity. *Fertil Steril* 2011;96:107-12.  
51  
52  
53  
54  
55  
56  
57  
58  
59  
60

- 1  
2  
3 1 48. Sperschneider ML, Hengartner MP, Kohl-Schwartz A, *et al*. Does endometriosis affect  
4 2 professional life? A matched case-control study in Switzerland, Germany and Austria. *BMJ*  
5 3 *open* 2019;9:e019570.  
6  
7  
8  
9  
10 4 49. Prescott J, Farland LV, Tobias DK, *et al*. A prospective cohort study of endometriosis and  
11 5 subsequent risk of infertility. *Hum Reprod* 2016;31:1475-82.  
12  
13  
14  
15 6 50. Geisser ME, Cano A, Leonard MT. Factors associated with marital satisfaction and mood  
16 7 among spouses of persons with chronic back pain. *J Pain* 2005;6:518-25.  
17  
18  
19  
20 8 51. Leonard MT, Cano A. Pain affects spouses too: Personal experience with pain and  
21 9 catastrophizing as correlates of spouse distress. *Pain* 2006;126:139-46.  
22  
23  
24  
25 10 52. Fourquet J, Gao X, Zavala D, *et al*. Patients' report on how endometriosis affects health,  
26 11 work, and daily life. *Fertil Steril* 2010;93:2424-28.  
27  
28  
29  
30  
31 12 53. Maleki N, Tahaney K, Thompson BL, *et al*. At the intersection of alcohol use disorder and  
32 13 chronic pain. *Neuropsychology* 2019;33:795-807.  
33  
34  
35  
36 14 54. Groenewald CB, Law EF, Fisher E, *et al*. Associations between adolescent chronic pain and  
37 15 prescription opioid misuse in adulthood. *J Pain* 2019;20:28-37.  
38  
39  
40  
41 16 55. Lazzeri L, Orlandini C, Vannuccini S, *et al*. Endometriosis and perceived stress: Impact of  
42 17 surgical and medical treatment. *Gynecol Obstet Invest* 2015;79:229-33.  
43  
44  
45  
46 18 56. Oehmke F, Weyand J, Hackethal A, *et al*. Impact of endometriosis on quality of life: A pilot  
47 19 study. *Gynecol Endocrinol* 2009;25:722-5.  
48  
49  
50  
51 20 57. Ugwumadu L, Chakrabarti R, Williams-Brown E, *et al*. The role of the multidisciplinary team  
52 21 in the management of deep infiltrating endometriosis. *Gynecol Surg* 2017;14:15.  
53  
54  
55  
56  
57  
58  
59  
60

- 1  
2  
3 1 58. Aarts JW, Huppelschoten AG, van Empel IW, *et al*. How patient-centred care relates to  
4 2 patients' quality of life and distress: A study in 427 women experiencing infertility. *Hum*  
5 3 *Reprod* 2012;27:488-95.  
6  
7  
8  
9  
10 4 59. Gameiro S, Canavarro MC, Boivin J. Patient centred care in infertility health care: Direct and  
11 5 indirect associations with wellbeing during treatment. *Patient Educ Couns* 2013;93:646-54.  
12  
13  
14  
15 6  
16  
17 7  
18  
19  
20  
21  
22  
23  
24  
25  
26  
27  
28  
29  
30  
31  
32  
33  
34  
35  
36  
37  
38  
39  
40  
41  
42  
43  
44  
45  
46  
47  
48  
49  
50  
51  
52  
53  
54  
55  
56  
57  
58  
59  
60

1  
2  
3 **1 FIGURE LEGENDS**  
4  
5

6  
7 **2 Figure 1. Life-course impact of endometriosis**  
8

9  
10 3 Women were asked to indicate how much they agreed with statements involving the impact of  
11  
12 4 endometriosis on (A) educational and professional achievements, (B) social life and  
13  
14 5 relationships, (C) physical well-being, and (D) overall life course.  
15

16  
17  
18 **6 Figure 2. Experiences and emotions attributed to endometriosis**  
19

20 7 Respondents were asked to select which experiences related to endometriosis had the most  
21  
22 8 negative impacts on their life potential (A). Women were also asked to indicate which general  
23  
24 9 negative experiences (B) and emotions (C) they had undergone because of endometriosis and  
25  
26 10 what kinds of approaches they had taken to manage the impact of endometriosis (D).  
27  
28  
29  
30  
31  
32  
33  
34  
35  
36  
37  
38  
39  
40  
41  
42  
43  
44  
45  
46  
47  
48  
49  
50  
51  
52  
53  
54  
55  
56  
57  
58  
59  
60

FIGURE 1

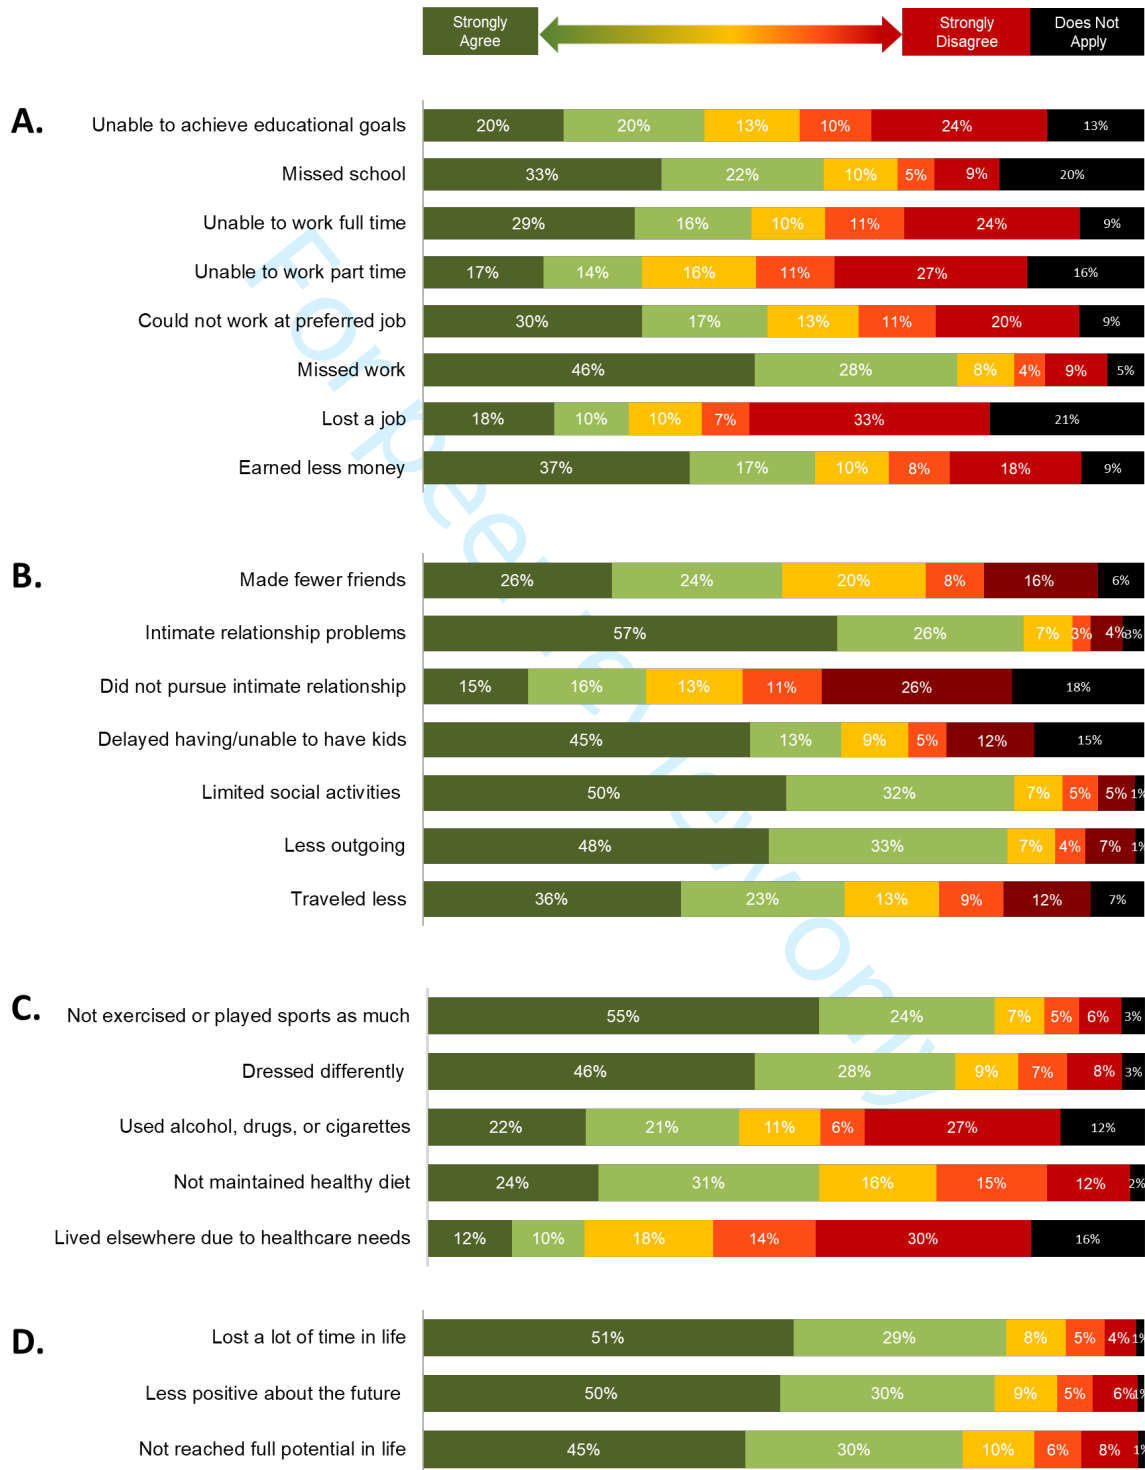

FIGURE 2



1  
2  
3 **The impact of endometriosis on women's life decisions and goal attainment measured in**  
4 **a cross-sectional survey of members of an online patient community**  
5  
6  
7

8  
9 Stacey A Missmer,<sup>1</sup> Frank F Tu,<sup>2</sup> Ahmed M Soliman,<sup>3</sup> Stephanie E Chiuve,<sup>3</sup> Sarah Cross,<sup>3</sup>  
10  
11 Samantha Eichner,<sup>3</sup> Oscar Antunez Flores,<sup>3</sup> Andrew W Horne,<sup>4</sup> Beth Schneider,<sup>5</sup> Sawsan As-  
12  
13 Sanie<sup>6</sup>  
14  
15

16  
17  
18 <sup>1</sup>Department of Epidemiology, Harvard T. H. Chan School of Public Health; and Boston Center  
19  
20 for Endometriosis, Boston, Massachusetts, USA, and Department of Obstetrics, Gynecology,  
21  
22 and Reproductive Biology, Michigan State University, Grand Rapids, Michigan, USA;  
23

24 <sup>2</sup>Department of Obstetrics and Gynecology, NorthShore University Health System and Pritzker  
25  
26 School of Medicine, University of Chicago, Evanston, Illinois, USA; <sup>3</sup>AbbVie Inc, North Chicago,  
27  
28 Illinois, USA; <sup>4</sup>Medical Research Council Centre for Reproductive Health, University of  
29  
30 Edinburgh, Edinburgh, UK; <sup>5</sup>MyHealthTeams, San Francisco, California, USA; <sup>6</sup>Department of  
31  
32 Obstetrics and Gynecology, University of Michigan, Ann Arbor, Michigan, USA.  
33  
34  
35  
36  
37  
38  
39  
40  
41  
42  
43  
44  
45  
46  
47  
48  
49  
50  
51  
52  
53  
54  
55  
56  
57  
58  
59  
60



## SUPPORTING INFORMATION

**Supporting Information Table 1.** Women indicated how much they agreed or disagreed with the impact of endometriosis on the following: (A) pain, (B) work and education, (C) life experiences altered in a negative way, (D) impact on life, (E) feelings, and (F) management of impact.

**Supporting Information Figure 1.** Impact of endometriosis on educational and professional achievements in the United States (A) and in the rest of the world (B).

**Survey.** MyEndometriosisTeam Survey – Life Course Impact Survey

Supporting Information Table 1.

| <b>S1A</b>                                               | <b>Daily</b> | <b>A few times<br/>a week</b> | <b>A few times<br/>a month</b> | <b>Weekly</b> | <b>Monthly</b> | <b>Every few<br/>months</b> | <b>Never</b> | <b>Once or<br/>twice a<br/>year</b> |
|----------------------------------------------------------|--------------|-------------------------------|--------------------------------|---------------|----------------|-----------------------------|--------------|-------------------------------------|
| <b>Total, n (%)<br/>(N = 743)</b>                        | 415 (55.9)   | 160 (21.5)                    | 78 (10.5)                      | 43 (5.8)      | 31 (4.2)       | 9 (1.2)                     | 4 (0.5)      | 3 (0.4)                             |
| <b>Less positive about future, n (%)<br/>(n = 589)</b>   | 362 (61.5)   | 120 (20.4)                    | 50 (8.5)                       | 31 (5.3)      | 16 (2.7)       | 6 (1.0)                     | 2 (0.3)      | 2 (0.3)                             |
| <b>Remaining respondents<br/>(n = 154)</b>               | 53 (34.4)    | 40 (26.0)                     | 28 (18.2)                      | 12 (7.8)      | 15 (9.7)       | 3 (1.9)                     | 2 (1.3)      | 1 (0.6)                             |
| <b>Did not reach full potential, n (%)<br/>(n = 556)</b> | 341 (61.3)   | 121 (21.8)                    | 44 (7.9)                       | 28 (5.0)      | 13 (2.3)       | 6 (1.1)                     | 2 (0.4)      | 1 (0.2)                             |
| <b>Remaining respondents<br/>(n = 187)</b>               | 74 (39.6)    | 39 (20.9)                     | 15 (8.0)                       | 34 (18.2)     | 18 (9.6)       | 3 (1.6)                     | 2 (1.1)      | 2 (1.1)                             |

  

| <b>S1B</b>                                               | <b>Missed days of<br/>work</b> | <b>Missed school</b> | <b>Earned less<br/>money</b> | <b>Could not<br/>work at<br/>preferred job</b> | <b>Unable to<br/>work full time</b> | <b>Unable to<br/>achieve<br/>educational<br/>goals</b> | <b>Unable to<br/>work part time</b> | <b>Lost a job</b> |
|----------------------------------------------------------|--------------------------------|----------------------|------------------------------|------------------------------------------------|-------------------------------------|--------------------------------------------------------|-------------------------------------|-------------------|
| <b>Total, n (%)<br/>(N = 743)</b>                        | 550 (74.9)                     | 413 (56.3)           | 404 (55.0)                   | 355 (48.4)                                     | 338 (46.0)                          | 290 (39.5)                                             | 226 (30.8)                          | 212 (28.9)        |
| <b>Less positive about future, n (%)<br/>(n = 589)</b>   | 463 (78.6)                     | 343 (58.2)           | 359 (61.0)                   | 316 (53.7)                                     | 300 (50.9)                          | 257 (43.6)                                             | 202 (34.3)                          | 190 (32.3)        |
| <b>Remaining respondents<br/>(n = 154)</b>               | 87 (56.5)                      | 70 (45.5)            | 45 (29.2)                    | 39 (25.3)                                      | 38 (24.7)                           | 33 (21.4)                                              | 24 (15.6)                           | 22 (14.3)         |
| <b>Did not reach full potential, n (%)<br/>(n = 556)</b> | 448 (80.6)                     | 329 (59.2)           | 365 (65.6)                   | 323 (58.1)                                     | 295 (53.1)                          | 261 (46.9)                                             | 205 (36.9)                          | 193 (34.7)        |
| <b>Remaining respondents<br/>(n = 187)</b>               | 102 (54.5)                     | 84 (44.9)            | 39 (20.9)                    | 32 (17.1)                                      | 43 (23.0)                           | 29 (15.5)                                              | 21 (11.2)                           | 19 (10.2)         |

| <b>S1C</b>                                               | <b>Pelvic pain<br/>apart from<br/>period</b> | <b>Painful<br/>periods</b> | <b>Pelvic pain<br/>during period</b> | <b>Depression or<br/>anxiety</b> | <b>Painful sexual<br/>intercourse</b> | <b>Heavy period-<br/>related<br/>bleeding</b> | <b>Other<br/>endometriosis-<br/>related pain</b> | <b>Taken<br/>prescription<br/>for symptoms</b> | <b>Multiple<br/>surgeries</b> | <b>Infertility</b> | <b>Other<br/>symptoms or<br/>conditions</b> |
|----------------------------------------------------------|----------------------------------------------|----------------------------|--------------------------------------|----------------------------------|---------------------------------------|-----------------------------------------------|--------------------------------------------------|------------------------------------------------|-------------------------------|--------------------|---------------------------------------------|
| <b>Total, n (%)<br/>(N = 743)</b>                        | 651 (87.6)                                   | 650 (87.5)                 | 633 (85.2)                           | 598 (80.5)                       | 576 (77.5)                            | 524 (70.5)                                    | 452 (60.8)                                       | 427 (57.5)                                     | 363 (48.9)                    | 342 (46.0)         | 317 (42.7)                                  |
| <b>Less positive about future, n (%)<br/>(n = 589)</b>   | 528 (89.6)                                   | 517 (87.8)                 | 506 (85.9)                           | 505 (85.7)                       | 461 (78.3)                            | 413 (70.1)                                    | 382 (64.9)                                       | 353 (59.9)                                     | 297 (50.4)                    | 272 (46.2)         | 268 (45.5)                                  |
| <b>Remaining respondents<br/>(n = 154)</b>               | 123 (79.9)                                   | 133 (86.4)                 | 127 (82.5)                           | 93 (60.4)                        | 115 (74.7)                            | 111 (72.1)                                    | 70 (45.5)                                        | 74 (48.1)                                      | 66 (42.9)                     | 70 (45.5)          | 49 (31.8)                                   |
| <b>Did not reach full potential, n (%)<br/>(n = 556)</b> | 500 (89.9)                                   | 491 (88.3)                 | 482 (86.7)                           | 476 (85.6)                       | 430 (77.3)                            | 400 (71.9)                                    | 366 (65.8)                                       | 332 (59.7)                                     | 284 (51.1)                    | 261 (46.9)         | 259 (46.6)                                  |
| <b>Remaining respondents<br/>(n = 187)</b>               | 151 (80.7)                                   | 159 (85.0)                 | 151 (80.7)                           | 122 (65.2)                       | 146 (78.1)                            | 124 (66.3)                                    | 86 (46.0)                                        | 95 (50.8)                                      | 79 (42.2)                     | 81 (43.3)          | 58 (31.0)                                   |

| <b>S1D</b>                                               | <b>Trouble<br/>performing<br/>daily tasks</b> | <b>Taken Rx<br/>pain<br/>medication</b> | <b>Gone to ER</b> | <b>Multiple<br/>surgeries</b> | <b>Depression/<br/>anxiety<br/>medication</b> | <b>Unable to<br/>get<br/>pregnant</b> | <b>Saw mental<br/>health<br/>professional</b> | <b>Hospitalized<br/>overnight</b> | <b>Experienced<br/>miscarriage</b> | <b>Relationship<br/>ended<br/>because<br/>unable to<br/>have sex</b> |
|----------------------------------------------------------|-----------------------------------------------|-----------------------------------------|-------------------|-------------------------------|-----------------------------------------------|---------------------------------------|-----------------------------------------------|-----------------------------------|------------------------------------|----------------------------------------------------------------------|
| <b>Total, n (%)<br/>(N = 743)</b>                        | 594 (80.9)                                    | 529 (72.1)                              | 485 (66.1)        | 406 (55.3)                    | 380 (51.8)                                    | 317 (43.2)                            | 316 (43.1)                                    | 313 (42.6)                        | 213 (29.0)                         | 147 (20.0)                                                           |
| <b>Less positive about future, n (%)<br/>(n = 589)</b>   | 500 (84.9)                                    | 442 (75.0)                              | 406 (68.9)        | 333 (56.5)                    | 327 (55.5)                                    | 251 (42.6)                            | 276 (46.9)                                    | 266 (45.2)                        | 167 (28.4)                         | 132 (22.4)                                                           |
| <b>Remaining respondents<br/>(n = 154)</b>               | 94 (61.0)                                     | 87 (56.5)                               | 79 (51.3)         | 73 (47.4)                     | 53 (34.4)                                     | 66 (42.9)                             | 40 (26.0)                                     | 47 (30.5)                         | 46 (29.9)                          | 15 (9.7)                                                             |
| <b>Did not reach full potential, n (%)<br/>(n = 556)</b> | 478 (86.0)                                    | 421 (75.7)                              | 390 (70.1)        | 311 (55.9)                    | 308 (55.4)                                    | 239 (43.0)                            | 265 (47.7)                                    | 249 (44.8)                        | 166 (29.9)                         | 132 (23.7)                                                           |
| <b>Remaining respondents<br/>(n = 187)</b>               | 116 (62.0)                                    | 108 (57.8)                              | 95 (50.8)         | 95 (50.8)                     | 72 (38.5)                                     | 78 (41.7)                             | 51 (27.3)                                     | 64 (34.2)                         | 47 (25.1)                          | 15 (8.0)                                                             |

| <b>S1E</b>                                               | <b>Depressed</b> | <b>Anxious</b> | <b>Unsexy</b> | <b>Low self-esteem</b> | <b>Insecure</b> | <b>Inadequate</b> | <b>Embarrassed</b> | <b>Unfulfilled</b> | <b>Judged by others</b> | <b>Guilty</b> |
|----------------------------------------------------------|------------------|----------------|---------------|------------------------|-----------------|-------------------|--------------------|--------------------|-------------------------|---------------|
| <b>Total, n (%)<br/>(N = 743)</b>                        | 607 (82.7)       | 592 (80.7)     | 572 (77.9)    | 554 (75.5)             | 538 (73.3)      | 487 (66.3)        | 479 (65.3)         | 437 (59.5)         | 428 (58.3)              | 402 (54.8)    |
| <b>Less positive about future, n (%)<br/>(n = 589)</b>   | 517 (87.8)       | 491 (83.4)     | 468 (79.5)    | 478 (81.2)             | 469 (79.6)      | 421 (71.5)        | 415 (70.5)         | 387 (65.7)         | 380 (64.5)              | 350 (59.4)    |
| <b>Remaining respondents<br/>(n = 154)</b>               | 90 (58.4)        | 101 (65.6)     | 104 (67.5)    | 76 (49.4)              | 69 (44.8)       | 66 (42.9)         | 64 (41.6)          | 50 (32.5)          | 48 (31.2)               | 52 (33.8)     |
| <b>Did not reach full potential, n (%)<br/>(n = 556)</b> | 487 (87.6)       | 462 (83.1)     | 441 (79.3)    | 443 (79.7)             | 434 (78.1)      | 401 (72.1)        | 393 (70.7)         | 375 (67.4)         | 352 (63.3)              | 330 (59.4)    |
| <b>Remaining respondents<br/>(n = 187)</b>               | 120 (64.2)       | 130 (69.5)     | 131 (70.1)    | 111 (59.4)             | 104 (55.6)      | 86 (46.0)         | 86 (46.0)          | 62 (33.2)          | 76 (40.6)               | 72 (38.5)     |

  

| <b>S1F</b>                                               | <b>Talk to spouse or partner</b> | <b>Use non-medical methods for pain</b> | <b>Talk to friends and family</b> | <b>Educate self on treatments</b> | <b>Make doctor listen and respond to needs</b> | <b>Engage with other women with same experiences</b> | <b>Schedule social events around period</b> | <b>Pelvic floor or other exercises</b> | <b>Other</b> | <b>None of these</b> |
|----------------------------------------------------------|----------------------------------|-----------------------------------------|-----------------------------------|-----------------------------------|------------------------------------------------|------------------------------------------------------|---------------------------------------------|----------------------------------------|--------------|----------------------|
| <b>Total, n (%)<br/>(N = 743)</b>                        | 560 (76.3)                       | 533 (72.6)                              | 508 (69.2)                        | 502 (68.4)                        | 455 (62.0)                                     | 409 (55.7)                                           | 304 (41.4)                                  | 193 (26.3)                             | 70 (9.5)     | 26 (3.5)             |
| <b>Less positive about future, n (%)<br/>(n = 589)</b>   | 445 (75.6)                       | 425 (72.2)                              | 409 (69.4)                        | 409 (69.4)                        | 369 (62.6)                                     | 337 (57.2)                                           | 257 (43.6)                                  | 162 (27.5)                             | 61 (10.4)    | 19 (3.2)             |
| <b>Remaining respondents<br/>(n = 154)</b>               | 115 (74.7)                       | 108 (70.1)                              | 99 (64.3)                         | 93 (60.4)                         | 86 (55.8)                                      | 72 (46.8)                                            | 47 (30.5)                                   | 31 (20.1)                              | 9 (5.8)      | 7 (4.5)              |
| <b>Did not reach full potential, n (%)<br/>(n = 556)</b> | 418 (75.2)                       | 405 (72.8)                              | 383 (68.9)                        | 394 (70.9)                        | 345 (62.1)                                     | 325 (58.5)                                           | 246 (44.2)                                  | 153 (27.5)                             | 59 (10.6)    | 20 (3.6)             |
| <b>Remaining respondents<br/>(n = 187)</b>               | 142 (75.9)                       | 128 (68.4)                              | 125 (66.8)                        | 108 (57.8)                        | 110 (58.8)                                     | 84 (44.9)                                            | 58 (31.0)                                   | 40 (21.4)                              | 11 (5.9)     | 6 (3.2)              |

## Supporting Information Figure 1.



## Survey.

### MyEndometriosisTeam Survey – Life Course Impact Survey

#### Introduction

Part of our mission at MyEndometriosisTeam is to help build awareness and understanding of the impact that endometriosis can have on daily life. Creating a better understanding of what other women with endometriosis go through is important to many members. The aim of this study is to understand real-life experiences of women living with chronic endometriosis. This includes how it may influence life choices and any long-lasting effect it has.

This survey should take approximately 8 minutes to complete. Your participation is completely voluntary, and your responses are anonymous. MyEndometriosisTeam never shares any personally identifying information. Highlights of the findings of this research survey will be shared back with the MyEndometriosisTeam community. We are conducting this survey in collaboration with one of our pharmaceutical partners. This is one of the ways we keep MyEndometriosisTeam free while making sure your voice is heard. If you have any questions regarding the survey, please contact [support@myendometriosisteam.com](mailto:support@myendometriosisteam.com).

If you are 19 years of age or older, live in the United States (excluding Puerto Rico), understand the statements above and freely consent to participate in this research, click on the “Yes, I agree” button to begin the survey.

Yes, I agree

No thanks, I'd rather not participate

#### Section 1: Screening Questions

S1. Which of the following describes you?

Male (**Terminate**)

Female

1  
2  
3 S2. What is your age?  
4

5 Under 19 (**Terminate**)  
6

7 19-29  
8

9 30-39  
10

11 40-49  
12

13 50-59  
14

15 60 or older  
16  
17

18  
19 S3. Which one of the following best describes your condition?  
20

21 Stage 1 endometriosis  
22

23 Stage 2 endometriosis  
24

25 Stage 3 endometriosis  
26

27 Stage 4 endometriosis  
28

29 Not sure what stage of endometriosis I have  
30

31 I do not have endometriosis (**Terminate**)  
32  
33

34 S4. In which country do you currently live?  
35

36 United States (excluding Puerto Rico) (**Continue**)  
37

38 Australia  
39

40 Canada  
41

42 Ireland  
43

44 Netherlands  
45

46 New Zealand  
47

48 South Africa  
49

50 United Kingdom  
51

52 Other  
53  
54  
55  
56  
57  
58  
59  
60

### Section 1: Endometriosis Severity

1. At what age did your endometriosis symptoms begin? (drop-down menu)
2. At approximately what age did you start your first period? (drop-down menu)
3. Thinking about when you first started to experience endometriosis symptoms, approximately how many years did it take before you were diagnosed with endometriosis? (drop-down menu)
4. Did you ever have a surgical procedure, such as a laparoscopy or laparotomy, to confirm you have endometriosis?
  - Yes
  - No
  - Not sure
5. Which one of the following best describes how often you typically feel some type of endometriosis-related pain?
  - Daily
  - A few times a week
  - Weekly
  - A few times a month
  - Monthly
  - Every few months
  - Once or twice a year
  - Never



6. Please rate how severe your endometriosis related pain has been at its worst in the last 12 months using a scale from 0 to 10, where 0=no pain and 10=worst imaginable pain. (Drop down menu).

7. Over the years, has your endometriosis related pain gotten better, gotten worse, or stayed the same?

Gotten much better

Gotten somewhat better

Stayed the same

Gotten somewhat worse

Gotten much worse

## Section 2: Impact on Quality of Life and Life Choices

8. Please indicate how much you agree or disagree with the following statements about the impact endometriosis has had **on your entire life up to now**.

(Rotate order)

### **Because of my endometriosis:**

| (Please select one box for each row)               | Strongly disagree | Some-what Disagr | Neutral | Some-what Agree | Strongly agree | Not Applic-able |
|----------------------------------------------------|-------------------|------------------|---------|-----------------|----------------|-----------------|
| I was unable to achieve my educational goals       | 1                 | 2                | 3       | 4               | 5              | 6               |
| I missed many days of school                       | 1                 | 2                | 3       | 4               | 5              | 6               |
| I was unable to work full time                     | 1                 | 2                | 3       | 4               | 5              | 6               |
| I was unable to work part time                     | 1                 | 2                | 3       | 4               | 5              | 6               |
| I could not work at the job I would have preferred | 1                 | 2                | 3       | 4               | 5              | 6               |

|                                                                     |   |   |   |   |   |   |
|---------------------------------------------------------------------|---|---|---|---|---|---|
| I missed many days of work                                          | 1 | 2 | 3 | 4 | 5 | 6 |
| I lost a job                                                        | 1 | 2 | 3 | 4 | 5 | 6 |
| I earned less money than I could have                               | 1 | 2 | 3 | 4 | 5 | 6 |
| I made fewer friends                                                | 1 | 2 | 3 | 4 | 5 | 6 |
| I have had problems with sexual or intimate relationships           | 1 | 2 | 3 | 4 | 5 | 6 |
| I have not dated or pursued an intimate relationship                | 1 | 2 | 3 | 4 | 5 | 6 |
| I have delayed having or have been unable to have children          | 1 | 2 | 3 | 4 | 5 | 6 |
| I have limited my social activities                                 | 1 | 2 | 3 | 4 | 5 | 6 |
| I have not exercised or played sports as much as I would have liked | 1 | 2 | 3 | 4 | 5 | 6 |
| I do not live where I would like due to my healthcare needs         | 1 | 2 | 3 | 4 | 5 | 6 |
| I lost a lot of time in my life                                     | 1 | 2 | 3 | 4 | 5 | 6 |
| I have travelled less than I would have liked                       | 1 | 2 | 3 | 4 | 5 | 6 |
| I have dressed differently than I would have liked                  | 1 | 2 | 3 | 4 | 5 | 6 |
| I have used alcohol, drugs or smoked cigarettes                     | 1 | 2 | 3 | 4 | 5 | 6 |
| I have not maintained a healthy diet                                | 1 | 2 | 3 | 4 | 5 | 6 |
| I have been less outgoing                                           | 1 | 2 | 3 | 4 | 5 | 6 |
| I have been less positive about the future                          | 1 | 2 | 3 | 4 | 5 | 6 |
| I have not reached my full potential in life                        | 1 | 2 | 3 | 4 | 5 | 6 |

- 1  
2  
3 9. What endometriosis-related experiences, if any, do you think have most contributed to  
4 altering your life potential in a negative way? Select all that apply. (Rotate order)  
5  
6

7 Painful sexual intercourse

8 Pelvic pain during my period

9 Pelvic pain apart from during my period

10 Painful periods

11 Heavy period-related bleeding

12 Other endometriosis related pain

13 Infertility

14 Depression or anxiety

15 Multiple surgeries

16 Prescription treatment to control endometriosis symptoms

17 Other symptoms or conditions (please specify)

18 Other (please specify)

19 None  
20  
21  
22  
23  
24  
25  
26  
27  
28  
29  
30  
31  
32  
33  
34  
35  
36  
37  
38  
39  
40  
41  
42  
43  
44  
45  
46  
47  
48  
49  
50  
51  
52  
53  
54  
55  
56  
57  
58  
59  
60

- 1  
2  
3 10. Which, if any, of these, have you experienced as a result of your endometriosis? Check  
4 all that apply. (Rotate order)  
5  
6

7 Taken prescription medication for the pain (for example, opioids)

8 Taken prescription medication to treat depression or anxiety

9 Had multiple surgical procedures

10 Been hospitalized overnight

11 Gone to the emergency room

12 Received disability income due to being unable to work

13 Had a miscarriage (whether or not it was due to having endometriosis)

14 Had trouble performing daily tasks

15 Saw a mental health professional (eg., psychiatrist, counselor)

16 Was unable to get pregnant

17 Had a relationship end because I was unable to have children

18 Had a relationship end because I was unable to have sex

19 None of these  
20  
21  
22  
23  
24  
25  
26  
27  
28  
29  
30  
31  
32  
33  
34  
35  
36  
37  
38  
39  
40  
41  
42  
43  
44  
45  
46  
47  
48  
49  
50  
51  
52  
53  
54  
55  
56  
57  
58  
59  
60

- 1  
2  
3  
4  
5  
6  
7  
8  
9  
10  
11  
12  
13  
14  
15  
16  
17  
18  
19  
20  
21  
22  
23  
24  
25  
26  
27  
28  
29  
30  
31  
32  
33  
34  
35  
36  
37  
38  
39  
40  
41  
42  
43  
44  
45  
46  
47  
48  
49  
50  
51  
52  
53  
54  
55  
56  
57  
58  
59  
60
11. And which, if any, of these emotions, have you experienced as a result of your endometriosis? Check all that apply. (Rotate order)

**I have felt...**

Low self esteem

Judged by others

Inadequate

Unsexy

Insecure

Guilty

Determined

Strengthened

Hopeful

Embarrassed

Unfulfilled

Depressed

Anxious

None of these

For peer review only

- 1  
2  
3 12. Which of the following, if any, have you done to help manage the impact of endometriosis?  
4 Select all that apply. (rotate order)  
5

6  
7 Schedule social events around my period

8  
9 Engage with other women going through the same experiences

10  
11 Talk to my friends and family about endometriosis

12  
13 Talk to my spouse or partner about my endometriosis

14  
15 Pelvic floor or other exercises to lessen pain during sex

16  
17 Make sure my doctor listens and responds to my needs

18  
19 Educate myself on new treatments

20  
21 Use non-medical methods for controlling pain (e.g., ice or heat, lubricants during sex)

22  
23 Other (please describe)

24  
25 None of these

- 26  
27 13. Because of endometriosis, is there anything you feel you were unable to accomplish in  
28 your life? (open end)

- 29  
30 14. Is there anything else you would like us to know about the impact endometriosis has had  
31 on your life? (open end)  
32

33 Just a few last questions.  
34  
35  
36

- 37 D1. Which of the following best describes the area where you live?  
38  
39  
40

41 Urban

42 Suburban

43 Rural

44 Not sure / prefer not to say  
45  
46  
47  
48  
49  
50  
51  
52  
53  
54  
55  
56  
57  
58  
59  
60

1  
2  
3 D2. What is the highest level of education you have achieved?  
4  
5  
6

7 Less than high school

8 Some high school

9 High school or equivalent (e. g., GED)

10 Some college, but no degree

11 Associate degree

12 College degree (e.g., B.A., B.S.)

13 Some graduate school, but no degree

14 Graduate school (e.g., M.S., M.D., Ph.D.)

15 Prefer not to answer  
16  
17  
18  
19  
20  
21  
22  
23  
24

25 D3. What is your current employment status?  
26  
27

28 Working full time

29 Working part time

30 Unemployed, not looking for work

31 Unemployed, looking for work

32 Retired

33 Unable to work

34 Prefer not to answer  
35  
36  
37  
38  
39  
40  
41  
42  
43  
44  
45  
46  
47  
48  
49  
50  
51  
52  
53  
54  
55  
56  
57  
58  
59  
60

1  
2  
3 D4. Which of the following best describes your marital status?  
4  
5  
6

7 Single/never married

8 Married

9 Widowed

10 Divorced or separated

11 Prefer not to answer

12  
13  
14  
15  
16  
17  
18 (Skip D5 if “married” or “prefer not to answer” selected in D4)  
19  
20  
21

22 D5. Are you currently in an intimate relationship?  
23  
24  
25

26 Yes

27 No

28 Prefer not to answer  
29  
30  
31  
32

33 D6. How many children, if any, do you have?  
34  
35  
36  
37

38 None

39 1

40 2

41 3

42 4

43 5 or more

44 Prefer not to answer  
45  
46  
47  
48  
49  
50  
51

52 Thank you for answering these questions.  
53  
54  
55  
56  
57  
58  
59  
60



STROBE Statement—Checklist of items that should be included in reports of ***cross-sectional studies***

|                           | Item No | Recommendation                                                                                                                                                                       | Location in Manuscript                                                     |
|---------------------------|---------|--------------------------------------------------------------------------------------------------------------------------------------------------------------------------------------|----------------------------------------------------------------------------|
| <b>Title and abstract</b> | 1       | (a) Indicate the study's design with a commonly used term in the title or the abstract                                                                                               | Page 1, lines 1-2                                                          |
|                           |         | (b) Provide in the abstract an informative and balanced summary of what was done and what was found                                                                                  | Page 3, lines 1-22; page 4, lines 1-6                                      |
| <b>Introduction</b>       |         |                                                                                                                                                                                      |                                                                            |
| Background/rationale      | 2       | Explain the scientific background and rationale for the investigation being reported                                                                                                 | Page 5, lines 1-23; page 6, lines 1-18                                     |
| Objectives                | 3       | State specific objectives, including any prespecified hypotheses                                                                                                                     | Page 7, lines 1-11                                                         |
| <b>Methods</b>            |         |                                                                                                                                                                                      |                                                                            |
| Study design              | 4       | Present key elements of study design early in the paper                                                                                                                              | Page 7, lines 19-21; page 8, lines 1-23; page 9, lines 1-17                |
| Setting                   | 5       | Describe the setting, locations, and relevant dates, including periods of recruitment, exposure, follow-up, and data collection                                                      | Page 8, lines 4-5; page 9, lines 11-17                                     |
| Participants              | 6       | (a) Give the eligibility criteria, and the sources and methods of selection of participants                                                                                          | Page 9, lines 11-17                                                        |
| Variables                 | 7       | Clearly define all outcomes, exposures, predictors, potential confounders, and effect modifiers. Give diagnostic criteria, if applicable                                             | N/A                                                                        |
| Data sources/measurement  | 8*      | For each variable of interest, give sources of data and details of methods of assessment (measurement). Describe comparability of assessment methods if there is more than one group | Page 7, lines 20-21; page 8, lines 1-23; supporting information pages 7-17 |
| Bias                      | 9       | Describe any efforts to address potential sources of bias                                                                                                                            | Page 8, lines 17-18; page 9, lines 16-17                                   |
| Study size                | 10      | Explain how the study size was arrived at                                                                                                                                            | Page 9, lines 5-6 and 11-16                                                |
| Quantitative variables    | 11      | Explain how quantitative variables were handled in the analyses. If applicable, describe which groupings were chosen and why                                                         | Page 9, lines 19-20; page 10, lines 1-8                                    |

|    |                     |     |                                                                                                                                                                                                              |                                                                           |
|----|---------------------|-----|--------------------------------------------------------------------------------------------------------------------------------------------------------------------------------------------------------------|---------------------------------------------------------------------------|
| 1  |                     |     |                                                                                                                                                                                                              |                                                                           |
| 2  | Statistical methods | 12  | (a) Describe all statistical methods, including those used to control for confounding                                                                                                                        | Page 9, lines 19-20                                                       |
| 3  |                     |     | (b) Describe any methods used to examine subgroups and interactions                                                                                                                                          | Page 9, lines 19-20; page 10, lines 1-8                                   |
| 4  |                     |     | (c) Explain how missing data were addressed                                                                                                                                                                  | Page 8, lines 22-23                                                       |
| 5  |                     |     | (d) If applicable, describe analytical methods taking account of sampling strategy                                                                                                                           | N/A                                                                       |
| 6  |                     |     | (e) Describe any sensitivity analyses                                                                                                                                                                        | N/A                                                                       |
| 7  |                     |     |                                                                                                                                                                                                              |                                                                           |
| 8  |                     |     |                                                                                                                                                                                                              |                                                                           |
| 9  |                     |     |                                                                                                                                                                                                              |                                                                           |
| 10 |                     |     |                                                                                                                                                                                                              |                                                                           |
| 11 |                     |     |                                                                                                                                                                                                              |                                                                           |
| 12 | <b>Results</b>      |     |                                                                                                                                                                                                              |                                                                           |
| 13 |                     |     |                                                                                                                                                                                                              |                                                                           |
| 14 | Participants        | 13* | (a) Report numbers of individuals at each stage of study—eg numbers potentially eligible, examined for eligibility, confirmed eligible, included in the study, completing follow-up, and analysed            | Page 10, lines 11-12                                                      |
| 15 |                     |     | (b) Give reasons for non-participation at each stage                                                                                                                                                         | N/A                                                                       |
| 16 |                     |     | (c) Consider use of a flow diagram                                                                                                                                                                           | N/A                                                                       |
| 17 |                     |     |                                                                                                                                                                                                              |                                                                           |
| 18 |                     |     |                                                                                                                                                                                                              |                                                                           |
| 19 |                     |     |                                                                                                                                                                                                              |                                                                           |
| 20 |                     |     |                                                                                                                                                                                                              |                                                                           |
| 21 | Descriptive data    | 14* | (a) Give characteristics of study participants (eg demographic, clinical, social) and information on exposures and potential confounders                                                                     | Page 10, lines 13-21; page 11-12, Table 1                                 |
| 22 |                     |     | (b) Indicate number of participants with missing data for each variable of interest                                                                                                                          | N/A (no missing data; see page 8, lines 22-23)                            |
| 23 |                     |     |                                                                                                                                                                                                              |                                                                           |
| 24 |                     |     |                                                                                                                                                                                                              |                                                                           |
| 25 |                     |     |                                                                                                                                                                                                              |                                                                           |
| 26 |                     |     |                                                                                                                                                                                                              |                                                                           |
| 27 | Outcome data        | 15* | Report numbers of outcome events or summary measures                                                                                                                                                         | Pages 12-14; page 15, lines 1-7; Figures 1-2                              |
| 28 |                     |     |                                                                                                                                                                                                              |                                                                           |
| 29 |                     |     |                                                                                                                                                                                                              |                                                                           |
| 30 | Main results        | 16  | (a) Give unadjusted estimates and, if applicable, confounder-adjusted estimates and their precision (eg, 95% confidence interval). Make clear which confounders were adjusted for and why they were included | N/A                                                                       |
| 31 |                     |     | (b) Report category boundaries when continuous variables were categorized                                                                                                                                    | N/A                                                                       |
| 32 |                     |     | (c) If relevant, consider translating estimates of relative risk into absolute risk for a meaningful time period                                                                                             | N/A                                                                       |
| 33 |                     |     |                                                                                                                                                                                                              |                                                                           |
| 34 |                     |     |                                                                                                                                                                                                              |                                                                           |
| 35 |                     |     |                                                                                                                                                                                                              |                                                                           |
| 36 |                     |     |                                                                                                                                                                                                              |                                                                           |
| 37 |                     |     |                                                                                                                                                                                                              |                                                                           |
| 38 | Other analyses      | 17  | Report other analyses done—eg analyses of subgroups and interactions, and sensitivity analyses                                                                                                               | Page 15, lines 8-23; page 16, lines 1-5; supporting information pages 2-6 |
| 39 |                     |     |                                                                                                                                                                                                              |                                                                           |
| 40 |                     |     |                                                                                                                                                                                                              |                                                                           |
| 41 |                     |     |                                                                                                                                                                                                              |                                                                           |
| 42 |                     |     |                                                                                                                                                                                                              |                                                                           |
| 43 |                     |     |                                                                                                                                                                                                              |                                                                           |
| 44 |                     |     |                                                                                                                                                                                                              |                                                                           |
| 45 |                     |     |                                                                                                                                                                                                              |                                                                           |
| 46 |                     |     |                                                                                                                                                                                                              |                                                                           |

1  
2  
3  
4  
5  
6  
7  
8  
9  
10  
11  
12  
13  
14  
15  
16  
17  
18  
19  
20  
21  
22  
23  
24  
25  
26  
27  
28  
29  
30  
31  
32  
33  
34  
35  
36  
37  
38  
39  
40  
41  
42  
43  
44  
45  
46

| <b>Discussion</b>        |    |                                                                                                                                                                            |                                                               |
|--------------------------|----|----------------------------------------------------------------------------------------------------------------------------------------------------------------------------|---------------------------------------------------------------|
| Key results              | 18 | Summarise key results with reference to study objectives                                                                                                                   | Page 16, lines 8-14; page 23, lines 1-5                       |
| Limitations              | 19 | Discuss limitations of the study, taking into account sources of potential bias or imprecision. Discuss both direction and magnitude of any potential bias                 | Page 4, lines 15-19; page 21, lines 19-24; page 22, lines 1-5 |
| Interpretation           | 20 | Give a cautious overall interpretation of results considering objectives, limitations, multiplicity of analyses, results from similar studies, and other relevant evidence | Page 16, lines 16-23; pages 17-22                             |
| Generalisability         | 21 | Discuss the generalisability (external validity) of the study results                                                                                                      | Page 21, lines 1-17; page 22, lines 7-22; page 23, lines 1-5  |
| <b>Other information</b> |    |                                                                                                                                                                            |                                                               |
| Funding                  | 22 | Give the source of funding and the role of the funders for the present study and, if applicable, for the original study on which the present article is based              | Page 24, lines 11-12                                          |

\*Give information separately for exposed and unexposed groups.

**Note:** An Explanation and Elaboration article discusses each checklist item and gives methodological background and published examples of transparent reporting. The STROBE checklist is best used in conjunction with this article (freely available on the Web sites of PLoS Medicine at <http://www.plosmedicine.org/>, Annals of Internal Medicine at <http://www.annals.org/>, and Epidemiology at <http://www.epidem.com/>). Information on the STROBE Initiative is available at [www.strobe-statement.org](http://www.strobe-statement.org).
